# Supplementary material for: Computer-assisted designed “selenoxy–chinolin”: a new catalytic mechanism of the GPx-like cycle and inhibition of metal-free and metal-associated Aβ aggregation
Source: Royal Society of Chemistry journal article supplement (doi:10.1039/c5dt02130h), 2015-01-01
Supplement: c5dt02130h1.pdf [file c5dt02130h1.pdf]

## Supporting Information

for

### **Computer-Assisted Designed “selenoxy-chinolin”: New Catalytic Mechanism of GPx-like and inhibition of metal-free and metal-associated A $\beta$ aggregation**

Zhiren Wang, Yali Wang, Wenrui Li, Zhihong Liu, Zonghua Luo, Yang Sun, Ruibo Wu, Ling

Huang,\* Xingshu Li\*

School of Pharmaceutical Sciences, Sun Yat-sen University, Guangzhou, 510006, China

### Contents

**S2-S10** Computation Design

**S11-S25** Chemistry-Synthesis

**S26-S28** Coupled Reductase Assay

**S29-S64** Determination of the Catalytic Parameters

**S65-S73** Scavenging peroxide by GSH in the Presence of Compound

**S74-S96** Mechanism of the GPx-like Catalytic Cycle

**S97-S98** UV Spectrum of Metal binding

**S99-S101** Tables of Results for the PAMPA

**S102-S102** References

# 1. Computation Design

All calculations were performed by using the Gaussian 09 suite of quantum chemical programs. The computational models are fully optimized using DFT calculations at B3LYP/6-311+g(d,p) level of theory and characterized by frequency calculation. As glutathione was very flexible, the G group replaced with a Me group according to the reported method in literature.<sup>1,2</sup>

|                                                                                                                                                                                                                                                                                                                                                                                                                                                                                                                                                                                                                                                                                                                                                                                                                                                                                                                                                                                                                                                                                                                                                                                                                                                  |                                                                                     |           |           |           |   |          |           |           |   |          |           |           |   |          |           |          |   |          |          |          |   |          |          |           |   |          |          |          |   |          |          |          |   |          |          |          |   |          |          |          |   |          |           |           |   |          |          |           |   |           |          |           |   |           |          |           |   |           |           |           |   |           |          |           |                                                                                                                                                                                                                                                                                                                                                                                                                                                                                                                                                                                                                                                                                                                                                                                                                                                                                                                                                                                                                                                                                                                                                                                                                                               |   |          |           |           |   |          |           |           |   |          |           |           |   |          |          |          |   |          |          |          |   |          |          |           |   |          |          |          |   |          |          |          |   |          |          |          |   |          |          |          |   |          |           |           |   |          |          |           |   |          |          |           |   |          |           |           |   |           |          |           |   |           |          |           |
|--------------------------------------------------------------------------------------------------------------------------------------------------------------------------------------------------------------------------------------------------------------------------------------------------------------------------------------------------------------------------------------------------------------------------------------------------------------------------------------------------------------------------------------------------------------------------------------------------------------------------------------------------------------------------------------------------------------------------------------------------------------------------------------------------------------------------------------------------------------------------------------------------------------------------------------------------------------------------------------------------------------------------------------------------------------------------------------------------------------------------------------------------------------------------------------------------------------------------------------------------|-------------------------------------------------------------------------------------|-----------|-----------|-----------|---|----------|-----------|-----------|---|----------|-----------|-----------|---|----------|-----------|----------|---|----------|----------|----------|---|----------|----------|-----------|---|----------|----------|----------|---|----------|----------|----------|---|----------|----------|----------|---|----------|----------|----------|---|----------|-----------|-----------|---|----------|----------|-----------|---|-----------|----------|-----------|---|-----------|----------|-----------|---|-----------|-----------|-----------|---|-----------|----------|-----------|-----------------------------------------------------------------------------------------------------------------------------------------------------------------------------------------------------------------------------------------------------------------------------------------------------------------------------------------------------------------------------------------------------------------------------------------------------------------------------------------------------------------------------------------------------------------------------------------------------------------------------------------------------------------------------------------------------------------------------------------------------------------------------------------------------------------------------------------------------------------------------------------------------------------------------------------------------------------------------------------------------------------------------------------------------------------------------------------------------------------------------------------------------------------------------------------------------------------------------------------------|---|----------|-----------|-----------|---|----------|-----------|-----------|---|----------|-----------|-----------|---|----------|----------|----------|---|----------|----------|----------|---|----------|----------|-----------|---|----------|----------|----------|---|----------|----------|----------|---|----------|----------|----------|---|----------|----------|----------|---|----------|-----------|-----------|---|----------|----------|-----------|---|----------|----------|-----------|---|----------|-----------|-----------|---|-----------|----------|-----------|---|-----------|----------|-----------|
| 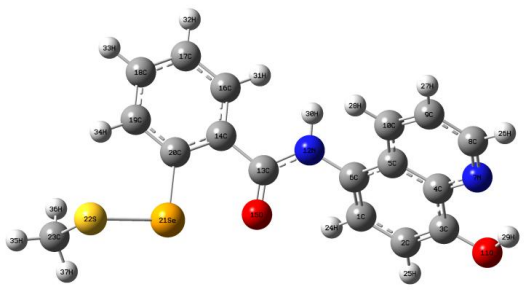                                                                                                                                                                                                                                                                                                                                                                                                                                                                                                                                                                                                                                                                                                                                                                                                                                                                                                                                                                                                                                                                                                                                                               |  |           |           |           |   |          |           |           |   |          |           |           |   |          |           |          |   |          |          |          |   |          |          |           |   |          |          |          |   |          |          |          |   |          |          |          |   |          |          |          |   |          |           |           |   |          |          |           |   |           |          |           |   |           |          |           |   |           |           |           |   |           |          |           |                                                                                                                                                                                                                                                                                                                                                                                                                                                                                                                                                                                                                                                                                                                                                                                                                                                                                                                                                                                                                                                                                                                                                                                                                                               |   |          |           |           |   |          |           |           |   |          |           |           |   |          |          |          |   |          |          |          |   |          |          |           |   |          |          |          |   |          |          |          |   |          |          |          |   |          |          |          |   |          |           |           |   |          |          |           |   |          |          |           |   |          |           |           |   |           |          |           |   |           |          |           |
| <p><b>Selenenyl sulfides for 11a</b></p>                                                                                                                                                                                                                                                                                                                                                                                                                                                                                                                                                                                                                                                                                                                                                                                                                                                                                                                                                                                                                                                                                                                                                                                                         | <p><b>Selenenyl sulfides for 11b</b></p>                                            |           |           |           |   |          |           |           |   |          |           |           |   |          |           |          |   |          |          |          |   |          |          |           |   |          |          |          |   |          |          |          |   |          |          |          |   |          |          |          |   |          |           |           |   |          |          |           |   |           |          |           |   |           |          |           |   |           |           |           |   |           |          |           |                                                                                                                                                                                                                                                                                                                                                                                                                                                                                                                                                                                                                                                                                                                                                                                                                                                                                                                                                                                                                                                                                                                                                                                                                                               |   |          |           |           |   |          |           |           |   |          |           |           |   |          |          |          |   |          |          |          |   |          |          |           |   |          |          |          |   |          |          |          |   |          |          |          |   |          |          |          |   |          |           |           |   |          |          |           |   |          |          |           |   |          |           |           |   |           |          |           |   |           |          |           |
| <p>Electronic Energy = - 3716.2103362</p>                                                                                                                                                                                                                                                                                                                                                                                                                                                                                                                                                                                                                                                                                                                                                                                                                                                                                                                                                                                                                                                                                                                                                                                                        | <p>Electronic Energy = - 4175.834644</p>                                            |           |           |           |   |          |           |           |   |          |           |           |   |          |           |          |   |          |          |          |   |          |          |           |   |          |          |          |   |          |          |          |   |          |          |          |   |          |          |          |   |          |           |           |   |          |          |           |   |           |          |           |   |           |          |           |   |           |           |           |   |           |          |           |                                                                                                                                                                                                                                                                                                                                                                                                                                                                                                                                                                                                                                                                                                                                                                                                                                                                                                                                                                                                                                                                                                                                                                                                                                               |   |          |           |           |   |          |           |           |   |          |           |           |   |          |          |          |   |          |          |          |   |          |          |           |   |          |          |          |   |          |          |          |   |          |          |          |   |          |          |          |   |          |           |           |   |          |          |           |   |          |          |           |   |          |           |           |   |           |          |           |   |           |          |           |
| <table border="1"> <tbody> <tr><td>C</td><td>2.507237</td><td>-1.037350</td><td>-1.519108</td></tr> <tr><td>C</td><td>3.721191</td><td>-1.750193</td><td>-1.555088</td></tr> <tr><td>C</td><td>4.769630</td><td>-1.375772</td><td>-0.745395</td></tr> <tr><td>C</td><td>4.608216</td><td>-0.279362</td><td>0.153018</td></tr> <tr><td>C</td><td>3.364552</td><td>0.417192</td><td>0.216361</td></tr> <tr><td>C</td><td>2.315340</td><td>0.029514</td><td>-0.665970</td></tr> <tr><td>N</td><td>5.678184</td><td>0.028034</td><td>0.930340</td></tr> <tr><td>C</td><td>5.559553</td><td>1.008751</td><td>1.799937</td></tr> <tr><td>C</td><td>4.365533</td><td>1.744779</td><td>1.970536</td></tr> <tr><td>C</td><td>3.276779</td><td>1.448309</td><td>1.184804</td></tr> <tr><td>O</td><td>5.951811</td><td>-2.025493</td><td>-0.777317</td></tr> <tr><td>N</td><td>1.098369</td><td>0.765198</td><td>-0.663554</td></tr> <tr><td>C</td><td>-0.158174</td><td>0.219299</td><td>-0.585920</td></tr> <tr><td>C</td><td>-1.314505</td><td>1.158940</td><td>-0.634531</td></tr> <tr><td>O</td><td>-0.339345</td><td>-0.988746</td><td>-0.459237</td></tr> <tr><td>C</td><td>-1.199354</td><td>2.465762</td><td>-1.135901</td></tr> </tbody> </table> | C                                                                                   | 2.507237  | -1.037350 | -1.519108 | C | 3.721191 | -1.750193 | -1.555088 | C | 4.769630 | -1.375772 | -0.745395 | C | 4.608216 | -0.279362 | 0.153018 | C | 3.364552 | 0.417192 | 0.216361 | C | 2.315340 | 0.029514 | -0.665970 | N | 5.678184 | 0.028034 | 0.930340 | C | 5.559553 | 1.008751 | 1.799937 | C | 4.365533 | 1.744779 | 1.970536 | C | 3.276779 | 1.448309 | 1.184804 | O | 5.951811 | -2.025493 | -0.777317 | N | 1.098369 | 0.765198 | -0.663554 | C | -0.158174 | 0.219299 | -0.585920 | C | -1.314505 | 1.158940 | -0.634531 | O | -0.339345 | -0.988746 | -0.459237 | C | -1.199354 | 2.465762 | -1.135901 | <table border="1"> <tbody> <tr><td>C</td><td>3.025375</td><td>-0.598322</td><td>-1.689178</td></tr> <tr><td>C</td><td>4.332409</td><td>-1.104983</td><td>-1.821232</td></tr> <tr><td>C</td><td>5.301008</td><td>-0.775905</td><td>-0.900044</td></tr> <tr><td>C</td><td>4.964327</td><td>0.059357</td><td>0.206465</td></tr> <tr><td>C</td><td>3.629874</td><td>0.540779</td><td>0.360812</td></tr> <tr><td>C</td><td>2.663301</td><td>0.212705</td><td>-0.633245</td></tr> <tr><td>N</td><td>5.965349</td><td>0.336768</td><td>1.080745</td></tr> <tr><td>C</td><td>5.690847</td><td>1.076294</td><td>2.134079</td></tr> <tr><td>C</td><td>4.398681</td><td>1.580427</td><td>2.403355</td></tr> <tr><td>C</td><td>3.377041</td><td>1.311084</td><td>1.523391</td></tr> <tr><td>O</td><td>6.566791</td><td>-1.227627</td><td>-1.016602</td></tr> <tr><td>N</td><td>1.350708</td><td>0.748807</td><td>-0.526789</td></tr> <tr><td>C</td><td>0.186236</td><td>0.040534</td><td>-0.683515</td></tr> <tr><td>O</td><td>0.174723</td><td>-1.171314</td><td>-0.880801</td></tr> <tr><td>C</td><td>-1.091107</td><td>0.801430</td><td>-0.582878</td></tr> <tr><td>C</td><td>-1.156733</td><td>2.190337</td><td>-0.770938</td></tr> </tbody> </table> | C | 3.025375 | -0.598322 | -1.689178 | C | 4.332409 | -1.104983 | -1.821232 | C | 5.301008 | -0.775905 | -0.900044 | C | 4.964327 | 0.059357 | 0.206465 | C | 3.629874 | 0.540779 | 0.360812 | C | 2.663301 | 0.212705 | -0.633245 | N | 5.965349 | 0.336768 | 1.080745 | C | 5.690847 | 1.076294 | 2.134079 | C | 4.398681 | 1.580427 | 2.403355 | C | 3.377041 | 1.311084 | 1.523391 | O | 6.566791 | -1.227627 | -1.016602 | N | 1.350708 | 0.748807 | -0.526789 | C | 0.186236 | 0.040534 | -0.683515 | O | 0.174723 | -1.171314 | -0.880801 | C | -1.091107 | 0.801430 | -0.582878 | C | -1.156733 | 2.190337 | -0.770938 |
| C                                                                                                                                                                                                                                                                                                                                                                                                                                                                                                                                                                                                                                                                                                                                                                                                                                                                                                                                                                                                                                                                                                                                                                                                                                                | 2.507237                                                                            | -1.037350 | -1.519108 |           |   |          |           |           |   |          |           |           |   |          |           |          |   |          |          |          |   |          |          |           |   |          |          |          |   |          |          |          |   |          |          |          |   |          |          |          |   |          |           |           |   |          |          |           |   |           |          |           |   |           |          |           |   |           |           |           |   |           |          |           |                                                                                                                                                                                                                                                                                                                                                                                                                                                                                                                                                                                                                                                                                                                                                                                                                                                                                                                                                                                                                                                                                                                                                                                                                                               |   |          |           |           |   |          |           |           |   |          |           |           |   |          |          |          |   |          |          |          |   |          |          |           |   |          |          |          |   |          |          |          |   |          |          |          |   |          |          |          |   |          |           |           |   |          |          |           |   |          |          |           |   |          |           |           |   |           |          |           |   |           |          |           |
| C                                                                                                                                                                                                                                                                                                                                                                                                                                                                                                                                                                                                                                                                                                                                                                                                                                                                                                                                                                                                                                                                                                                                                                                                                                                | 3.721191                                                                            | -1.750193 | -1.555088 |           |   |          |           |           |   |          |           |           |   |          |           |          |   |          |          |          |   |          |          |           |   |          |          |          |   |          |          |          |   |          |          |          |   |          |          |          |   |          |           |           |   |          |          |           |   |           |          |           |   |           |          |           |   |           |           |           |   |           |          |           |                                                                                                                                                                                                                                                                                                                                                                                                                                                                                                                                                                                                                                                                                                                                                                                                                                                                                                                                                                                                                                                                                                                                                                                                                                               |   |          |           |           |   |          |           |           |   |          |           |           |   |          |          |          |   |          |          |          |   |          |          |           |   |          |          |          |   |          |          |          |   |          |          |          |   |          |          |          |   |          |           |           |   |          |          |           |   |          |          |           |   |          |           |           |   |           |          |           |   |           |          |           |
| C                                                                                                                                                                                                                                                                                                                                                                                                                                                                                                                                                                                                                                                                                                                                                                                                                                                                                                                                                                                                                                                                                                                                                                                                                                                | 4.769630                                                                            | -1.375772 | -0.745395 |           |   |          |           |           |   |          |           |           |   |          |           |          |   |          |          |          |   |          |          |           |   |          |          |          |   |          |          |          |   |          |          |          |   |          |          |          |   |          |           |           |   |          |          |           |   |           |          |           |   |           |          |           |   |           |           |           |   |           |          |           |                                                                                                                                                                                                                                                                                                                                                                                                                                                                                                                                                                                                                                                                                                                                                                                                                                                                                                                                                                                                                                                                                                                                                                                                                                               |   |          |           |           |   |          |           |           |   |          |           |           |   |          |          |          |   |          |          |          |   |          |          |           |   |          |          |          |   |          |          |          |   |          |          |          |   |          |          |          |   |          |           |           |   |          |          |           |   |          |          |           |   |          |           |           |   |           |          |           |   |           |          |           |
| C                                                                                                                                                                                                                                                                                                                                                                                                                                                                                                                                                                                                                                                                                                                                                                                                                                                                                                                                                                                                                                                                                                                                                                                                                                                | 4.608216                                                                            | -0.279362 | 0.153018  |           |   |          |           |           |   |          |           |           |   |          |           |          |   |          |          |          |   |          |          |           |   |          |          |          |   |          |          |          |   |          |          |          |   |          |          |          |   |          |           |           |   |          |          |           |   |           |          |           |   |           |          |           |   |           |           |           |   |           |          |           |                                                                                                                                                                                                                                                                                                                                                                                                                                                                                                                                                                                                                                                                                                                                                                                                                                                                                                                                                                                                                                                                                                                                                                                                                                               |   |          |           |           |   |          |           |           |   |          |           |           |   |          |          |          |   |          |          |          |   |          |          |           |   |          |          |          |   |          |          |          |   |          |          |          |   |          |          |          |   |          |           |           |   |          |          |           |   |          |          |           |   |          |           |           |   |           |          |           |   |           |          |           |
| C                                                                                                                                                                                                                                                                                                                                                                                                                                                                                                                                                                                                                                                                                                                                                                                                                                                                                                                                                                                                                                                                                                                                                                                                                                                | 3.364552                                                                            | 0.417192  | 0.216361  |           |   |          |           |           |   |          |           |           |   |          |           |          |   |          |          |          |   |          |          |           |   |          |          |          |   |          |          |          |   |          |          |          |   |          |          |          |   |          |           |           |   |          |          |           |   |           |          |           |   |           |          |           |   |           |           |           |   |           |          |           |                                                                                                                                                                                                                                                                                                                                                                                                                                                                                                                                                                                                                                                                                                                                                                                                                                                                                                                                                                                                                                                                                                                                                                                                                                               |   |          |           |           |   |          |           |           |   |          |           |           |   |          |          |          |   |          |          |          |   |          |          |           |   |          |          |          |   |          |          |          |   |          |          |          |   |          |          |          |   |          |           |           |   |          |          |           |   |          |          |           |   |          |           |           |   |           |          |           |   |           |          |           |
| C                                                                                                                                                                                                                                                                                                                                                                                                                                                                                                                                                                                                                                                                                                                                                                                                                                                                                                                                                                                                                                                                                                                                                                                                                                                | 2.315340                                                                            | 0.029514  | -0.665970 |           |   |          |           |           |   |          |           |           |   |          |           |          |   |          |          |          |   |          |          |           |   |          |          |          |   |          |          |          |   |          |          |          |   |          |          |          |   |          |           |           |   |          |          |           |   |           |          |           |   |           |          |           |   |           |           |           |   |           |          |           |                                                                                                                                                                                                                                                                                                                                                                                                                                                                                                                                                                                                                                                                                                                                                                                                                                                                                                                                                                                                                                                                                                                                                                                                                                               |   |          |           |           |   |          |           |           |   |          |           |           |   |          |          |          |   |          |          |          |   |          |          |           |   |          |          |          |   |          |          |          |   |          |          |          |   |          |          |          |   |          |           |           |   |          |          |           |   |          |          |           |   |          |           |           |   |           |          |           |   |           |          |           |
| N                                                                                                                                                                                                                                                                                                                                                                                                                                                                                                                                                                                                                                                                                                                                                                                                                                                                                                                                                                                                                                                                                                                                                                                                                                                | 5.678184                                                                            | 0.028034  | 0.930340  |           |   |          |           |           |   |          |           |           |   |          |           |          |   |          |          |          |   |          |          |           |   |          |          |          |   |          |          |          |   |          |          |          |   |          |          |          |   |          |           |           |   |          |          |           |   |           |          |           |   |           |          |           |   |           |           |           |   |           |          |           |                                                                                                                                                                                                                                                                                                                                                                                                                                                                                                                                                                                                                                                                                                                                                                                                                                                                                                                                                                                                                                                                                                                                                                                                                                               |   |          |           |           |   |          |           |           |   |          |           |           |   |          |          |          |   |          |          |          |   |          |          |           |   |          |          |          |   |          |          |          |   |          |          |          |   |          |          |          |   |          |           |           |   |          |          |           |   |          |          |           |   |          |           |           |   |           |          |           |   |           |          |           |
| C                                                                                                                                                                                                                                                                                                                                                                                                                                                                                                                                                                                                                                                                                                                                                                                                                                                                                                                                                                                                                                                                                                                                                                                                                                                | 5.559553                                                                            | 1.008751  | 1.799937  |           |   |          |           |           |   |          |           |           |   |          |           |          |   |          |          |          |   |          |          |           |   |          |          |          |   |          |          |          |   |          |          |          |   |          |          |          |   |          |           |           |   |          |          |           |   |           |          |           |   |           |          |           |   |           |           |           |   |           |          |           |                                                                                                                                                                                                                                                                                                                                                                                                                                                                                                                                                                                                                                                                                                                                                                                                                                                                                                                                                                                                                                                                                                                                                                                                                                               |   |          |           |           |   |          |           |           |   |          |           |           |   |          |          |          |   |          |          |          |   |          |          |           |   |          |          |          |   |          |          |          |   |          |          |          |   |          |          |          |   |          |           |           |   |          |          |           |   |          |          |           |   |          |           |           |   |           |          |           |   |           |          |           |
| C                                                                                                                                                                                                                                                                                                                                                                                                                                                                                                                                                                                                                                                                                                                                                                                                                                                                                                                                                                                                                                                                                                                                                                                                                                                | 4.365533                                                                            | 1.744779  | 1.970536  |           |   |          |           |           |   |          |           |           |   |          |           |          |   |          |          |          |   |          |          |           |   |          |          |          |   |          |          |          |   |          |          |          |   |          |          |          |   |          |           |           |   |          |          |           |   |           |          |           |   |           |          |           |   |           |           |           |   |           |          |           |                                                                                                                                                                                                                                                                                                                                                                                                                                                                                                                                                                                                                                                                                                                                                                                                                                                                                                                                                                                                                                                                                                                                                                                                                                               |   |          |           |           |   |          |           |           |   |          |           |           |   |          |          |          |   |          |          |          |   |          |          |           |   |          |          |          |   |          |          |          |   |          |          |          |   |          |          |          |   |          |           |           |   |          |          |           |   |          |          |           |   |          |           |           |   |           |          |           |   |           |          |           |
| C                                                                                                                                                                                                                                                                                                                                                                                                                                                                                                                                                                                                                                                                                                                                                                                                                                                                                                                                                                                                                                                                                                                                                                                                                                                | 3.276779                                                                            | 1.448309  | 1.184804  |           |   |          |           |           |   |          |           |           |   |          |           |          |   |          |          |          |   |          |          |           |   |          |          |          |   |          |          |          |   |          |          |          |   |          |          |          |   |          |           |           |   |          |          |           |   |           |          |           |   |           |          |           |   |           |           |           |   |           |          |           |                                                                                                                                                                                                                                                                                                                                                                                                                                                                                                                                                                                                                                                                                                                                                                                                                                                                                                                                                                                                                                                                                                                                                                                                                                               |   |          |           |           |   |          |           |           |   |          |           |           |   |          |          |          |   |          |          |          |   |          |          |           |   |          |          |          |   |          |          |          |   |          |          |          |   |          |          |          |   |          |           |           |   |          |          |           |   |          |          |           |   |          |           |           |   |           |          |           |   |           |          |           |
| O                                                                                                                                                                                                                                                                                                                                                                                                                                                                                                                                                                                                                                                                                                                                                                                                                                                                                                                                                                                                                                                                                                                                                                                                                                                | 5.951811                                                                            | -2.025493 | -0.777317 |           |   |          |           |           |   |          |           |           |   |          |           |          |   |          |          |          |   |          |          |           |   |          |          |          |   |          |          |          |   |          |          |          |   |          |          |          |   |          |           |           |   |          |          |           |   |           |          |           |   |           |          |           |   |           |           |           |   |           |          |           |                                                                                                                                                                                                                                                                                                                                                                                                                                                                                                                                                                                                                                                                                                                                                                                                                                                                                                                                                                                                                                                                                                                                                                                                                                               |   |          |           |           |   |          |           |           |   |          |           |           |   |          |          |          |   |          |          |          |   |          |          |           |   |          |          |          |   |          |          |          |   |          |          |          |   |          |          |          |   |          |           |           |   |          |          |           |   |          |          |           |   |          |           |           |   |           |          |           |   |           |          |           |
| N                                                                                                                                                                                                                                                                                                                                                                                                                                                                                                                                                                                                                                                                                                                                                                                                                                                                                                                                                                                                                                                                                                                                                                                                                                                | 1.098369                                                                            | 0.765198  | -0.663554 |           |   |          |           |           |   |          |           |           |   |          |           |          |   |          |          |          |   |          |          |           |   |          |          |          |   |          |          |          |   |          |          |          |   |          |          |          |   |          |           |           |   |          |          |           |   |           |          |           |   |           |          |           |   |           |           |           |   |           |          |           |                                                                                                                                                                                                                                                                                                                                                                                                                                                                                                                                                                                                                                                                                                                                                                                                                                                                                                                                                                                                                                                                                                                                                                                                                                               |   |          |           |           |   |          |           |           |   |          |           |           |   |          |          |          |   |          |          |          |   |          |          |           |   |          |          |          |   |          |          |          |   |          |          |          |   |          |          |          |   |          |           |           |   |          |          |           |   |          |          |           |   |          |           |           |   |           |          |           |   |           |          |           |
| C                                                                                                                                                                                                                                                                                                                                                                                                                                                                                                                                                                                                                                                                                                                                                                                                                                                                                                                                                                                                                                                                                                                                                                                                                                                | -0.158174                                                                           | 0.219299  | -0.585920 |           |   |          |           |           |   |          |           |           |   |          |           |          |   |          |          |          |   |          |          |           |   |          |          |          |   |          |          |          |   |          |          |          |   |          |          |          |   |          |           |           |   |          |          |           |   |           |          |           |   |           |          |           |   |           |           |           |   |           |          |           |                                                                                                                                                                                                                                                                                                                                                                                                                                                                                                                                                                                                                                                                                                                                                                                                                                                                                                                                                                                                                                                                                                                                                                                                                                               |   |          |           |           |   |          |           |           |   |          |           |           |   |          |          |          |   |          |          |          |   |          |          |           |   |          |          |          |   |          |          |          |   |          |          |          |   |          |          |          |   |          |           |           |   |          |          |           |   |          |          |           |   |          |           |           |   |           |          |           |   |           |          |           |
| C                                                                                                                                                                                                                                                                                                                                                                                                                                                                                                                                                                                                                                                                                                                                                                                                                                                                                                                                                                                                                                                                                                                                                                                                                                                | -1.314505                                                                           | 1.158940  | -0.634531 |           |   |          |           |           |   |          |           |           |   |          |           |          |   |          |          |          |   |          |          |           |   |          |          |          |   |          |          |          |   |          |          |          |   |          |          |          |   |          |           |           |   |          |          |           |   |           |          |           |   |           |          |           |   |           |           |           |   |           |          |           |                                                                                                                                                                                                                                                                                                                                                                                                                                                                                                                                                                                                                                                                                                                                                                                                                                                                                                                                                                                                                                                                                                                                                                                                                                               |   |          |           |           |   |          |           |           |   |          |           |           |   |          |          |          |   |          |          |          |   |          |          |           |   |          |          |          |   |          |          |          |   |          |          |          |   |          |          |          |   |          |           |           |   |          |          |           |   |          |          |           |   |          |           |           |   |           |          |           |   |           |          |           |
| O                                                                                                                                                                                                                                                                                                                                                                                                                                                                                                                                                                                                                                                                                                                                                                                                                                                                                                                                                                                                                                                                                                                                                                                                                                                | -0.339345                                                                           | -0.988746 | -0.459237 |           |   |          |           |           |   |          |           |           |   |          |           |          |   |          |          |          |   |          |          |           |   |          |          |          |   |          |          |          |   |          |          |          |   |          |          |          |   |          |           |           |   |          |          |           |   |           |          |           |   |           |          |           |   |           |           |           |   |           |          |           |                                                                                                                                                                                                                                                                                                                                                                                                                                                                                                                                                                                                                                                                                                                                                                                                                                                                                                                                                                                                                                                                                                                                                                                                                                               |   |          |           |           |   |          |           |           |   |          |           |           |   |          |          |          |   |          |          |          |   |          |          |           |   |          |          |          |   |          |          |          |   |          |          |          |   |          |          |          |   |          |           |           |   |          |          |           |   |          |          |           |   |          |           |           |   |           |          |           |   |           |          |           |
| C                                                                                                                                                                                                                                                                                                                                                                                                                                                                                                                                                                                                                                                                                                                                                                                                                                                                                                                                                                                                                                                                                                                                                                                                                                                | -1.199354                                                                           | 2.465762  | -1.135901 |           |   |          |           |           |   |          |           |           |   |          |           |          |   |          |          |          |   |          |          |           |   |          |          |          |   |          |          |          |   |          |          |          |   |          |          |          |   |          |           |           |   |          |          |           |   |           |          |           |   |           |          |           |   |           |           |           |   |           |          |           |                                                                                                                                                                                                                                                                                                                                                                                                                                                                                                                                                                                                                                                                                                                                                                                                                                                                                                                                                                                                                                                                                                                                                                                                                                               |   |          |           |           |   |          |           |           |   |          |           |           |   |          |          |          |   |          |          |          |   |          |          |           |   |          |          |          |   |          |          |          |   |          |          |          |   |          |          |          |   |          |           |           |   |          |          |           |   |          |          |           |   |          |           |           |   |           |          |           |   |           |          |           |
| C                                                                                                                                                                                                                                                                                                                                                                                                                                                                                                                                                                                                                                                                                                                                                                                                                                                                                                                                                                                                                                                                                                                                                                                                                                                | 3.025375                                                                            | -0.598322 | -1.689178 |           |   |          |           |           |   |          |           |           |   |          |           |          |   |          |          |          |   |          |          |           |   |          |          |          |   |          |          |          |   |          |          |          |   |          |          |          |   |          |           |           |   |          |          |           |   |           |          |           |   |           |          |           |   |           |           |           |   |           |          |           |                                                                                                                                                                                                                                                                                                                                                                                                                                                                                                                                                                                                                                                                                                                                                                                                                                                                                                                                                                                                                                                                                                                                                                                                                                               |   |          |           |           |   |          |           |           |   |          |           |           |   |          |          |          |   |          |          |          |   |          |          |           |   |          |          |          |   |          |          |          |   |          |          |          |   |          |          |          |   |          |           |           |   |          |          |           |   |          |          |           |   |          |           |           |   |           |          |           |   |           |          |           |
| C                                                                                                                                                                                                                                                                                                                                                                                                                                                                                                                                                                                                                                                                                                                                                                                                                                                                                                                                                                                                                                                                                                                                                                                                                                                | 4.332409                                                                            | -1.104983 | -1.821232 |           |   |          |           |           |   |          |           |           |   |          |           |          |   |          |          |          |   |          |          |           |   |          |          |          |   |          |          |          |   |          |          |          |   |          |          |          |   |          |           |           |   |          |          |           |   |           |          |           |   |           |          |           |   |           |           |           |   |           |          |           |                                                                                                                                                                                                                                                                                                                                                                                                                                                                                                                                                                                                                                                                                                                                                                                                                                                                                                                                                                                                                                                                                                                                                                                                                                               |   |          |           |           |   |          |           |           |   |          |           |           |   |          |          |          |   |          |          |          |   |          |          |           |   |          |          |          |   |          |          |          |   |          |          |          |   |          |          |          |   |          |           |           |   |          |          |           |   |          |          |           |   |          |           |           |   |           |          |           |   |           |          |           |
| C                                                                                                                                                                                                                                                                                                                                                                                                                                                                                                                                                                                                                                                                                                                                                                                                                                                                                                                                                                                                                                                                                                                                                                                                                                                | 5.301008                                                                            | -0.775905 | -0.900044 |           |   |          |           |           |   |          |           |           |   |          |           |          |   |          |          |          |   |          |          |           |   |          |          |          |   |          |          |          |   |          |          |          |   |          |          |          |   |          |           |           |   |          |          |           |   |           |          |           |   |           |          |           |   |           |           |           |   |           |          |           |                                                                                                                                                                                                                                                                                                                                                                                                                                                                                                                                                                                                                                                                                                                                                                                                                                                                                                                                                                                                                                                                                                                                                                                                                                               |   |          |           |           |   |          |           |           |   |          |           |           |   |          |          |          |   |          |          |          |   |          |          |           |   |          |          |          |   |          |          |          |   |          |          |          |   |          |          |          |   |          |           |           |   |          |          |           |   |          |          |           |   |          |           |           |   |           |          |           |   |           |          |           |
| C                                                                                                                                                                                                                                                                                                                                                                                                                                                                                                                                                                                                                                                                                                                                                                                                                                                                                                                                                                                                                                                                                                                                                                                                                                                | 4.964327                                                                            | 0.059357  | 0.206465  |           |   |          |           |           |   |          |           |           |   |          |           |          |   |          |          |          |   |          |          |           |   |          |          |          |   |          |          |          |   |          |          |          |   |          |          |          |   |          |           |           |   |          |          |           |   |           |          |           |   |           |          |           |   |           |           |           |   |           |          |           |                                                                                                                                                                                                                                                                                                                                                                                                                                                                                                                                                                                                                                                                                                                                                                                                                                                                                                                                                                                                                                                                                                                                                                                                                                               |   |          |           |           |   |          |           |           |   |          |           |           |   |          |          |          |   |          |          |          |   |          |          |           |   |          |          |          |   |          |          |          |   |          |          |          |   |          |          |          |   |          |           |           |   |          |          |           |   |          |          |           |   |          |           |           |   |           |          |           |   |           |          |           |
| C                                                                                                                                                                                                                                                                                                                                                                                                                                                                                                                                                                                                                                                                                                                                                                                                                                                                                                                                                                                                                                                                                                                                                                                                                                                | 3.629874                                                                            | 0.540779  | 0.360812  |           |   |          |           |           |   |          |           |           |   |          |           |          |   |          |          |          |   |          |          |           |   |          |          |          |   |          |          |          |   |          |          |          |   |          |          |          |   |          |           |           |   |          |          |           |   |           |          |           |   |           |          |           |   |           |           |           |   |           |          |           |                                                                                                                                                                                                                                                                                                                                                                                                                                                                                                                                                                                                                                                                                                                                                                                                                                                                                                                                                                                                                                                                                                                                                                                                                                               |   |          |           |           |   |          |           |           |   |          |           |           |   |          |          |          |   |          |          |          |   |          |          |           |   |          |          |          |   |          |          |          |   |          |          |          |   |          |          |          |   |          |           |           |   |          |          |           |   |          |          |           |   |          |           |           |   |           |          |           |   |           |          |           |
| C                                                                                                                                                                                                                                                                                                                                                                                                                                                                                                                                                                                                                                                                                                                                                                                                                                                                                                                                                                                                                                                                                                                                                                                                                                                | 2.663301                                                                            | 0.212705  | -0.633245 |           |   |          |           |           |   |          |           |           |   |          |           |          |   |          |          |          |   |          |          |           |   |          |          |          |   |          |          |          |   |          |          |          |   |          |          |          |   |          |           |           |   |          |          |           |   |           |          |           |   |           |          |           |   |           |           |           |   |           |          |           |                                                                                                                                                                                                                                                                                                                                                                                                                                                                                                                                                                                                                                                                                                                                                                                                                                                                                                                                                                                                                                                                                                                                                                                                                                               |   |          |           |           |   |          |           |           |   |          |           |           |   |          |          |          |   |          |          |          |   |          |          |           |   |          |          |          |   |          |          |          |   |          |          |          |   |          |          |          |   |          |           |           |   |          |          |           |   |          |          |           |   |          |           |           |   |           |          |           |   |           |          |           |
| N                                                                                                                                                                                                                                                                                                                                                                                                                                                                                                                                                                                                                                                                                                                                                                                                                                                                                                                                                                                                                                                                                                                                                                                                                                                | 5.965349                                                                            | 0.336768  | 1.080745  |           |   |          |           |           |   |          |           |           |   |          |           |          |   |          |          |          |   |          |          |           |   |          |          |          |   |          |          |          |   |          |          |          |   |          |          |          |   |          |           |           |   |          |          |           |   |           |          |           |   |           |          |           |   |           |           |           |   |           |          |           |                                                                                                                                                                                                                                                                                                                                                                                                                                                                                                                                                                                                                                                                                                                                                                                                                                                                                                                                                                                                                                                                                                                                                                                                                                               |   |          |           |           |   |          |           |           |   |          |           |           |   |          |          |          |   |          |          |          |   |          |          |           |   |          |          |          |   |          |          |          |   |          |          |          |   |          |          |          |   |          |           |           |   |          |          |           |   |          |          |           |   |          |           |           |   |           |          |           |   |           |          |           |
| C                                                                                                                                                                                                                                                                                                                                                                                                                                                                                                                                                                                                                                                                                                                                                                                                                                                                                                                                                                                                                                                                                                                                                                                                                                                | 5.690847                                                                            | 1.076294  | 2.134079  |           |   |          |           |           |   |          |           |           |   |          |           |          |   |          |          |          |   |          |          |           |   |          |          |          |   |          |          |          |   |          |          |          |   |          |          |          |   |          |           |           |   |          |          |           |   |           |          |           |   |           |          |           |   |           |           |           |   |           |          |           |                                                                                                                                                                                                                                                                                                                                                                                                                                                                                                                                                                                                                                                                                                                                                                                                                                                                                                                                                                                                                                                                                                                                                                                                                                               |   |          |           |           |   |          |           |           |   |          |           |           |   |          |          |          |   |          |          |          |   |          |          |           |   |          |          |          |   |          |          |          |   |          |          |          |   |          |          |          |   |          |           |           |   |          |          |           |   |          |          |           |   |          |           |           |   |           |          |           |   |           |          |           |
| C                                                                                                                                                                                                                                                                                                                                                                                                                                                                                                                                                                                                                                                                                                                                                                                                                                                                                                                                                                                                                                                                                                                                                                                                                                                | 4.398681                                                                            | 1.580427  | 2.403355  |           |   |          |           |           |   |          |           |           |   |          |           |          |   |          |          |          |   |          |          |           |   |          |          |          |   |          |          |          |   |          |          |          |   |          |          |          |   |          |           |           |   |          |          |           |   |           |          |           |   |           |          |           |   |           |           |           |   |           |          |           |                                                                                                                                                                                                                                                                                                                                                                                                                                                                                                                                                                                                                                                                                                                                                                                                                                                                                                                                                                                                                                                                                                                                                                                                                                               |   |          |           |           |   |          |           |           |   |          |           |           |   |          |          |          |   |          |          |          |   |          |          |           |   |          |          |          |   |          |          |          |   |          |          |          |   |          |          |          |   |          |           |           |   |          |          |           |   |          |          |           |   |          |           |           |   |           |          |           |   |           |          |           |
| C                                                                                                                                                                                                                                                                                                                                                                                                                                                                                                                                                                                                                                                                                                                                                                                                                                                                                                                                                                                                                                                                                                                                                                                                                                                | 3.377041                                                                            | 1.311084  | 1.523391  |           |   |          |           |           |   |          |           |           |   |          |           |          |   |          |          |          |   |          |          |           |   |          |          |          |   |          |          |          |   |          |          |          |   |          |          |          |   |          |           |           |   |          |          |           |   |           |          |           |   |           |          |           |   |           |           |           |   |           |          |           |                                                                                                                                                                                                                                                                                                                                                                                                                                                                                                                                                                                                                                                                                                                                                                                                                                                                                                                                                                                                                                                                                                                                                                                                                                               |   |          |           |           |   |          |           |           |   |          |           |           |   |          |          |          |   |          |          |          |   |          |          |           |   |          |          |          |   |          |          |          |   |          |          |          |   |          |          |          |   |          |           |           |   |          |          |           |   |          |          |           |   |          |           |           |   |           |          |           |   |           |          |           |
| O                                                                                                                                                                                                                                                                                                                                                                                                                                                                                                                                                                                                                                                                                                                                                                                                                                                                                                                                                                                                                                                                                                                                                                                                                                                | 6.566791                                                                            | -1.227627 | -1.016602 |           |   |          |           |           |   |          |           |           |   |          |           |          |   |          |          |          |   |          |          |           |   |          |          |          |   |          |          |          |   |          |          |          |   |          |          |          |   |          |           |           |   |          |          |           |   |           |          |           |   |           |          |           |   |           |           |           |   |           |          |           |                                                                                                                                                                                                                                                                                                                                                                                                                                                                                                                                                                                                                                                                                                                                                                                                                                                                                                                                                                                                                                                                                                                                                                                                                                               |   |          |           |           |   |          |           |           |   |          |           |           |   |          |          |          |   |          |          |          |   |          |          |           |   |          |          |          |   |          |          |          |   |          |          |          |   |          |          |          |   |          |           |           |   |          |          |           |   |          |          |           |   |          |           |           |   |           |          |           |   |           |          |           |
| N                                                                                                                                                                                                                                                                                                                                                                                                                                                                                                                                                                                                                                                                                                                                                                                                                                                                                                                                                                                                                                                                                                                                                                                                                                                | 1.350708                                                                            | 0.748807  | -0.526789 |           |   |          |           |           |   |          |           |           |   |          |           |          |   |          |          |          |   |          |          |           |   |          |          |          |   |          |          |          |   |          |          |          |   |          |          |          |   |          |           |           |   |          |          |           |   |           |          |           |   |           |          |           |   |           |           |           |   |           |          |           |                                                                                                                                                                                                                                                                                                                                                                                                                                                                                                                                                                                                                                                                                                                                                                                                                                                                                                                                                                                                                                                                                                                                                                                                                                               |   |          |           |           |   |          |           |           |   |          |           |           |   |          |          |          |   |          |          |          |   |          |          |           |   |          |          |          |   |          |          |          |   |          |          |          |   |          |          |          |   |          |           |           |   |          |          |           |   |          |          |           |   |          |           |           |   |           |          |           |   |           |          |           |
| C                                                                                                                                                                                                                                                                                                                                                                                                                                                                                                                                                                                                                                                                                                                                                                                                                                                                                                                                                                                                                                                                                                                                                                                                                                                | 0.186236                                                                            | 0.040534  | -0.683515 |           |   |          |           |           |   |          |           |           |   |          |           |          |   |          |          |          |   |          |          |           |   |          |          |          |   |          |          |          |   |          |          |          |   |          |          |          |   |          |           |           |   |          |          |           |   |           |          |           |   |           |          |           |   |           |           |           |   |           |          |           |                                                                                                                                                                                                                                                                                                                                                                                                                                                                                                                                                                                                                                                                                                                                                                                                                                                                                                                                                                                                                                                                                                                                                                                                                                               |   |          |           |           |   |          |           |           |   |          |           |           |   |          |          |          |   |          |          |          |   |          |          |           |   |          |          |          |   |          |          |          |   |          |          |          |   |          |          |          |   |          |           |           |   |          |          |           |   |          |          |           |   |          |           |           |   |           |          |           |   |           |          |           |
| O                                                                                                                                                                                                                                                                                                                                                                                                                                                                                                                                                                                                                                                                                                                                                                                                                                                                                                                                                                                                                                                                                                                                                                                                                                                | 0.174723                                                                            | -1.171314 | -0.880801 |           |   |          |           |           |   |          |           |           |   |          |           |          |   |          |          |          |   |          |          |           |   |          |          |          |   |          |          |          |   |          |          |          |   |          |          |          |   |          |           |           |   |          |          |           |   |           |          |           |   |           |          |           |   |           |           |           |   |           |          |           |                                                                                                                                                                                                                                                                                                                                                                                                                                                                                                                                                                                                                                                                                                                                                                                                                                                                                                                                                                                                                                                                                                                                                                                                                                               |   |          |           |           |   |          |           |           |   |          |           |           |   |          |          |          |   |          |          |          |   |          |          |           |   |          |          |          |   |          |          |          |   |          |          |          |   |          |          |          |   |          |           |           |   |          |          |           |   |          |          |           |   |          |           |           |   |           |          |           |   |           |          |           |
| C                                                                                                                                                                                                                                                                                                                                                                                                                                                                                                                                                                                                                                                                                                                                                                                                                                                                                                                                                                                                                                                                                                                                                                                                                                                | -1.091107                                                                           | 0.801430  | -0.582878 |           |   |          |           |           |   |          |           |           |   |          |           |          |   |          |          |          |   |          |          |           |   |          |          |          |   |          |          |          |   |          |          |          |   |          |          |          |   |          |           |           |   |          |          |           |   |           |          |           |   |           |          |           |   |           |           |           |   |           |          |           |                                                                                                                                                                                                                                                                                                                                                                                                                                                                                                                                                                                                                                                                                                                                                                                                                                                                                                                                                                                                                                                                                                                                                                                                                                               |   |          |           |           |   |          |           |           |   |          |           |           |   |          |          |          |   |          |          |          |   |          |          |           |   |          |          |          |   |          |          |          |   |          |          |          |   |          |          |          |   |          |           |           |   |          |          |           |   |          |          |           |   |          |           |           |   |           |          |           |   |           |          |           |
| C                                                                                                                                                                                                                                                                                                                                                                                                                                                                                                                                                                                                                                                                                                                                                                                                                                                                                                                                                                                                                                                                                                                                                                                                                                                | -1.156733                                                                           | 2.190337  | -0.770938 |           |   |          |           |           |   |          |           |           |   |          |           |          |   |          |          |          |   |          |          |           |   |          |          |          |   |          |          |          |   |          |          |          |   |          |          |          |   |          |           |           |   |          |          |           |   |           |          |           |   |           |          |           |   |           |           |           |   |           |          |           |                                                                                                                                                                                                                                                                                                                                                                                                                                                                                                                                                                                                                                                                                                                                                                                                                                                                                                                                                                                                                                                                                                                                                                                                                                               |   |          |           |           |   |          |           |           |   |          |           |           |   |          |          |          |   |          |          |          |   |          |          |           |   |          |          |          |   |          |          |          |   |          |          |          |   |          |          |          |   |          |           |           |   |          |          |           |   |          |          |           |   |          |           |           |   |           |          |           |   |           |          |           |

|                                   |           |           |           |                                   |           |           |           |
|-----------------------------------|-----------|-----------|-----------|-----------------------------------|-----------|-----------|-----------|
| C                                 | -2.283129 | 3.331776  | -1.154235 | C                                 | -2.352845 | 2.885724  | -0.676168 |
| C                                 | -3.509477 | 2.892992  | -0.655782 | C                                 | -3.509754 | 2.166446  | -0.386504 |
| C                                 | -3.650346 | 1.596875  | -0.174630 | C                                 | -3.488096 | 0.789845  | -0.215782 |
| C                                 | -2.572090 | 0.708001  | -0.173913 | C                                 | -2.284416 | 0.090857  | -0.322849 |
| Se                                | -2.777207 | -1.135991 | 0.447457  | Se                                | -2.242838 | -1.857364 | -0.143080 |
| S                                 | -4.885172 | -1.102739 | 1.248349  | S                                 | -4.326084 | -2.272124 | 0.603816  |
| C                                 | -5.870990 | -1.590131 | -0.222875 | C                                 | -4.158671 | -2.031319 | 2.416109  |
| H                                 | 1.701387  | -1.340000 | -2.175717 | Cl                                | -5.038068 | 3.020718  | -0.256799 |
| H                                 | 3.843043  | -2.589180 | -2.230204 | H                                 | 2.284536  | -0.859371 | -2.433886 |
| H                                 | 6.433449  | 1.232146  | 2.406519  | H                                 | 4.588077  | -1.745614 | -2.657117 |
| H                                 | 4.316127  | 2.524016  | 2.722871  | H                                 | 6.513438  | 1.282992  | 2.813840  |
| H                                 | 2.345602  | 1.986965  | 1.325301  | H                                 | 4.223809  | 2.162042  | 3.301556  |
| H                                 | 6.528404  | -1.594750 | -0.120216 | H                                 | 2.374978  | 1.668836  | 1.735360  |
| H                                 | 1.171022  | 1.769657  | -0.648453 | H                                 | 7.064143  | -0.874910 | -0.256380 |
| H                                 | -0.258738 | 2.808292  | -1.556013 | H                                 | 1.273509  | 1.714325  | -0.250412 |
| H                                 | -2.174944 | 4.333225  | -1.556173 | H                                 | -0.265512 | 2.749376  | -1.037858 |
| H                                 | -4.366468 | 3.559216  | -0.650398 | H                                 | -2.392007 | 3.956096  | -0.834491 |
| H                                 | -4.607050 | 1.271034  | 0.215592  | H                                 | -4.408272 | 0.255052  | -0.014810 |
| H                                 | -6.903772 | -1.690472 | 0.117853  | H                                 | -5.117341 | -2.316614 | 2.854337  |
| H                                 | -5.824559 | -0.831030 | -1.003636 | H                                 | -3.952660 | -0.988971 | 2.658831  |
| H                                 | -5.531109 | -2.546593 | -0.617392 | H                                 | -3.375080 | -2.670346 | 2.820552  |
|                                   |           |           |           |                                   |           |           |           |
| <b>Selenenyl sulfides for 11c</b> |           |           |           | <b>Selenenyl sulfides for 11d</b> |           |           |           |
| Electronic Energy = -4175.8337781 |           |           |           | Electronic Energy = -3815.4809875 |           |           |           |
| C                                 | 2.763137  | -0.826068 | -1.649568 | C                                 | 2.775407  | -0.754078 | -1.637807 |
| C                                 | 4.052127  | -1.366400 | -1.820546 | C                                 | 4.048497  | -1.347135 | -1.739528 |
| C                                 | 5.052049  | -1.080309 | -0.919039 | C                                 | 5.038559  | -1.026532 | -0.838486 |
| C                                 | 4.765882  | -0.254432 | 0.208322  | C                                 | 4.757238  | -0.110824 | 0.218566  |
| C                                 | 3.449906  | 0.262547  | 0.403193  | C                                 | 3.455326  | 0.460086  | 0.344405  |
| C                                 | 2.450089  | -0.021394 | -0.572628 | C                                 | 2.467215  | 0.137061  | -0.630265 |
| N                                 | 5.795470  | -0.020200 | 1.061808  | N                                 | 5.775900  | 0.153636  | 1.076391  |
| C                                 | 5.569370  | 0.710100  | 2.132822  | C                                 | 5.550699  | 0.967414  | 2.085730  |
| C                                 | 4.299852  | 1.247080  | 2.441887  | C                                 | 4.292858  | 1.564671  | 2.325211  |

|                                                                                     |           |           |           |                                                                                      |           |           |           |
|-------------------------------------------------------------------------------------|-----------|-----------|-----------|--------------------------------------------------------------------------------------|-----------|-----------|-----------|
| C                                                                                   | 3.249484  | 1.020976  | 1.583784  | C                                                                                    | 3.254028  | 1.309008  | 1.461409  |
| O                                                                                   | 6.301247  | -1.565861 | -1.073964 | O                                                                                    | 6.274043  | -1.561131 | -0.929046 |
| N                                                                                   | 1.161450  | 0.557711  | -0.423214 | N                                                                                    | 1.193100  | 0.762478  | -0.555545 |
| C                                                                                   | -0.035979 | -0.067013 | -0.657014 | C                                                                                    | -0.017455 | 0.131239  | -0.695500 |
| O                                                                                   | -0.116282 | -1.248001 | -0.981385 | O                                                                                    | -0.111577 | -1.083814 | -0.847405 |
| C                                                                                   | -1.272687 | 0.750209  | -0.474987 | C                                                                                    | -1.238307 | 0.981973  | -0.632618 |
| C                                                                                   | -1.248562 | 2.151687  | -0.543502 | C                                                                                    | -1.204963 | 2.365125  | -0.870491 |
| C                                                                                   | -2.411736 | 2.882923  | -0.366593 | C                                                                                    | -2.349227 | 3.146524  | -0.806943 |
| C                                                                                   | -3.620439 | 2.237138  | -0.123266 | C                                                                                    | -3.543039 | 2.509550  | -0.499242 |
| C                                                                                   | -3.654307 | 0.849266  | -0.075885 | C                                                                                    | -3.631766 | 1.147909  | -0.279422 |
| C                                                                                   | -2.498835 | 0.085193  | -0.259305 | C                                                                                    | -2.479867 | 0.364036  | -0.354685 |
| Se                                                                                  | -2.565392 | -1.870138 | -0.251510 | Se                                                                                   | -2.574147 | -1.573520 | -0.106858 |
| S                                                                                   | -4.645180 | -2.232329 | 0.531767  | S                                                                                    | -4.684664 | -1.809781 | 0.643555  |
| C                                                                                   | -4.404867 | -2.159359 | 2.350187  | C                                                                                    | -4.502487 | -1.514380 | 2.446196  |
| Cl                                                                                  | -2.359971 | 4.636462  | -0.467319 | F                                                                                    | -4.671981 | 3.249810  | -0.429089 |
| H                                                                                   | 1.998416  | -1.055553 | -2.379541 | H                                                                                    | 2.017845  | -1.010998 | -2.366771 |
| H                                                                                   | 4.268611  | -2.000008 | -2.672715 | H                                                                                    | 4.261642  | -2.048733 | -2.537549 |
| H                                                                                   | 6.414356  | 0.881896  | 2.794564  | H                                                                                    | 6.386528  | 1.161341  | 2.753004  |
| H                                                                                   | 4.163743  | 1.819769  | 3.352385  | H                                                                                    | 4.156531  | 2.205722  | 3.188975  |
| H                                                                                   | 2.265245  | 1.405285  | 1.830235  | H                                                                                    | 2.276454  | 1.738652  | 1.653465  |
| H                                                                                   | 6.827094  | -1.239146 | -0.321392 | H                                                                                    | 6.794580  | -1.197054 | -0.190055 |
| H                                                                                   | 1.127303  | 1.495660  | -0.057976 | H                                                                                    | 1.180566  | 1.739933  | -0.313271 |
| H                                                                                   | -0.333976 | 2.683879  | -0.778007 | H                                                                                    | -0.275230 | 2.848734  | -1.152101 |
| H                                                                                   | -4.529584 | 2.811811  | 0.010526  | H                                                                                    | -2.329138 | 4.211795  | -1.001642 |
| H                                                                                   | -4.600531 | 0.349238  | 0.095114  | H                                                                                    | -4.596563 | 0.701573  | -0.068312 |
| H                                                                                   | -5.365973 | -2.418718 | 2.799201  | H                                                                                    | -5.481812 | -1.704459 | 2.890376  |
| H                                                                                   | -4.120678 | -1.157021 | 2.670144  | H                                                                                    | -4.213267 | -0.483443 | 2.649677  |
| H                                                                                   | -3.653394 | -2.879554 | 2.670420  | H                                                                                    | -3.773712 | -2.198282 | 2.878796  |
| 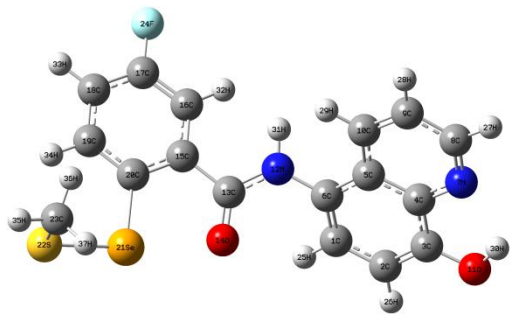 |           |           |           |  |           |           |           |
| <b>Selenenyl sulfides for 11e</b>                                                   |           |           |           | <b>Selenenyl sulfides for 11f</b>                                                    |           |           |           |
| Electronic Energy = -3815.4791866                                                   |           |           |           | Electronic Energy = -3815.4812844                                                    |           |           |           |
| C                                                                                   | 2.641164  | -0.874458 | -1.597332 | C                                                                                    | 2.347951  | -1.506523 | -0.976072 |
| C                                                                                   | 3.904761  | -1.482010 | -1.727808 | C                                                                                    | 3.538094  | -2.259970 | -0.982868 |

|    |           |           |           |    |           |           |            |
|----|-----------|-----------|-----------|----|-----------|-----------|------------|
| C  | 4.917243  | -1.179902 | -0.845816 | C  | 4.692012  | -1.748116 | -0.436211  |
| C  | 4.669152  | -0.266879 | 0.221716  | C  | 4.669894  | -0.453188 | 0.161171   |
| C  | 3.377682  | 0.320531  | 0.377668  | C  | 3.458424  | 0.300621  | 0.196886   |
| C  | 2.365216  | 0.015597  | -0.578792 | C  | 2.288102  | -0.248002 | -0.409824  |
| N  | 5.708924  | -0.020449 | 1.059269  | N  | 5.840915  | -0.013646 | 0.689626   |
| C  | 5.516844  | 0.791662  | 2.076665  | C  | 5.862344  | 1.164096  | 1.276348   |
| C  | 4.272864  | 1.404747  | 2.345303  | C  | 4.718430  | 1.983975  | 1.392392   |
| C  | 3.212547  | 1.166637  | 1.502797  | C  | 3.526856  | 1.552500  | 0.858357   |
| O  | 6.143589  | -1.729856 | -0.964743 | O  | 5.848622  | -2.444104 | -0.446911  |
| N  | 1.105484  | 0.662807  | -0.472937 | N  | 1.112882  | 0.548887  | -0.435519  |
| C  | -0.120975 | 0.086742  | -0.682473 | C  | -0.172554 | 0.097332  | -0.356487  |
| O  | -0.260246 | -1.105060 | -0.939704 | O  | -0.440566 | -1.100235 | -0.248391  |
| C  | -1.312997 | 0.977468  | -0.560409 | C  | -1.296321 | 1.083931  | -0.402199  |
| C  | -1.212655 | 2.370007  | -0.712640 | C  | -1.161683 | 2.469738  | -0.572585  |
| C  | -2.341297 | 3.154714  | -0.592251 | C  | -2.215759 | 3.354952  | -0.633041  |
| C  | -3.585836 | 2.605182  | -0.326392 | C  | -3.503615 | 2.83823   | -0.5148200 |
| C  | -3.691495 | 1.225905  | -0.193988 | C  | -3.701886 | 1.476216  | -0.335426  |
| C  | -2.574604 | 0.394096  | -0.316210 | C  | -2.622440 | 0.591948  | -0.272128  |
| Se | -2.746220 | -1.552915 | -0.187457 | Se | -2.930973 | -1.324547 | -0.011622  |
| S  | -4.840520 | -1.753415 | 0.613925  | S  | -5.180394 | -1.381636 | 0.225270   |
| C  | -4.593709 | -1.580480 | 2.424763  | C  | -5.390078 | -1.091693 | 2.026399   |
| F  | -2.227576 | 4.495556  | -0.752234 | F  | 0.090335  | 3.017961  | -0.694454  |
| H  | 1.866543  | -1.118950 | -2.311698 | H  | 1.458856  | -1.930371 | -1.420351  |
| H  | 4.092193  | -2.181141 | -2.534412 | H  | 3.553477  | -3.246715 | -1.430938  |
| H  | 6.369363  | 0.971056  | 2.726628  | H  | 6.815164  | 1.488452  | 1.686842   |
| H  | 4.163271  | 2.044185  | 3.213994  | H  | 4.787011  | 2.936289  | 1.906185   |
| H  | 2.246524  | 1.609874  | 1.720925  | H  | 2.640226  | 2.168148  | 0.965741   |
| H  | 6.684167  | -1.376273 | -0.235133 | H  | 6.515456  | -1.88921  | -0.0030110 |
| H  | 1.114699  | 1.619983  | -0.159963 | H  | 1.240602  | 1.541001  | -0.549494  |
| H  | -0.277759 | 2.854631  | -0.970915 | H  | -2.021261 | 4.411352  | -0.772446  |
| H  | -4.456164 | 3.246313  | -0.243429 | H  | -4.358428 | 3.504384  | -0.566232  |
| H  | -4.662742 | 0.785018  | -0.002959 | H  | -4.708978 | 1.085887  | -0.257562  |
| H  | -5.565690 | -1.762980 | 2.888034  | H  | -6.453668 | -1.217547 | 2.239208   |
| H  | -4.258713 | -0.575929 | 2.682812  | H  | -5.088209 | -0.081595 | 2.303390   |
| H  | -3.878747 | -2.316556 | 2.789421  | H  | -4.821519 | -1.819222 | 2.603893   |

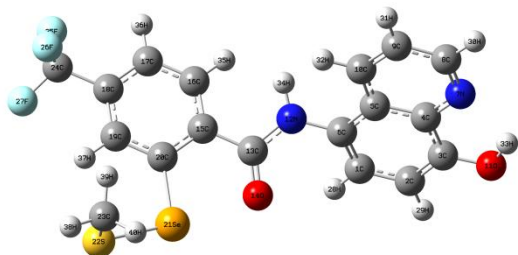

### Selenenyl sulfides for 11g

Electronic Energy = -4053.3875676

|    |            |           |           |
|----|------------|-----------|-----------|
| C  | 3.457253   | -0.596870 | -1.646513 |
| C  | 4.808322   | -0.970807 | -1.776404 |
| C  | 5.746028   | -0.511995 | -0.879149 |
| C  | 5.334671   | 0.322488  | 0.202516  |
| C  | 3.959382   | 0.670990  | 0.356678  |
| C  | 3.023427   | 0.211076  | -0.614990 |
| N  | 6.309564   | 0.729959  | 1.054767  |
| C  | 5.970920   | 1.473566  | 2.086269  |
| C  | 4.636647   | 1.852788  | 2.354377  |
| C  | 3.640137   | 1.451306  | 1.496204  |
| O  | 7.049939   | -0.836385 | -0.995477 |
| N  | 1.666801   | 0.622185  | -0.511794 |
| C  | 0.568448   | -0.173742 | -0.706375 |
| O  | 0.650265   | -1.375055 | -0.941633 |
| C  | -0.768375  | 0.484632  | -0.596678 |
| C  | -0.939280  | 1.862527  | -0.793645 |
| C  | -2.185579  | 2.461453  | -0.689186 |
| C  | -3.289661  | 1.664991  | -0.384961 |
| C  | -3.1486520 | 0.292407  | -0.209693 |
| C  | -1.898247  | -0.317730 | -0.324634 |
| Se | -1.706227  | -2.255562 | -0.141810 |
| S  | -3.732840  | -2.819677 | 0.653843  |
| C  | -3.547275  | -2.548804 | 2.460003  |
| C  | -4.646336  | 2.295602  | -0.202916 |
| F  | -4.760396  | 3.464048  | -0.872925 |
| F  | -4.891218  | 2.572721  | 1.104122  |
| F  | -5.647294  | 1.494259  | -0.621925 |
| H  | 2.741455   | -0.959327 | -2.372415 |
| H  | 5.121101   | -1.611296 | -2.592716 |
| H  | 6.774188   | 1.785949  | 2.748485  |

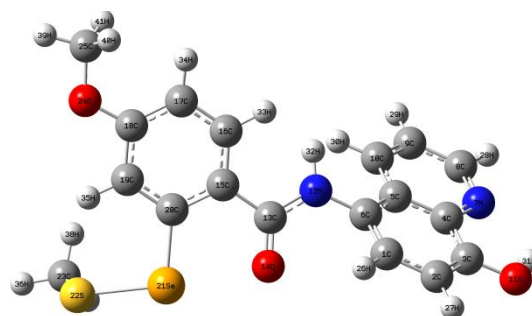

### Selenenyl sulfides for 11h

Electronic Energy = -4779.4812504

|    |           |           |           |
|----|-----------|-----------|-----------|
| C  | -2.994920 | -0.675034 | -1.636472 |
| C  | -4.305562 | -1.167882 | -1.786107 |
| C  | -5.294313 | -0.793718 | -0.904800 |
| C  | -4.975197 | 0.073828  | 0.181187  |
| C  | -3.637722 | 0.540902  | 0.356059  |
| C  | -2.648453 | 0.167771  | -0.599826 |
| N  | -5.995139 | 0.395388  | 1.018165  |
| C  | -5.737433 | 1.164881  | 2.054119  |
| C  | -4.445083 | 1.657277  | 2.343031  |
| C  | -3.404588 | 1.344088  | 1.500244  |
| O  | -6.564195 | -1.231579 | -1.041105 |
| N  | -1.335372 | 0.694143  | -0.476545 |
| C  | -0.168370 | -0.018335 | -0.620999 |
| O  | -0.165632 | -1.233305 | -0.805519 |
| C  | 1.106440  | 0.737313  | -0.525623 |
| C  | 1.179928  | 2.124845  | -0.696442 |
| C  | 2.378251  | 2.822207  | -0.611511 |
| C  | 3.552435  | 2.108250  | -0.346748 |
| C  | 3.507534  | 0.719401  | -0.193113 |
| C  | 2.310231  | 0.025804  | -0.290065 |
| Se | 2.263477  | -1.925242 | -0.126419 |
| S  | 4.366755  | -2.358606 | 0.553834  |
| C  | 4.259162  | -2.118275 | 2.370687  |
| O  | 4.784115  | 2.670318  | -0.236433 |
| C  | 4.919405  | 4.073442  | -0.420588 |
| H  | -2.238477 | -0.972771 | -2.350738 |
| H  | -4.547532 | -1.833981 | -2.606115 |
| H  | -6.574855 | 1.406318  | 2.703797  |
| H  | -4.284946 | 2.263953  | 3.227353  |
| H  | -2.402741 | 1.691934  | 1.729054  |

|                                                                                    |            |           |           |                                                                                     |           |           |           |
|------------------------------------------------------------------------------------|------------|-----------|-----------|-------------------------------------------------------------------------------------|-----------|-----------|-----------|
| H                                                                                  | 4.411036   | 2.443929  | 3.234837  | H                                                                                   | -7.075352 | -0.846659 | -0.306238 |
| H                                                                                  | 2.609378   | 1.713345  | 1.711070  | H                                                                                   | -1.256323 | 1.660978  | -0.206693 |
| H                                                                                  | 7.515681   | -0.409775 | -0.253316 | H                                                                                   | 0.287798  | 2.692030  | -0.943937 |
| H                                                                                  | 1.5014360  | 1.571024  | -0.216732 | H                                                                                   | 2.385508  | 3.893281  | -0.764592 |
| H                                                                                  | -0.0948230 | 2.482595  | -1.076237 | H                                                                                   | 4.437734  | 0.192417  | -0.015831 |
| H                                                                                  | -2.300004  | 3.524650  | -0.858648 | H                                                                                   | 5.228197  | -2.412036 | 2.779853  |
| H                                                                                  | -4.019355  | -0.317551 | 0.000429  | H                                                                                   | 3.482343  | -2.749921 | 2.799368  |
| H                                                                                  | -4.473915  | -2.899419 | 2.919112  | H                                                                                   | 4.069439  | -1.074114 | 2.619291  |
| H                                                                                  | -3.414886  | -1.491644 | 2.689430  | H                                                                                   | 5.978795  | 4.287030  | -0.294034 |
| H                                                                                  | -2.711112  | -3.124548 | 2.853964  | H                                                                                   | 4.606942  | 4.375248  | -1.425213 |
| 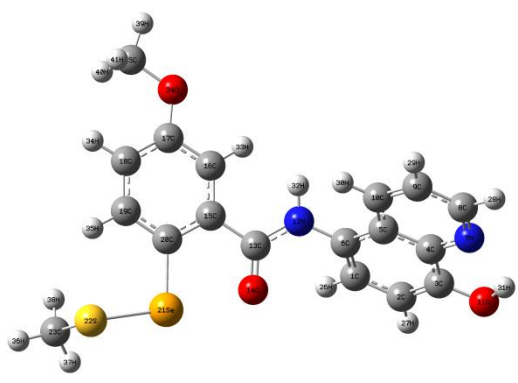 |            |           |           |  |           |           |           |
| <b>Selenenyl sulfides for 11i</b>                                                  |            |           |           | <b>Selenenyl sulfides for 11j</b>                                                   |           |           |           |
| Electronic Energy = -3830.7638115                                                  |            |           |           | Electronic Energy = -3945.3145056                                                   |           |           |           |
| C                                                                                  | 2.784981   | -0.945341 | -1.601612 | C                                                                                   | -3.162981 | -1.248460 | 1.268978  |
| C                                                                                  | 4.062576   | -1.512768 | -1.771850 | C                                                                                   | -4.467696 | -1.763247 | 1.397382  |
| C                                                                                  | 5.101888   | -1.144081 | -0.948123 | C                                                                                   | -5.522825 | -1.153782 | 0.757866  |
| C                                                                                  | 4.869078   | -0.204425 | 0.099578  | C                                                                                   | -5.281570 | -0.012236 | -0.062234 |
| C                                                                                  | 3.565308   | 0.341311  | 0.295713  | C                                                                                   | -3.954087 | 0.486750  | -0.223934 |
| C                                                                                  | 2.522682   | -0.031725 | -0.601415 | C                                                                                   | -2.890916 | -0.144539 | 0.486288  |
| N                                                                                  | 5.935339   | 0.106623  | 0.880771  | N                                                                                   | -6.365300 | 0.533529  | -0.671946 |
| C                                                                                  | 5.756755   | 0.943221  | 1.880831  | C                                                                                   | -6.184196 | 1.567888  | -1.465145 |
| C                                                                                  | 4.503332   | 1.518779  | 2.187007  | C                                                                                   | -4.911849 | 2.124929  | -1.722745 |
| C                                                                                  | 3.416702   | 1.216461  | 1.400493  | C                                                                                   | -3.806673 | 1.584816  | -1.108075 |
| O                                                                                  | 6.341762   | -1.653800 | -1.105122 | O                                                                                   | -6.786205 | -1.613204 | 0.884308  |
| N                                                                                  | 1.240833   | 0.564319  | -0.457882 | N                                                                                   | -1.583731 | 0.401527  | 0.388976  |
| C                                                                                  | 0.043048   | -0.103891 | -0.480886 | C                                                                                   | -0.418606 | -0.310988 | 0.257525  |
| O                                                                                  | -0.025903  | -1.324880 | -0.589450 | O                                                                                   | -0.415526 | -1.540441 | 0.179747  |
| C                                                                                  | -1.196448  | 0.715778  | -0.338589 | C                                                                                   | 0.855463  | 0.445658  | 0.191744  |
| C                                                                                  | -1.202447  | 2.093287  | -0.580400 | C                                                                                   | 0.940696  | 1.831724  | 0.418576  |
| C                                                                                  | -2.359325  | 2.854090  | -0.423621 | C                                                                                   | 2.126578  | 2.531597  | 0.311796  |
| C                                                                                  | -3.532381  | 2.220834  | -0.007008 | C                                                                                   | 3.297601  | 1.829104  | -0.054601 |
| C                                                                                  | -3.536564  | 0.846018  | 0.216064  | C                                                                                   | 3.239017  | 0.451001  | -0.244797 |

|                                                                                     |           |           |           |                                                                                      |           |            |           |
|-------------------------------------------------------------------------------------|-----------|-----------|-----------|--------------------------------------------------------------------------------------|-----------|------------|-----------|
| C                                                                                   | -2.394507 | 0.068492  | 0.040372  | C                                                                                    | 2.039988  | -0.252675  | -0.116102 |
| Se                                                                                  | -2.423394 | -1.872438 | 0.303599  | Se                                                                                   | 1.989349  | -2.192821  | -0.373714 |
| S                                                                                   | -4.502333 | -2.173345 | 1.120740  | S                                                                                    | 4.163680  | -2.628393  | -0.827550 |
| C                                                                                   | -5.484145 | -2.475050 | -0.402248 | C                                                                                    | 4.854288  | -2.9235690 | 0.848893  |
| O                                                                                   | -2.242080 | 4.185390  | -0.700992 | O                                                                                    | 2.109960  | 3.891718   | 0.479680  |
| C                                                                                   | -3.396112 | 5.005685  | -0.583454 | C                                                                                    | 2.843569  | 4.405198   | 1.597896  |
| H                                                                                   | 1.986764  | -1.240205 | -2.270325 | O                                                                                    | 4.423031  | 2.571851   | -0.203509 |
| H                                                                                   | 4.239317  | -2.232860 | -2.562309 | C                                                                                    | 5.613514  | 1.930938   | -0.653423 |
| H                                                                                   | 6.629474  | 1.174121  | 2.486348  | H                                                                                    | -2.352597 | -1.737904  | 1.792141  |
| H                                                                                   | 4.408219  | 2.180024  | 3.041019  | H                                                                                    | -4.650963 | -2.635658  | 2.013820  |
| H                                                                                   | 2.443434  | 1.629185  | 1.643859  | H                                                                                    | -7.071257 | 1.983627   | -1.936199 |
| H                                                                                   | 6.899352  | -1.257068 | -0.411297 | H                                                                                    | -4.817572 | 2.960408   | -2.407363 |
| H                                                                                   | 1.215947  | 1.550822  | -0.256353 | H                                                                                    | -2.822339 | 1.986887   | -1.323674 |
| H                                                                                   | -0.320189 | 2.612345  | -0.939235 | H                                                                                    | -7.351707 | -1.034512  | 0.341266  |
| H                                                                                   | -4.450120 | 2.776921  | 0.139355  | H                                                                                    | -1.515955 | 1.405571   | 0.386686  |
| H                                                                                   | -4.453900 | 0.374107  | 0.547779  | H                                                                                    | 0.074824  | 2.421336   | 0.701500  |
| H                                                                                   | -6.495386 | -2.724432 | -0.073304 | H                                                                                    | 4.129650  | -0.096925  | -0.523675 |
| H                                                                                   | -5.075807 | -3.312686 | -0.965831 | H                                                                                    | 5.892699  | -3.231986  | 0.709825  |
| H                                                                                   | -5.522471 | -1.588423 | -1.035052 | H                                                                                    | 4.310629  | -3.720141  | 1.354810  |
| H                                                                                   | -3.077064 | 6.008479  | -0.860846 | H                                                                                    | 4.826863  | -2.017449  | 1.454306  |
| H                                                                                   | -4.189764 | 4.677493  | -1.262547 | H                                                                                    | 2.671202  | 5.480580   | 1.599977  |
| H                                                                                   | -3.775025 | 5.018266  | 0.443715  | H                                                                                    | 2.467865  | 3.973992   | 2.532002  |
| 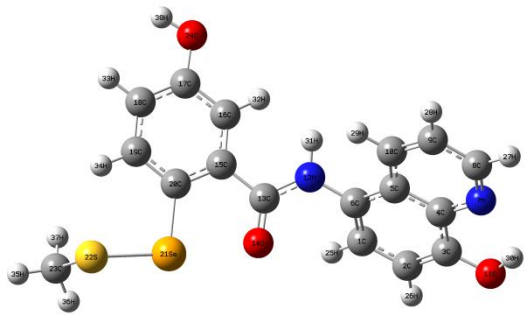 |           |           |           |  |           |            |           |
| <b>Selenenyl sulfides for 11k</b>                                                   |           |           |           | <b>Selenenyl sulfides for 12k</b>                                                    |           |            |           |
| Electronic Energy = -3791.4860181                                                   |           |           |           | Electronic Energy = -4251.0722251                                                    |           |            |           |
| C                                                                                   | 2.580291  | -1.113833 | -1.480216 | C                                                                                    | -2.453372 | -0.851912  | -0.958881 |
| C                                                                                   | 3.814714  | -1.782951 | -1.588602 | C                                                                                    | -3.766441 | -1.350163  | -0.844315 |
| C                                                                                   | 4.886055  | -1.394853 | -0.816599 | C                                                                                    | -4.711326 | -0.709278  | -0.071016 |
| C                                                                                   | 4.729445  | -0.328026 | 0.117272  | C                                                                                    | -4.320878 | 0.463554   | 0.641453  |



|    |           |           |           |    |           |           |           |
|----|-----------|-----------|-----------|----|-----------|-----------|-----------|
| C  | 3.467900  | 0.324758  | 0.254629  | C  | -2.985649 | 0.957554  | 0.56373   |
| C  | 2.392144  | -0.075794 | -0.590568 | C  | -2.055502 | 0.281068  | -0.281432 |
| N  | 5.823175  | -0.004372 | 0.853900  | N  | -5.289587 | 1.045233  | 1.394240  |
| C  | 5.713681  | 0.950597  | 1.752780  | C  | -4.980266 | 2.112118  | 2.100286  |
| C  | 4.506081  | 1.642486  | 1.995511  | C  | -3.683364 | 2.669587  | 2.121727  |
| C  | 3.392527  | 1.328643  | 1.252345  | C  | -2.694459 | 2.091861  | 1.359550  |
| O  | 6.086478  | -2.003314 | -0.918493 | O  | -5.975005 | -1.153173 | 0.036987  |
| N  | 1.157872  | 0.623088  | -0.511915 | N  | -0.750367 | 0.812108  | -0.423854 |
| C  | -0.087791 | 0.050430  | -0.489296 | C  | 0.414130  | 0.092762  | -0.545512 |
| O  | -0.252396 | -1.166582 | -0.497244 | O  | 0.442206  | -1.132149 | -0.491680 |
| C  | -1.259981 | 0.972024  | -0.423503 | C  | 1.671046  | 0.876898  | -0.722646 |
| C  | -1.153508 | 2.329676  | -0.756843 | C  | 1.655722  | 2.183381  | -1.230370 |
| C  | -2.247685 | 3.178496  | -0.659706 | C  | 2.834368  | 2.899913  | -1.392020 |
| C  | -3.469195 | 2.669113  | -0.218223 | C  | 4.048169  | 2.305238  | -1.045582 |
| C  | -3.589337 | 1.320344  | 0.092421  | C  | 4.073244  | 1.003067  | -0.561215 |
| C  | -2.506382 | 0.446999  | -0.018619 | C  | 2.900283  | 0.264740  | -0.397681 |
| Se | -2.693608 | -1.463776 | 0.370698  | Se | 2.945809  | -1.589893 | 0.233396  |
| S  | -4.807663 | -1.545406 | 1.151528  | S  | 5.067605  | -1.747908 | 0.965712  |
| C  | -5.779105 | -1.859961 | -0.375559 | C  | 4.954798  | -1.082809 | 2.673001  |
| O  | -2.062677 | 4.488860  | -1.011197 | O  | 2.736501  | 4.167645  | -1.898392 |
| H  | 1.756718  | -1.428176 | -2.107709 | Cl | -4.201109 | -2.794026 | -1.723121 |
| H  | 3.933020  | -2.599386 | -2.291463 | H  | -1.751708 | -1.382084 | -1.586413 |
| H  | 6.607015  | 1.187992  | 2.324750  | H  | -5.778805 | 2.554940  | 2.689790  |
| H  | 4.465999  | 2.401870  | 2.768380  | H  | -3.477544 | 3.534511  | 2.741964  |
| H  | 2.453281  | 1.833811  | 1.451381  | H  | -1.688726 | 2.497407  | 1.394225  |
| H  | 6.6777310 | -1.569574 | -0.276639 | H  | -6.434447 | -0.537774 | 0.638003  |
| H  | 1.208616  | 1.622705  | -0.401269 | H  | -0.663433 | 1.814099  | -0.376041 |
| H  | -0.231449 | 2.753828  | -1.139113 | H  | 0.736691  | 2.656246  | -1.559350 |
| H  | -4.334654 | 3.320778  | -0.123382 | H  | 4.981387  | 2.849760  | -1.169088 |
| H  | -4.543065 | 0.942677  | 0.441316  | H  | 5.025826  | 0.549727  | -0.312651 |
| H  | -6.813450 | -2.009500 | -0.058251 | H  | 5.940519  | -1.217924 | 3.123512  |
| H  | -5.427069 | -2.758960 | -0.879381 | H  | 4.216133  | -1.633020 | 3.254041  |
| H  | -5.733913 | -1.012312 | -1.059313 | H  | 4.707748  | -0.021234 | 2.666735  |
| H  | -2.891224 | 4.977489  | -0.939261 | H  | 3.613071  | 4.551242  | -2.021029 |

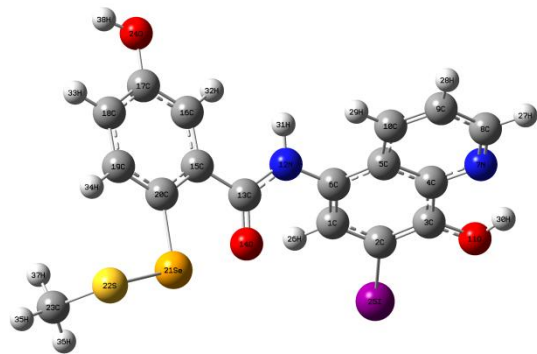

| <b>Selenenyl sulfides for 13k</b> |           |           |           |
|-----------------------------------|-----------|-----------|-----------|
| Electronic Energy = -3802.2265049 |           |           |           |
| C                                 | -1.955010 | -0.187471 | 0.533886  |
| C                                 | -3.307601 | -0.450012 | 0.234005  |
| C                                 | -4.079798 | 0.484628  | -0.421016 |
| C                                 | -3.476224 | 1.718087  | -0.817333 |
| C                                 | -2.100686 | 1.974096  | -0.551723 |
| C                                 | -1.351514 | 0.994281  | 0.161605  |
| N                                 | -4.286511 | 2.592236  | -1.467018 |
| C                                 | -3.772976 | 3.729927  | -1.885763 |
| C                                 | -2.415717 | 4.074332  | -1.702855 |
| C                                 | -1.586084 | 3.199003  | -1.041343 |
| O                                 | -5.377181 | 0.281542  | -0.706226 |
| N                                 | 0.001521  | 1.264145  | 0.498100  |
| C                                 | 1.057126  | 0.410734  | 0.287966  |
| O                                 | 0.919156  | -0.676339 | -0.263522 |
| C                                 | 2.403558  | 0.872709  | 0.734517  |
| C                                 | 2.555478  | 1.908743  | 1.666813  |
| C                                 | 3.815846  | 2.346276  | 2.050663  |
| C                                 | 4.945179  | 1.745823  | 1.493143  |
| C                                 | 4.803577  | 0.703823  | 0.585199  |
| C                                 | 3.545579  | 0.235818  | 0.202468  |
| Se                                | 3.349555  | -1.266595 | -1.039257 |
| S                                 | 5.490213  | -1.609092 | -1.653874 |
| C                                 | 6.058728  | -2.847340 | -0.421831 |
| O                                 | 3.879090  | 3.357392  | 2.971353  |
| I                                 | -4.165358 | -2.293101 | 0.828000  |
| H                                 | -1.377342 | -0.932641 | 1.063289  |
| H                                 | -4.447752 | 4.409036  | -2.400257 |
| H                                 | -2.040789 | 5.014085  | -2.092157 |
| H                                 | -0.535256 | 3.438167  | -0.917790 |
| H                                 | -5.688078 | 1.079861  | -1.173082 |
| H                                 | 0.209239  | 2.183286  | 0.853972  |
| H                                 | 1.701795  | 2.371709  | 2.149424  |
| H                                 | 5.940827  | 2.083088  | 1.771662  |
| H                                 | 5.691225  | 0.255155  | 0.155321  |
| H                                 | 7.069707  | -3.135294 | -0.718230 |
| H                                 | 5.418409  | -3.728042 | -0.435613 |
| H                                 | 6.086550  | -2.426951 | 0.583366  |
| H                                 | 4.796790  | 3.556426  | 3.192016  |

## 2. Chemistry-Synthesis

The NMR spectra were recorded using TMS ( $^1\text{H}$ ,  $^{13}\text{C}$  NMR) as the internal standard and  $\text{Me}_2\text{Se}$  ( $^{77}\text{Se}$  NMR) as external standards on a Bruker AvanceIII spectrometer at 400.13 ( $^1\text{H}$  NMR), 100.61 ( $^{13}\text{C}$  NMR) and 76.31 ( $^{77}\text{Se}$  NMR) MHz. MS spectra were generated on an Agilent LC-MS 6120 instrument with an ESI and APCI mass selective detector. The high-resolution mass spectra were obtained using a Shimadzu LCMS-IT-TOF or LTQ Orbitrap XL (Thermo Scientific) mass spectrometer. The melting points were determined using an SRS-Opti Melt automated melting point instrument. The reactions were followed by thin-layer chromatography (TLC) on glass-packed precoated silica gel plates and visualized in an iodine chamber or with a UV lamp. Flash column chromatography was performed using silica gel (200–300 mesh) purchased from Qingdao Haiyang Chemical Co. Ltd. The purity ( $\geq 95\%$ ) of the samples was determined by HPLC, conducted on a Shimadzu LC-20AT series system, TC-C18 column (4.6 $\times$ 250 mm, 5  $\mu\text{m}$ ), eluted with  $\text{CH}_3\text{OH}/\text{PBS}$  (25 mM  $\text{NaH}_2\text{PO}_4$  pH 3.0), 30/70, at a flow rate of 0.5 mL/min.

### 5-Nitroquinolin-8-ol (2)

Compound **2** were synthesised according to the literature.<sup>3, 4</sup>  $^1\text{H}$  NMR (400 MHz, DMSO)  $\delta$  9.14 (d,  $J = 8.8$  Hz, 1H), 9.02 (d,  $J = 3.5$  Hz, 1H), 8.54 (d,  $J = 8.7$  Hz, 1H), 7.88 (dd,  $J = 8.7, 3.9$  Hz, 1H), 7.21 (d,  $J = 8.8$  Hz, 1H).

### *Tert*-butyl (5-nitroquinolin-8-yl) carbonate (3a)

Compound **3a** was synthesised by following a previously reported procedure.<sup>5</sup> 94% yield. <sup>1</sup>H NMR (400 MHz, CDCl<sub>3</sub>) δ 9.06 (d, *J* = 8.9 Hz, 1H), 9.03 (s, 1H), 8.44 (d, *J* = 8.4 Hz, 1H), 7.68 (dd, *J* = 5.5, 3.3 Hz, 1H), 7.62 (d, *J* = 8.4 Hz, 1H), 1.60 (s, 9H).

#### **General Procedures for the Synthesis of 3b-3c**

DMAP (2.10 g, 17.20 mmol) and DIPEA (12 mL, 68.90 mmol) were added at room temperature to a stirred suspension of nitroxoline (10.0 g, 34.45 mmol) and di-*tert*-butyl dicarbonate (15.03 g, 68.90 mmol) in a 1:2 mixture of hexanes-DCM (500 mL). The mixture was stirred for 72 h at 50 °C, filtered, and concentrated under reduced pressure to provide a crude product which was purified by flash column chromatography on silica gel (eluent: petroleum ether /DCM = 8:2).

#### ***Tert*-butyl (7-chloro-5-nitroquinolin-8-yl) carbonate (3b)**

Yellow solid, 62% yield. *R*<sub>f</sub> = 0.58 (petroleum/EtOAc=10/1). <sup>1</sup>H NMR (400 MHz, CDCl<sub>3</sub>) δ 9.05 (d, *J* = 8.8 Hz, 2H), 8.50 (s, 1H), 7.62 (dd, *J* = 8.7, 4.1 Hz, 1H), 1.59 (s, 9H).

#### ***Tert*-butyl (7-iodo-5-nitroquinolin-8-yl) carbonate (3c)**

Yellow solid, 76% Yield. *R*<sub>f</sub> = 0.67 (petroleum/EtOAc=10/1). <sup>1</sup>H NMR (400 MHz, CDCl<sub>3</sub>) δ 9.04 (dd, *J* = 8.7, 1.3 Hz, 1H), 8.98 (d, *J* = 2.5 Hz, 1H), 8.82 (s, 1H), 7.64 (dd, *J* = 8.8, 4.1 Hz, 1H), 1.66 (s, 9H).

#### **5-Aminoquinolin-8-yl *tert*-butyl carbonate (4a)<sup>5</sup>**

*Tert*-butyl(5-nitroquinolin-8-yl) carbonate (**3a**) (14.0 g, 66.8 mmol) was dissolved in 200 mL of ethyl acetate, 8.0 equiv of SnCl<sub>2</sub> · 2H<sub>2</sub>O (120 g, 535.1 mmol) was added to the solution in one portion, and the reaction was stirred at room temperature for 3 h.

The solution was adjusted to pH=8 with a saturated NaHCO<sub>3</sub> solution, extracted (ethyl acetate), washed (brine), and dried over anhydrous Na<sub>2</sub>SO<sub>4</sub>. Evaporation of the solvent afforded the pure product as a yellow solid in 78% yield. Mp 172.4-173.3 °C. R<sub>f</sub> = 0.32 (CH<sub>2</sub>Cl<sub>2</sub>/CH<sub>3</sub>OH=20/1). <sup>1</sup>H NMR (400 MHz, CDCl<sub>3</sub>) δ 8.90 (s, 1H), 8.20 – 8.05 (m, 1H), 7.38 – 7.29 (m, 2H), 6.72 (dd, *J* = 7.9, 3.4 Hz, 1H), 4.12 (s, 2H), 1.59 (s, 9H). LC/MS (ESI): 261.1 [M+H]<sup>+</sup>.

#### General Procedures for the Synthesis of 4b-4c

To a solution of *tert*-butyl (7-chloro-5-nitroquinolin-8-yl) carbonate (**3b**) or *tert*-butyl(7-iodo-5-nitroquinolin-8-yl) carbonate (**3c**) (1.0 equiv) in 20 mL of ethanol was added 5.0 equiv of Na<sub>2</sub>S 9H<sub>2</sub>O in one portion. The mixture was stirred at room temperature for 3 h.

#### 5-Amino-7-chloroquinolin-8-yl *tert*-butyl carbonate (4b)

Yellow solid, 86% Yield. R<sub>f</sub> = 0.54 (petroleum/EtOAc=5/1). <sup>1</sup>H NMR (400 MHz, CDCl<sub>3</sub>) δ 8.89 (dd, *J* = 4.1, 1.4 Hz, 1H), 8.08 (dd, *J* = 8.5, 1.5 Hz, 1H), 7.30 (dd, *J* = 8.5, 4.1 Hz, 2H), 6.81 (s, 1H), 1.50 (s, 9H). LC/MS (ESI): 251.1 [M–CO<sub>2</sub>+H]<sup>+</sup>.

#### 5-Amino-7-iodoquinolin-8-yl *tert*-butyl carbonate (4c)

Yellow solid, 84% Yield. Mp 123.8-124.9 °C. R<sub>f</sub> = 0.67 (petroleum/EtOAc=5/1). <sup>1</sup>H NMR (400 MHz, CDCl<sub>3</sub>) δ 8.86 (dd, *J* = 4.0, 1.5 Hz, 1H), 8.08 (dd, *J* = 8.5, 1.5 Hz, 1H), 7.34 (dd, *J* = 8.5, 4.1 Hz, 1H), 7.23 (s, 1H), 3.96 (s, 2H), 1.57 (s, 9H). LC/MS (ESI): 343.0 [M–CO<sub>2</sub>+H]<sup>+</sup>.

#### General Procedures for the Synthesis of 6a-6l and 7a-7l

Compound **6a-6l** and **7a-7l** were synthesized according to literature procedures.<sup>6</sup>

### General Procedures for the Synthesis of 8a-8k, 9k and 10k

To a solution of 20 mL of anhydrous DCM, 10.0 equiv of anhydrous triethylamine and 1.0 equiv of (4), a solution of 1.5 equiv of the corresponding chloride in 2 mL of anhydrous DCM was added dropwise. The reaction was stirred at room temperature for 16 h. Saturated NaHCO<sub>3</sub> was added to the mixture, which was then extracted with DCM, washed with brine, dried over anhydrous Na<sub>2</sub>SO<sub>4</sub>, and concentrated under reduced pressure. The residue was purified by silica-column chromatography.

#### ***Tert*-butyl (5-(3-oxobenzo[*d*][1,2]selenazol-2(3*H*)-yl)quinolin-8-yl) carbonate (8a)**

White solid, 81% yield. R<sub>f</sub> = 0.51 (CH<sub>2</sub>Cl<sub>2</sub>/CH<sub>3</sub>OH=20/1). <sup>1</sup>H NMR (400 MHz, CDCl<sub>3</sub>) δ 9.03 – 8.82 (m, 1H), 8.16 (d, *J* = 7.8 Hz, 1H), 8.08 (dd, *J* = 8.6, 1.3 Hz, 1H), 7.73 – 7.56 (m, 4H), 7.51 (t, *J* = 7.4 Hz, 1H), 7.42 (dd, *J* = 8.6, 4.1 Hz, 1H), 1.62 (s, 9H). LC/MS (ESI):443.0 [M+H]<sup>+</sup>.

#### ***Tert*-butyl (5-(6-chloro-3-oxobenzo[*d*][1,2]selenazol-2(3*H*)-yl)quinolin-8-yl) carbonate (8b)**

Pale yellow solid, 78% yield. R<sub>f</sub> = 0.57 (CH<sub>2</sub>Cl<sub>2</sub>/CH<sub>3</sub>OH=20/1). <sup>1</sup>H NMR (400 MHz, CDCl<sub>3</sub>) δ 8.92 (dd, *J* = 4.1, 1.3 Hz, 1H), 8.02 (dd, *J* = 12.8, 4.8 Hz, 2H), 7.73 (d, *J* = 1.6 Hz, 1H), 7.57 (q, *J* = 8.1 Hz, 2H), 7.46 (dd, *J* = 8.3, 1.5 Hz, 1H), 7.40 (dd, *J* = 8.6, 4.2 Hz, 1H), 1.61 (s, 9H). LC/MS (ESI): 477.0 [M+H]<sup>+</sup>.

#### ***Tert*-butyl (5-(5-chloro-3-oxobenzo[*d*][1,2]selenazol-2(3*H*)-yl)quinolin-8-yl) carbonate (8c)**

Pale yellow solid, 84% yield. R<sub>f</sub> = 0.58 (CH<sub>2</sub>Cl<sub>2</sub>/CH<sub>3</sub>OH=20/1). <sup>1</sup>H NMR (400 MHz, CDCl<sub>3</sub>) δ 9.02 – 8.91 (m, 1H), 8.15 (s, 1H), 8.06 (d, *J* = 8.5 Hz, 1H), 7.71 – 7.62 (m,

3H), 7.59 (d,  $J = 8.1$  Hz, 1H), 7.47 (dd,  $J = 8.6, 4.2$  Hz, 1H), 1.62 (s, 9H). LC/MS (ESI): 477.0 [M+H]<sup>+</sup>.

***Tert*-butyl (5-(6-fluoro-3-oxobenzo[*d*][1,2]selenazol-2(3*H*)-yl)quinolin-8-yl) carbonate (8d)**

White solid, 89% yield.  $R_f = 0.53$  (CH<sub>2</sub>Cl<sub>2</sub>/CH<sub>3</sub>OH=20/1). <sup>1</sup>H NMR (400 MHz, CDCl<sub>3</sub>)  $\delta$  8.97 (dd,  $J = 4.2, 1.6$  Hz, 1H), 8.14 (dd,  $J = 8.6, 5.2$  Hz, 1H), 8.08 (dd,  $J = 8.6, 1.6$  Hz, 1H), 7.64 (d,  $J = 8.1$  Hz, 1H), 7.60 (s, 1H), 7.46 (dd,  $J = 8.6, 4.2$  Hz, 1H), 7.42 (dd,  $J = 7.8, 2.2$  Hz, 1H), 7.23 (dd,  $J = 8.6, 2.2$  Hz, 1H), 1.62 (s, 9H). . LC/MS (ESI): 461.0 [M+H]<sup>+</sup>.

***Tert*-butyl (5-(5-fluoro-3-oxobenzo[*d*][1,2]selenazol-2(3*H*)-yl)quinolin-8-yl) carbonate (8e)**

White solid, 80% yield.  $R_f = 0.56$  (CH<sub>2</sub>Cl<sub>2</sub>/CH<sub>3</sub>OH=20/1). <sup>1</sup>H NMR (400 MHz, CDCl<sub>3</sub>)  $\delta$  8.94 (t,  $J = 3.6$  Hz, 1H), 8.11 (dt,  $J = 8.8, 4.9$  Hz, 1H), 8.05 (dd,  $J = 8.5, 3.2$  Hz, 1H), 7.59 (ddd,  $J = 17.3, 8.0, 4.8$  Hz, 2H), 7.43 (dd,  $J = 8.3, 4.6$  Hz, 2H), 7.25 – 7.17 (m, 1H), 1.62 (s, 9H). LC/MS (ESI): 461.0 [M+H]<sup>+</sup>.

***Tert*-butyl (5-(4-fluoro-3-oxobenzo[*d*][1,2]selenazol-2(3*H*)-yl)quinolin-8-yl) carbonate (8f)**

Pale yellow solid, 71% yield.  $R_f = 0.51$  (CH<sub>2</sub>Cl<sub>2</sub>/CH<sub>3</sub>OH=20/1). <sup>1</sup>H NMR (400 MHz, CDCl<sub>3</sub>)  $\delta$  8.97 (dd,  $J = 4.2, 1.6$  Hz, 1H), 8.13 (dd,  $J = 8.6, 1.6$  Hz, 1H), 7.68 – 7.64 (m, 1H), 7.63 (d,  $J = 2.9$  Hz, 1H), 7.59 (d,  $J = 8.1$  Hz, 1H), 7.49 (d,  $J = 3.0$  Hz, 1H), 7.48 – 7.45 (m, 1H), 7.17 (dd,  $J = 9.6, 8.4$  Hz, 1H), 1.62 (s, 9H). LC/MS (ESI): 461.0 [M+H]<sup>+</sup>.

***Tert*-butyl**

**(5-(3-oxo-6-(trifluoromethyl)benzo[*d*][1,2]selenazol-2(3*H*)-yl)quinolin-8-yl)**

**carbonate (8g)**

yellow solid, 82% yield.  $R_f = 0.59$  ( $\text{CH}_2\text{Cl}_2/\text{CH}_3\text{OH}=20/1$ ).  $^1\text{H}$  NMR (400 MHz,  $\text{CDCl}_3$ )  $\delta$  8.97 (dd,  $J = 4.2, 1.6$  Hz, 1H), 8.28 (d,  $J = 8.2$  Hz, 1H), 8.07 – 8.01 (m, 2H), 7.77 (dd,  $J = 8.2, 0.8$  Hz, 1H), 7.62 (dd,  $J = 20.8, 8.1$  Hz, 2H), 7.46 (dd,  $J = 8.6, 4.2$  Hz, 1H), 1.62 (s, 9H). LC/MS (ESI): 510.0  $[\text{M}+\text{H}]^+$ .

***Tert*-butyl (5-(5-methoxy-3-oxobenzo[*d*][1,2]selenazol-2(3*H*)-yl)quinolin-8-yl)**

**carbonate (8i)**

Pale yellow solid, 77% yield.  $R_f = 0.54$  ( $\text{CH}_2\text{Cl}_2/\text{CH}_3\text{OH}=20/1$ ).  $^1\text{H}$  NMR (400 MHz,  $\text{CDCl}_3$ )  $\delta$  8.96 (dd,  $J = 4.1, 1.5$  Hz, 1H), 8.09 (dd,  $J = 8.6, 1.6$  Hz, 1H), 7.65 (dd,  $J = 5.3, 2.7$  Hz, 2H), 7.58 (dd,  $J = 8.4, 4.2$  Hz, 2H), 7.45 (dd,  $J = 8.6, 4.2$  Hz, 1H), 7.34 (dd,  $J = 8.7, 2.7$  Hz, 1H), 3.92 (s, 3H), 1.62 (s, 9H). LC/MS (ESI): 473.0  $[\text{M}+\text{H}]^+$ .

***Tert*-butyl (5-(5,6-dimethoxy-3-oxobenzo[*d*][1,2]selenazol-2(3*H*)-yl)quinolin-8-yl)**

**carbonate (8j)**

White solid, 69% yield.  $R_f = 0.55$  ( $\text{CH}_2\text{Cl}_2/\text{CH}_3\text{OH}=20/1$ ).  $^1\text{H}$  NMR (400 MHz,  $\text{CDCl}_3$ )  $\delta$  8.97 (d,  $J = 4.1$  Hz, 1H), 8.10 (d,  $J = 8.6$  Hz, 1H), 7.65 (d,  $J = 8.0$  Hz, 1H), 7.58 (t,  $J = 3.9$  Hz, 2H), 7.46 (dd,  $J = 8.2, 4.1$  Hz, 1H), 7.13 (s, 1H), 4.02 (s, 3H), 4.00 (s, 3H), 1.62 (s, 9H). LC/MS (ESI): 503.1  $[\text{M}+\text{H}]^+$ .

**2-(8-((*Tert*-butoxycarbonyl)oxy)quinolin-5-yl)-3-oxo-2,3-dihydrobenzo[*d*][1,2]selenazol-5-yl acetate (8k)**



Pale yellow solid, 76% yield.  $R_f = 0.49$  ( $\text{CH}_2\text{Cl}_2/\text{CH}_3\text{OH}=20/1$ ).  $^1\text{H NMR}$  (400 MHz,  $\text{CDCl}_3$ )  $\delta$  8.97 (dd,  $J = 4.2, 1.6$  Hz, 1H), 8.09 (dd,  $J = 8.6, 1.6$  Hz, 1H), 7.90 (d,  $J = 2.3$  Hz, 1H), 7.72 (d,  $J = 8.5$  Hz, 1H), 7.65 (d,  $J = 8.1$  Hz, 1H), 7.59 (d,  $J = 8.1$  Hz, 1H), 7.52 – 7.45 (m, 2H), 2.37 (s, 3H), 1.62 (s, 9H). LC/MS (ESI): 501.1  $[\text{M}+\text{H}]^+$ .

***Tert*-butyl (5-(5-hydroxy-3-oxobenzo[*d*][1,2]selenazol-2(3*H*)-yl)quinolin-8-yl) carbonate (8l)**

The solution of 1.0 equiv of **8k**, 1.0 equiv of anhydrous potassium carbonate in 20mL of methyl alcohol was stirred at room temperature and monitored by TLC. After the completion of the reaction, the mixture was adjusted to pH=7 with acetic acid, 150mL of water was added, filtrated, and the product was recrystallized from ethyl acetate to afford a white solid, 78% yield.  $R_f = 0.38$  ( $\text{CH}_2\text{Cl}_2/\text{CH}_3\text{OH}=20/1$ ).  $^1\text{H NMR}$  (400 MHz,  $\text{CDCl}_3$ )  $\delta$  8.92 (dd,  $J = 4.1, 1.5$  Hz, 1H), 8.07 (dd,  $J = 8.6, 1.5$  Hz, 1H), 7.67 (d,  $J = 2.4$  Hz, 1H), 7.65 (d,  $J = 8.1$  Hz, 1H), 7.58 (d,  $J = 8.1$  Hz, 1H), 7.45 (d,  $J = 8.2$  Hz, 1H), 7.43 – 7.40 (m, 1H), 7.14 (dd,  $J = 8.6, 2.4$  Hz, 1H), 1.60 (s, 9H). LC/MS (ESI): 459.0  $[\text{M}+\text{H}]^+$ .

**2-(8-((*Tert*-butoxycarbonyl)oxy)-7-chloroquinolin-5-yl)-3-oxo-2,3-dihydrobenzo[*d*][1,2]selenazol-5-yl acetate (9k)**

White solid, 71% yield.  $R_f = 0.34$  (petroleum/EtOAc=5/1).  $^1\text{H NMR}$  (400 MHz,  $\text{CDCl}_3$ )  $\delta$  8.95 (dd,  $J = 4.0, 1.6$  Hz, 1H), 8.00 (dd,  $J = 8.5, 1.6$  Hz, 1H), 7.89 (d,  $J = 2.2$  Hz, 1H), 7.72 (d,  $J = 8.6$  Hz, 1H), 7.67 (s, 1H), 7.49 (dd,  $J = 8.6, 2.4$  Hz, 1H), 7.40 (dd,  $J = 8.5, 4.1$  Hz, 1H), 2.37 (s, 3H), 1.59 (s, 9H). LC/MS (ESI): 491.0  $[\text{M}-\text{CO}_2+\text{H}]^+$ .

### ***Tert*-butyl**

#### **(7-chloro-5-(5-hydroxy-3-oxobenzo[*d*][1,2]selenazol-2(3*H*)-yl)quinolin-8-yl)**

#### **carbonate (9l)**

To a solution 1.0 equiv of **9k** in 20 mL of methyl alcohol containing, 1.0 equiv of anhydrous potassium carbonate was added in portion. The reaction was stirred at room temperature and monitored by TLC. After the completion of the reaction, the mixture was adjusted to pH 7 with acetic acid. Water (150 mL) was added, extracted by ethyl acetate, washed with brine, dried over anhydrous Na<sub>2</sub>SO<sub>4</sub>, evaporated the solvent under reduced pressure, purified by silica-column chromatography to afford a white solid, 82% yield. R<sub>f</sub> = 0.34 (petroleum/EtOAc=2/1). <sup>1</sup>H NMR (400 MHz, CDCl<sub>3</sub>) δ 8.93 (dd, *J* = 4.1, 1.6 Hz, 1H), 7.99 (dd, *J* = 8.5, 1.6 Hz, 1H), 7.68 (s, 1H), 7.67 (d, *J* = 2.5 Hz, 1H), 7.46 (d, *J* = 8.6 Hz, 1H), 7.37 (dd, *J* = 8.5, 4.1 Hz, 1H), 7.16 (dd, *J* = 8.6, 2.5 Hz, 1H), 1.58 (s, 9H). LC/MS (ESI): 449.0 [M–CO<sub>2</sub>+H]<sup>+</sup>.

#### **2-(8-((*Tert*-butoxycarbonyl)oxy)-7-iodoquinolin-5-yl)-3-oxo-2,3-dihydrobenzo[*d*][1,2]selenazol-5-yl acetate (10k)**

Pale yellow solid, 84% yield. R<sub>f</sub> = 0.39 (petroleum/EtOAc=5/1). <sup>1</sup>H NMR (400 MHz, CDCl<sub>3</sub>) δ 8.91 (d, *J* = 2.1 Hz, 1H), 8.02 (s, 1H), 7.99 (dd, *J* = 8.4, 1.3 Hz, 1H), 7.88 (d, *J* = 1.8 Hz, 1H), 7.72 (d, *J* = 8.4 Hz, 1H), 7.49 (dd, *J* = 8.2, 1.5 Hz, 1H), 7.42 (dd, *J* = 8.4, 3.7 Hz, 1H), 2.37 (s, 3H), 1.66 (s, 9H). LC/MS (ESI): 583.0 [M–CO<sub>2</sub>+H]<sup>+</sup>.

### ***Tert*-butyl**

#### **(5-(5-hydroxy-3-oxobenzo[*d*][1,2]selenazol-2(3*H*)-yl)-7-iodoquinolin-8-yl)**

#### **carbonate (10l)**

The procedure are same as **9l**. Pale yellow solid, 76% yield.  $R_f = 0.35$  (petroleum/EtOAc=2/1).  $^1\text{H NMR}$  (400 MHz,  $\text{CDCl}_3$ )  $\delta$  8.89 (dd,  $J = 4.0, 1.6$  Hz, 1H), 8.01 (s, 1H), 7.97 (dd,  $J = 8.5, 1.6$  Hz, 1H), 7.67 (d,  $J = 2.5$  Hz, 1H), 7.48 (d,  $J = 8.6$  Hz, 1H), 7.39 (dd,  $J = 8.5, 4.1$  Hz, 1H), 7.19 (dd,  $J = 8.6, 2.6$  Hz, 1H), 1.64 (s, 9H). LC/MS (ESI): 541.0  $[\text{M}-\text{CO}_2+\text{H}]^+$ .

#### **General Procedure for the Synthesis of 11a-11c, 11e, 11i and 11j**

Piperidine (1.5 equiv) was added to a solution of 5 mL anhydrous DCM containing 1.0 equiv of **8a**, **8b**, **8c**, **8e**, **8i** or **8j** at ambient temperature. After 20 minutes, the mixture was filtered, washed with DCM, and dried under reduced pressure to obtain the pure product.

#### **General Procedures for the Synthesis of 11d, 11f, 11g, 11k, 12k and 13k**

To a solution of 300 mg of **8**, **9** or **10** in 12 mL  $\text{CH}_2\text{Cl}_2$ , HCl gas was bubbled at room temperature for 4 h. The reaction was stirred under an HCl atmosphere overnight at 0 °C. The mixture was filtered and dried under reduced pressure to yield the product.

#### **2-(8-Hydroxyquinolin-5-yl)benzo[*d*][1,2]selenazol-3(2*H*)-one (11a)**

Yellow solid, 86% yield. Mp 247.4-248.1 °C.  $R_f = 0.19$  ( $\text{CH}_2\text{Cl}_2/\text{CH}_3\text{OH}=5/1$ ).  $^1\text{H NMR}$  (400 MHz,  $d_6$ -DMSO)  $\delta$  8.91 (d,  $J = 3.9$  Hz, 1H), 8.13 (d,  $J = 8.1$  Hz, 1H), 7.94 (s, 1H), 7.93 – 7.90 (m, 1H), 7.73 (t,  $J = 7.6$  Hz, 1H), 7.59 (dd,  $J = 8.4, 4.1$  Hz, 1H), 7.53 (t,  $J = 8.1$  Hz, 2H), 7.15 (d,  $J = 8.1$  Hz, 1H).  $^{13}\text{C NMR}$  (101 MHz,  $d_6$ -DMSO)  $\delta$

166.40, 153.51, 148.58, 140.42, 138.48, 132.13, 128.37, 127.99, 127.04, 126.19, 125.94, 125.24, 122.34, 110.61.  $^{77}\text{Se}$  NMR ( $d_6$ -DMSO):  $\delta = 886$  ppm. HRMS (ESI)  $m/z$   $[\text{M}+\text{Cl}]^-$  for  $\text{C}_{16}\text{H}_{10}\text{N}_2\text{O}_2\text{Se}$  pred. 376.9602, meas. 376.9586; HPLC purity: 99.45%.

**6-Chloro-2-(8-hydroxyquinolin-5-yl)benzo[*d*][1,2]selenazol-3(2*H*)-one (11b)**

Yellow solid, 88% yield. Mp 244.6-245.1 °C.  $R_f = 0.22$  ( $\text{CH}_2\text{Cl}_2/\text{CH}_3\text{OH}=5/1$ ).  $^1\text{H}$  NMR (400 MHz,  $d_6$ -DMSO)  $\delta$  8.88 (s, 1H), 8.15 (s, 1H), 7.90 (t,  $J = 7.3$  Hz, 2H), 7.55 (d,  $J = 7.2$  Hz, 2H), 7.49 (d,  $J = 8.0$  Hz, 1H), 7.13 (d,  $J = 7.9$  Hz, 1H).  $^{13}\text{C}$  NMR (101 MHz,  $d_6$ -DMSO)  $\delta$  165.48, 153.65, 148.58, 142.06, 138.47, 137.13, 132.11, 129.46, 128.44, 126.62, 126.17, 126.11, 125.32, 124.86, 122.39, 110.61.  $^{77}\text{Se}$  NMR ( $d_6$ -DMSO):  $\delta = 864$  ppm. HRMS (ESI)  $m/z$   $[\text{M}+\text{Cl}]^-$  for  $\text{C}_{16}\text{H}_9\text{N}_2\text{O}_2\text{ClSe}$  pred. 410.9210, meas. 410.9205; HPLC purity: 98.80%.

**5-Chloro-2-(8-hydroxyquinolin-5-yl)benzo[*d*][1,2]selenazol-3(2*H*)-one (11c)**

Yellow solid, 81% yield. Mp 248.3-249.4 °C.  $R_f = 0.21$  ( $\text{CH}_2\text{Cl}_2/\text{CH}_3\text{OH}=5/1$ ).  $^1\text{H}$  NMR (400 MHz,  $d_6$ -DMSO)  $\delta$  8.91 (dd,  $J = 3.9, 1.3$  Hz, 1H), 8.15 (dd,  $J = 8.5, 3.2$  Hz, 1H), 7.94 (dd,  $J = 6.4, 2.1$  Hz, 1H), 7.89 (d,  $J = 2.2$  Hz, 1H), 7.83 – 7.75 (m, 1H), 7.59 (dd,  $J = 8.5, 4.1$  Hz, 1H), 7.52 (dd,  $J = 7.4, 2.8$  Hz, 1H), 7.16 (dd,  $J = 8.1, 3.6$  Hz, 1H).  $^{13}\text{C}$  NMR (101 MHz,  $d_6$ -DMSO)  $\delta$  165.15, 153.68, 148.57, 139.10, 138.48, 132.12, 131.93, 131.34, 128.89, 128.34, 127.92, 127.12, 126.08, 124.91, 122.37, 110.59.  $^{77}\text{Se}$  NMR ( $d_6$ -DMSO):  $\delta = 870$  ppm. HRMS (ESI)  $m/z$   $[\text{M}+\text{Cl}]^-$  for  $\text{C}_{16}\text{H}_9\text{N}_2\text{O}_2\text{ClSe}$  pred. 410.9210, meas. 410.9188; HPLC purity: 99.35%.

**5-Fluoro-2-(8-hydroxyquinolin-5-yl)benzo[*d*][1,2]selenazol-3(2*H*)-one (11e)**

Yellow solid, 75% yield. Mp 249.1-250.3 °C.  $R_f = 0.20$  ( $\text{CH}_2\text{Cl}_2/\text{CH}_3\text{OH}=5/1$ ).  $^1\text{H}$  NMR (400 MHz,  $d_6$ -DMSO)  $\delta$  8.91 – 8.86 (m, 1H), 8.04 – 7.81 (m, 3H), 7.57 (dd,  $J = 8.4, 3.9$  Hz, 1H), 7.50 (d,  $J = 8.1$  Hz, 1H), 7.36 (t,  $J = 8.7$  Hz, 1H), 7.13 (d,  $J = 8.1$  Hz, 1H).  $^{13}\text{C}$  NMR (101 MHz,  $d_6$ -DMSO)  $\delta$  165.56 (d,  $J_{\text{C-F}} = 17.9$  Hz), 163.15 (s), 153.60 (s), 148.56 (s), 142.52 (d,  $J_{\text{C-F}} = 11.0$  Hz), 138.47 (s), 132.11 (s), 130.17 (d,  $J_{\text{C-F}} = 9.3$  Hz), 128.46 (s), 126.22 (s), 125.01 (s), 123.87 (s), 122.37 (s), 114.45 (d,  $J_{\text{C-F}} = 23.6$  Hz), 112.46 (d,  $J_{\text{C-F}} = 26.1$  Hz), 110.59 (s).  $^{77}\text{Se}$  NMR ( $d_6$ -DMSO):  $\delta = 933$  ppm. HRMS (ESI)  $m/z$   $[\text{M}+\text{Cl}]^-$  for  $\text{C}_{16}\text{H}_9\text{N}_2\text{O}_2\text{FSe}$  pred. 394.9508, meas. 394.9464; HPLC purity: 95.14%.

**6-Fluoro-2-(8-hydroxyquinolin-5-yl)benzo[*d*][1,2]selenazol-3(2*H*)-one**

**hydrochloride (11d)**

Yellow solid, 92% yield. Mp 237.4-238.6 °C.  $R_f = 0.25$  ( $\text{CH}_2\text{Cl}_2/\text{CH}_3\text{OH}=5/1$ ).  $^1\text{H}$  NMR (400 MHz,  $d_6$ -DMSO)  $\delta$  9.17 (dd,  $J = 5.2, 1.0$  Hz, 1H), 8.77 (dd,  $J = 8.6, 0.9$  Hz, 1H), 8.51 (dd,  $J = 10.0, 2.4$  Hz, 1H), 8.08 (dd,  $J = 8.6, 5.3$  Hz, 1H), 7.93 (dd,  $J = 8.5, 5.6$  Hz, 1H), 7.77 (d,  $J = 8.3$  Hz, 1H), 7.64 (d,  $J = 8.3$  Hz, 1H), 7.33 (td,  $J = 8.6, 2.4$  Hz, 1H).  $^{13}\text{C}$  NMR (101 MHz,  $d_6$ -DMSO)  $\delta$  165.38 (d,  $J = 28.3$  Hz), 162.77 (s), 147.38 (s), 144.46 (s), 144.33 (d,  $J = 10.5$  Hz), 143.24 (s), 130.29 (s), 129.58 (d,  $J = 9.6$  Hz), 128.80 (s), 127.66 (s), 127.06 (s), 125.34 (s), 122.49 (s), 115.73 (s), 113.96 (d,  $J = 12.6$  Hz), 113.70 (d,  $J = 9.0$  Hz).  $^{77}\text{Se}$  NMR ( $d_6$ -DMSO):  $\delta = 860$  ppm. HRMS (ESI)  $m/z$   $[\text{M}+\text{H}]^+$  for  $\text{C}_{16}\text{H}_9\text{N}_2\text{O}_2\text{FSe}$  pred. 360.9887, meas. 360.9871; HPLC purity: 98.23%.

**4-Fluoro-2-(8-hydroxyquinolin-5-yl)benzo[*d*][1,2]selenazol-3(2*H*)-one**

**hydrochloride (11f)**

Yellow solid, 92% yield. Mp 274.1-275.0 °C.  $R_f = 0.18$  (CH<sub>2</sub>Cl<sub>2</sub>/CH<sub>3</sub>OH=5/1). <sup>1</sup>H NMR (400 MHz, *d*<sub>6</sub>-DMSO) δ 9.13 (dd, *J* = 5.2, 1.2 Hz, 1H), 8.75 (dd, *J* = 8.6, 1.0 Hz, 1H), 8.41 (d, *J* = 8.1 Hz, 1H), 8.04 (dd, *J* = 8.6, 5.2 Hz, 1H), 7.76 (d, *J* = 8.3 Hz, 1H), 7.63 (td, *J* = 8.1, 5.0 Hz, 1H), 7.56 (d, *J* = 8.3 Hz, 1H), 7.24 (dd, *J* = 10.6, 8.2 Hz, 1H). <sup>13</sup>C NMR (101 MHz, *d*<sub>6</sub>-DMSO) δ 163.72 (d, *J*<sub>C-F</sub> = 3.1 Hz), 161.84 (d, *J*<sub>C-F</sub> = 259.8 Hz), 147.58 (s), 144.53 (s), 144.21 (s), 143.13 (s), 131.88 (d, *J*<sub>C-F</sub> = 8.3 Hz), 130.58 (s), 128.94 (s), 127.21 (d, *J*<sub>C-F</sub> = 8.7 Hz), 123.41 (d, *J*<sub>C-F</sub> = 3.3 Hz), 122.58 (s), 116.13 (d, *J*<sub>C-F</sub> = 10.8 Hz), 115.59 (s), 112.47 (d, *J*<sub>C-F</sub> = 19.8 Hz). <sup>77</sup>Se NMR (*d*<sub>6</sub>-DMSO): δ = 879 ppm. HRMS (ESI) *m/z* [M+H]<sup>+</sup> for C<sub>16</sub>H<sub>9</sub>FN<sub>2</sub>O<sub>2</sub>Se pred. 360.9886, meas. 360.9886; HPLC purity: 98.21%.

**2-(8-Hydroxyquinolin-5-yl)-6-(trifluoromethyl)benzo[*d*][1,2]selenazol-3(2*H*)-one**

**(11g)**

Yellow solid, 96% yield. Mp 251.1-252.0 °C.  $R_f = 0.23$  (CH<sub>2</sub>Cl<sub>2</sub>/CH<sub>3</sub>OH=5/1). <sup>1</sup>H NMR (400 MHz, *d*<sub>6</sub>-DMSO) δ 9.16 (dd, *J* = 5.3, 1.3 Hz, 1H), 9.13 (s, 1H), 8.78 (dd, *J* = 8.6, 1.3 Hz, 1H), 8.12 – 8.08 (m, 1H), 8.08 – 8.05 (m, 1H), 7.81 (dd, *J* = 8.2, 1.4 Hz, 1H), 7.79 (d, *J* = 8.3 Hz, 1H), 7.62 (d, *J* = 8.3 Hz, 1H). <sup>13</sup>C NMR (101 MHz, *d*<sub>6</sub>-DMSO) δ 165.27 (s), 147.48 (s), 144.49 (s), 143.28 (s), 142.93 (s), 132.26 (s), 131.08 (q, *J* = 31.5 Hz), 130.21 (s), 128.81 (s), 128.36 (s), 127.47 (s), 126.93 (s), 124.74 (d, *J* = 4.0 Hz), 124.12 (q, *J* = 273.0 Hz), 122.54 (s), 122.24 (d, *J* = 3.0 Hz),

115.71 (s).  $^{77}\text{Se}$  NMR ( $d_6$ -DMSO):  $\delta = 855$  ppm. HRMS (ESI)  $m/z$   $[\text{M}+\text{H}]^+$  for  $\text{C}_{17}\text{H}_9\text{N}_2\text{O}_3\text{F}_3\text{Se}$  pred. 410.9855, meas. 410.9836; HPLC purity: 99.73%.

**2-(8-Hydroxyquinolin-5-yl)-6-methoxybenzo[*d*][1,2]selenazol-3(2*H*)-one hydrobromide (11h)**

To a solution of 20mL hydrobromic acid (47%) 100mg of **10h** was added. After refluxed for 24h, the mixture was filtrated and dried under reduced pressure to get the product as a brown solid. 62% yield. Mp 316.3-317.2 °C.  $R_f = 0.16$  ( $\text{CH}_2\text{Cl}_2/\text{CH}_3\text{OH}=5/1$ ).  $^1\text{H}$  NMR (400 MHz,  $d_6$ -DMSO)  $\delta$  9.13 (dd,  $J = 5.2, 1.3$  Hz, 1H), 8.68 (dd,  $J = 8.6, 1.1$  Hz, 1H), 8.08 (d,  $J = 2.3$  Hz, 1H), 8.05 (dd,  $J = 8.7, 5.2$  Hz, 1H), 7.79 (dd,  $J = 15.1, 8.4$  Hz, 2H), 7.51 (d,  $J = 8.3$  Hz, 1H), 7.08 (dd,  $J = 8.6, 2.4$  Hz, 1H), 3.88 (s, 3H).  $^{13}\text{C}$  NMR (101 MHz,  $d_6$ -DMSO)  $\delta$  166.05, 162.18, 147.44, 144.65, 142.92, 142.64, 130.58, 129.05, 128.78, 127.70, 127.24, 122.63, 120.86, 115.46, 113.95, 111.24, 55.61.  $^{77}\text{Se}$  NMR ( $d_6$ -DMSO):  $\delta = 899$  ppm. HRMS (ESI)  $m/z$   $[\text{M}+\text{H}]^+$  for  $\text{C}_{17}\text{H}_{12}\text{N}_2\text{O}_3\text{Se}$  pred. 373.0086, meas. 373.0086; HPLC purity: 98.76%.

**2-(8-Hydroxyquinolin-5-yl)-5-methoxybenzo[*d*][1,2]selenazol-3(2*H*)-one (11i)**

Yellow solid, 72%yield. Mp 225.5-226.2 °C.  $R_f = 0.18$  ( $\text{CH}_2\text{Cl}_2/\text{CH}_3\text{OH}=5/1$ ).  $^1\text{H}$  NMR (400 MHz,  $d_6$ -DMSO)  $\delta$  8.90 (d,  $J = 3.6$  Hz, 1H), 8.00 (d,  $J = 8.8$  Hz, 1H), 7.91 (d,  $J = 8.3$  Hz, 1H), 7.58 (dd,  $J = 8.5, 4.0$  Hz, 1H), 7.50 (d,  $J = 8.1$  Hz, 1H), 7.43 (d,  $J = 2.5$  Hz, 1H), 7.37 (dd,  $J = 8.7, 2.5$  Hz, 1H), 7.15 (d,  $J = 8.2$  Hz, 1H), 3.87 (s, 3H).  $^{13}\text{C}$  NMR (101 MHz,  $d_6$ -DMSO)  $\delta$  166.17, 158.48, 153.66, 148.50, 138.55, 132.13, 131.26, 128.23, 128.06, 126.91, 126.13, 125.35, 122.27, 121.14, 110.59, 110.29,

55.50.  $^{77}\text{Se}$  NMR ( $d_6$ -DMSO):  $\delta = 941$  ppm. HRMS (ESI)  $m/z$   $[\text{M}+\text{Cl}]^-$  for  $\text{C}_{17}\text{H}_{12}\text{N}_2\text{O}_3\text{Se}$  pred. 406.9708, meas. 406.9701; HPLC purity: 99.40%.

**2-(8-Hydroxyquinolin-5-yl)-5,6-dimethoxybenzo[*d*][1,2]selenazol-3(2*H*)-one (11j)**

Yellow solid, 83% yield. Mp 276.5-277.1 °C.  $R_f = 0.18$  ( $\text{CH}_2\text{Cl}_2/\text{CH}_3\text{OH}=5/1$ ).  $^1\text{H}$  NMR (400 MHz,  $d_6$ -DMSO)  $\delta$  8.90 (d,  $J = 3.8$  Hz, 1H), 7.88 (d,  $J = 8.4$  Hz, 1H), 7.64 (s, 1H), 7.59 (dd,  $J = 8.4, 4.0$  Hz, 1H), 7.49 (d,  $J = 8.1$  Hz, 1H), 7.36 (s, 1H), 7.14 (d,  $J = 8.1$  Hz, 1H), 3.89 (s, 3H), 3.86 (s, 3H).  $^{13}\text{C}$  NMR (101 MHz,  $d_6$ -DMSO)  $\delta$  166.39, 153.42, 152.93, 148.53, 138.48, 132.94, 132.14, 128.37, 126.28, 125.54, 122.28, 119.05, 110.55, 109.05, 107.49, 55.80, 55.65.  $^{77}\text{Se}$  NMR ( $d_6$ -DMSO):  $\delta = 938$  ppm. HRMS (ESI)  $m/z$   $[\text{M}+\text{Cl}]^-$  for  $\text{C}_{18}\text{H}_{14}\text{N}_2\text{O}_4\text{Se}$  pred. 436.9814, meas. 436.9778; HPLC purity: 98.16%.

**5-Hydroxy-2-(8-hydroxyquinolin-5-yl)benzo[*d*][1,2]selenazol-3(2*H*)-one hydrochloride (11k)**

Yellow solid, 83% yield. Mp 294.4-294.9 °C.  $R_f = 0.24$  ( $\text{CH}_2\text{Cl}_2/\text{CH}_3\text{OH}=3/1$ ).  $^1\text{H}$  NMR (400 MHz,  $d_6$ -DMSO)  $\delta$  9.12 (dd,  $J = 5.1, 1.2$  Hz, 1H), 8.65 (dd,  $J = 8.6, 0.9$  Hz, 1H), 8.20 (d,  $J = 8.7$  Hz, 1H), 8.02 (dd,  $J = 8.6, 5.2$  Hz, 1H), 7.74 (d,  $J = 8.3$  Hz, 1H), 7.54 (d,  $J = 8.3$  Hz, 1H), 7.31 (d,  $J = 2.6$  Hz, 1H), 7.17 (dd,  $J = 8.7, 2.7$  Hz, 1H).  $^{13}\text{C}$  NMR (101 MHz,  $d_6$ -DMSO)  $\delta$  166.31, 156.22, 147.41, 144.48, 143.14, 130.27, 130.26, 128.88, 128.79, 128.01, 127.81, 127.00, 122.50, 120.53, 115.63, 112.79.  $^{77}\text{Se}$  NMR ( $d_6$ -DMSO):  $\delta = 899$  ppm. HRMS (ESI)  $m/z$   $[\text{M}+\text{H}]^+$  for  $\text{C}_{16}\text{H}_{10}\text{N}_2\text{O}_3\text{Se}$  pred. 358.9929, meas. 358.9928; HPLC purity: 98.73%.



**2-(7-Chloro-8-hydroxyquinolin-5-yl)-5-hydroxybenzo[*d*][1,2]selenazol-3(2*H*)-one hydrochloride (12k)**

Yellow solid, 95% yield. Mp 262.3-263.6 °C.  $R_f = 0.28$  (CH<sub>2</sub>Cl<sub>2</sub>/CH<sub>3</sub>OH=5/1). <sup>1</sup>H NMR (400 MHz, *d*<sub>6</sub>-DMSO) δ 9.05 (dd, *J* = 4.5, 1.3 Hz, 1H), 8.28 (d, *J* = 8.4 Hz, 1H), 8.23 (d, *J* = 8.7 Hz, 1H), 7.80 (dd, *J* = 8.5, 4.6 Hz, 1H), 7.71 (s, 1H), 7.32 (d, *J* = 2.4 Hz, 1H), 7.17 (dd, *J* = 8.6, 2.5 Hz, 1H). <sup>13</sup>C NMR (101 MHz, *d*<sub>6</sub>-DMSO) δ 166.38, 156.22, 146.86, 145.31, 139.79, 133.19, 130.34, 129.58, 128.88, 128.78, 128.04, 125.76, 122.48, 120.57, 119.61, 112.82. <sup>77</sup>Se NMR (*d*<sub>6</sub>-DMSO): δ = 903 ppm. HRMS (ESI) *m/z* [M+H]<sup>+</sup> for C<sub>16</sub>H<sub>9</sub>ClN<sub>2</sub>O<sub>3</sub>Se pred. 392.9540, meas. 392.9543; HPLC purity: 98.89%.

**5-Hydroxy-2-(8-hydroxy-7-iodoquinolin-5-yl)benzo[*d*][1,2]selenazol-3(2*H*)-one hydrochloride (13k)**

Yellow solid, 92% yield. Mp 229.4-230.1 °C.  $R_f = 0.27$  (CH<sub>2</sub>Cl<sub>2</sub>/CH<sub>3</sub>OH=5/1). <sup>1</sup>H NMR (400 MHz, *d*<sub>6</sub>-DMSO) δ 8.95 (d, *J* = 4.2 Hz, 1H), 8.11 (d, *J* = 8.7 Hz, 1H), 8.05 (d, *J* = 8.4 Hz, 1H), 7.84 (s, 1H), 7.69 (dd, *J* = 8.5, 4.3 Hz, 1H), 7.31 (d, *J* = 2.5 Hz, 1H), 7.18 (dd, *J* = 8.7, 2.6 Hz, 1H). <sup>13</sup>C NMR (101 MHz, *d*<sub>6</sub>-DMSO) δ 166.29, 156.22, 151.17, 147.59, 137.07, 136.65, 134.01, 130.10, 128.73, 128.61, 127.85, 126.28, 122.56, 120.62, 112.79, 83.06. <sup>77</sup>Se NMR (*d*<sub>6</sub>-DMSO): δ = 925 ppm. HRMS (ESI) *m/z* [M+H]<sup>+</sup> for C<sub>16</sub>H<sub>9</sub>IN<sub>2</sub>O<sub>3</sub>Se pred. 484.8896, meas. 484.8897; HPLC purity: 99.31%.

### 3. Coupled Reductase Assay

**Procedure:** Phosphate buffer solutions of pH 7.5, GSH, NADPH, GR were added into cuvette contained buffer solution. Finally, peroxide was added to initiate the reaction in a cuvette having mixture of all and immediately start the experiment for the control values in absence of any catalyst. For the test samples, solution was made in appropriate solvent and added into cuvette containing the mixture of buffer solution, GSH, NADPH and GR. Now, peroxide was added to initiate the reaction. Each of the measurement was carried out in triplicates. The initial reduction rate (5-10% consumption of NADPH) was expressed as  $\mu\text{M}$  of NADPH depleting per minute ( $\mu\text{M}/\text{min}$ ) after the addition of peroxide. A plot of inverse of initial reaction rate  $v_0$  inverse of GSH and peroxide concentration gave the catalytic parameters such as maximum velocities ( $V_{\text{max}}$ ), Michaelis constants ( $K_m$ ), catalytic constants ( $k_{\text{cat}}$ ) and catalytic efficiencies ( $\eta$ ) for the reduction of peroxide by GSH in presence of compound.

Initial reaction rate ( $v_0$ ) =  $\Delta A/6.22 \times 1000$  ( $\mu\text{M} \cdot \text{min}^{-1}$ )

$$\frac{1}{v_0} = \frac{K_m}{V_{\text{max}}} \cdot \frac{1}{[S]} + \frac{1}{V_{\text{max}}}$$

$$k_{\text{cat}} = \frac{V_{\text{max}}}{[S]_0}$$

$$\eta = \frac{k_{\text{cat}}}{K_m}$$

$$\text{Slope} = \frac{K_m}{V_{\text{max}}}$$

$$\text{Intercept} = \frac{1}{V_{\text{max}}}$$

Where,  $\Delta A$  = Difference in absorbance for one minute obtained from the initial 5-10%

of the NADPH consumption measured at 340 nm. It is obtained from the graph of absorbance in the first 10 s.

$v_0$  = Initial reaction rate

$\eta$  = Catalytic efficiency

$k_{\text{cat}}$  = Catalytic constant

$K_m$  = Michaelis constant

$[S]_0$  = The concentration of catalyst

| material | Sample ( $\mu\text{L}$ ) | Control ( $\mu\text{L}$ ) |
|----------|--------------------------|---------------------------|
| PBS      | 140                      | 150                       |
| GSH      | 20                       | 20                        |
| NADPH    | 5                        | 5                         |
| GR       | 5                        | 5                         |
| Catalyst | 10                       | 0                         |
| Peroxide | 20                       | 20                        |

Total volume of the solution was taken 200  $\mu\text{L}$ . GSH (2 mM), NADPH (0.4 mM), GR (1.3 unit/mL), catalyst (80  $\mu\text{M}$ ) and peroxide (1.6 mM).

## Effect of increasing GSH on initial rate for the reduction of H<sub>2</sub>O<sub>2</sub>

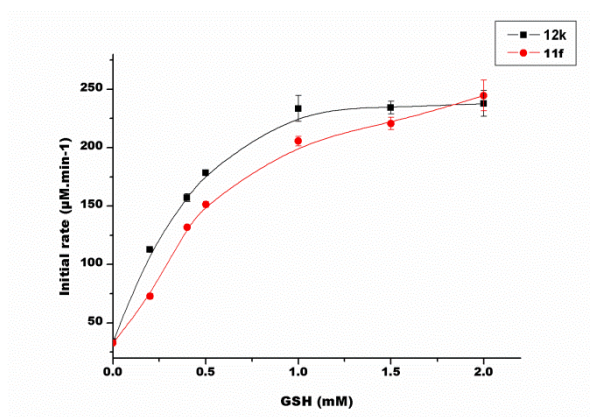

**Figure S1.** Effect of increasing GSH on initial rate for the reduction of H<sub>2</sub>O<sub>2</sub> (1.6 mM) in the presence of **11f** and **12k** (80  $\mu\text{M}$ ).

## 4. Determination of the Catalytic Parameters

**Table S1.** Summary for the effect of substrate ( $\text{H}_2\text{O}_2$ ) concentration on the initial rate of 12k

| $[\text{H}_2\text{O}_2]$<br>(mM) | $v_0(\mu\text{M}\cdot\text{min}^{-1})$ | Mean<br>$v_0(\mu\text{M}\cdot\text{min}^{-1})$ | $1/[\text{H}_2\text{O}_2]$<br>( $\text{mM}^{-1}$ ) | $1/v_0$<br>( $\mu\text{M}^{-1}\cdot\text{min}$ ) |
|----------------------------------|----------------------------------------|------------------------------------------------|----------------------------------------------------|--------------------------------------------------|
| 1.6                              | 198.88<br>211.34<br>192.66             | $200.96 \pm 9.51$                              | 0.6250                                             | 0.0049761                                        |
| 1.4                              | 187.75<br>184.33<br>189.93             | $187.33 \pm 2.82$                              | 0.7142                                             | 0.0053379                                        |
| 1.2                              | 182.40<br>182.14<br>182.66             | $182.40 \pm 0.26$                              | 0.8333                                             | 0.0054824                                        |
| 1.0                              | 169.35<br>172.41<br>176.78             | $172.84 \pm 3.73$                              | 1.0000                                             | 0.0057854                                        |
| 0.8                              | 158.62<br>165.86<br>163.64             | $162.70 \pm 3.70$                              | 1.2500                                             | 0.0061460                                        |
| 0.4                              | 118.95                                 | $115.36 \pm 7.96$                              | 2.5000                                             | 0.0086682                                        |

|  |        |  |  |  |
|--|--------|--|--|--|
|  | 120.90 |  |  |  |
|  | 106.24 |  |  |  |

Assay conditions: phosphate buffer (100 mM), pH 7.5, with EDTA (1 mM), GSH (2 mM),

NADPH (0.4 mM), GR (1.3 unit/mL), H<sub>2</sub>O<sub>2</sub> (variable) and **12k** (80 μM).

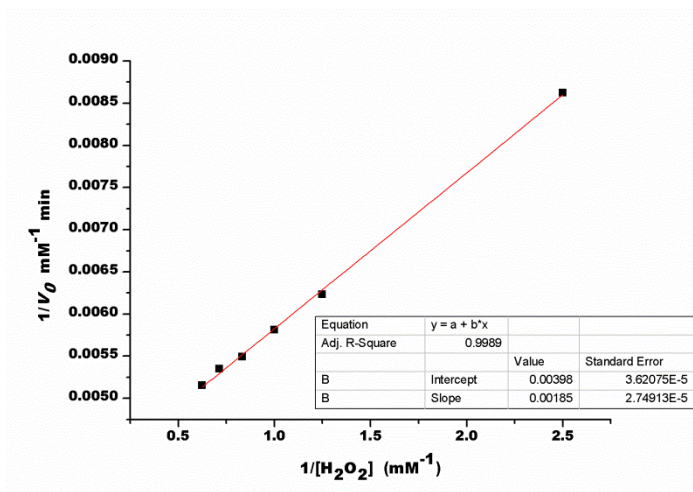

**Figure S2.** The Lineweaver-Burk (double-reciprocal) plots obtained for **12k** with the variation of H<sub>2</sub>O<sub>2</sub> at the fixed concentration of GSH.

$$\text{Intercept} = 0.00398 \pm 0.0000362$$

$$\text{Slop} = 0.00185 \pm 0.0000274$$

$$V_{\text{max}} = 251.25 \pm 1.24$$

$$K_{\text{m}} = 0.46 \pm 0.02$$

$$k_{\text{cat}} = 3.14 \pm 0.01$$

$$\eta = 6.83 \pm 0.04$$

**Table S2.** Summary for the effect of substrate (*t*-BuOOH) concentration on the initial

rate of **12k**

| [ <i>t</i> -BuOOH]<br>(mM) | $v_0(\mu\text{M}\cdot\text{min}^{-1})$ | Mean<br>$v_0(\mu\text{M}\cdot\text{min}^{-1})$ | 1/[ <i>t</i> -BuOOH]<br>(mM <sup>-1</sup> ) | 1/ $v_0$<br>( $\mu\text{M}^{-1}\cdot\text{min}$ ) |
|----------------------------|----------------------------------------|------------------------------------------------|---------------------------------------------|---------------------------------------------------|
| 1.6                        | 70.04<br>67.45<br>72.21                | 69.90 ± 2.38                                   | 0.6250                                      | 0.014306                                          |
| 1.4                        | 69.23<br>60.41<br>68.13                | 65.92 ± 4.80                                   | 0.7142                                      | 0.015169                                          |
| 1.2                        | 69.77<br>61.47<br>65.24                | 65.49 ± 4.15                                   | 0.8333                                      | 0.015268                                          |
| 1.0                        | 60.24<br>61.21<br>59.53                | 60.32 ± 0.84                                   | 1.0000                                      | 0.016576                                          |
| 0.8                        | 54.02<br>52.79<br>55.69                | 54.16 ± 1.45                                   | 1.2500                                      | 0.018461                                          |
| 0.4                        | 37.97<br>30.78<br>35.17                | 34.64 ± 4.06                                   | 2.5000                                      | 0.028868                                          |

Assay conditions: phosphate buffer (100 mM), pH 7.5, with EDTA (1 mM), GSH (2 mM),

NADPH (0.4 mM), GR (1.3 unit/mL), *t*-BuOOH (variable) and **12k** (80  $\mu$ M).

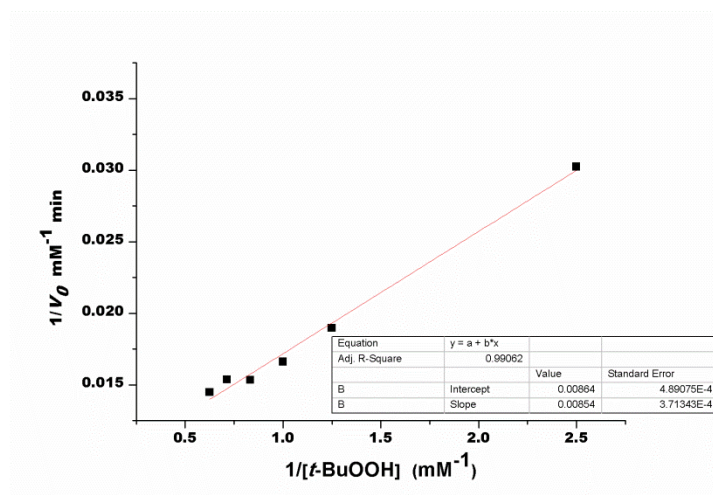

**Figure S3.** The Lineweaver-Burk (double-reciprocal) plots obtained for **12k** with the variation of *t*-BuOOH at the fixed concentration of GSH.

$$\text{Intercept} = 0.00884 \pm 0.000489$$

$$\text{Slop} = 0.00854 \pm 0.000371$$

$$V_{\max} = 113.12 \pm 4.42$$

$$K_m = 0.96 \pm 0.03$$

$$k_{\text{cat}} = 1.41 \pm 0.05$$

$$\eta = 1.46 \pm 0.05$$

**Table S3.** Summary for the effect of substrate (Cum-OOH) concentration on the initial rate of **12k**

| [Cum-OOH]<br>(mM) | $v_0(\mu\text{M} \cdot \text{min}^{-1})$ | Mean<br>$v_0(\mu\text{M} \cdot \text{min}^{-1})$ | $1/[\text{Cum-OOH}]$<br>( $\text{mM}^{-1}$ ) | $1/v_0$<br>( $\mu\text{M}^{-1} \cdot \text{min}$ ) |
|-------------------|------------------------------------------|--------------------------------------------------|----------------------------------------------|----------------------------------------------------|
|                   |                                          |                                                  |                                              |                                                    |



|     |                            |              |        |           |
|-----|----------------------------|--------------|--------|-----------|
| 1.6 | 186.78<br>188.01<br>191.58 | 188.79 ±2.49 | 0.6250 | 0.0052968 |
| 1.4 | 184.73<br>180.91<br>176.32 | 180.65 ±4.21 | 0.7142 | 0.0055354 |
| 1.2 | 173.02<br>178.55<br>168.44 | 173.33 ±5.06 | 0.8333 | 0.0057691 |
| 1.0 | 167.93<br>168.99<br>169.01 | 168.64 ±0.61 | 1.0000 | 0.0059296 |
| 0.8 | 151.62<br>153.45<br>150.87 | 151.98 ±1.32 | 1.2500 | 0.0065798 |
| 0.4 | 103.14<br>98.50<br>100.83  | 100.82 ±2.32 | 2.5000 | 0.0099183 |

Assay conditions: phosphate buffer (100 mM), pH 7.5, with EDTA (1 mM), GSH (2 mM),

NADPH (0.4 mM), GR (1.3 unit/mL), Cum-OOH (variable) and **12k** (80 μM).

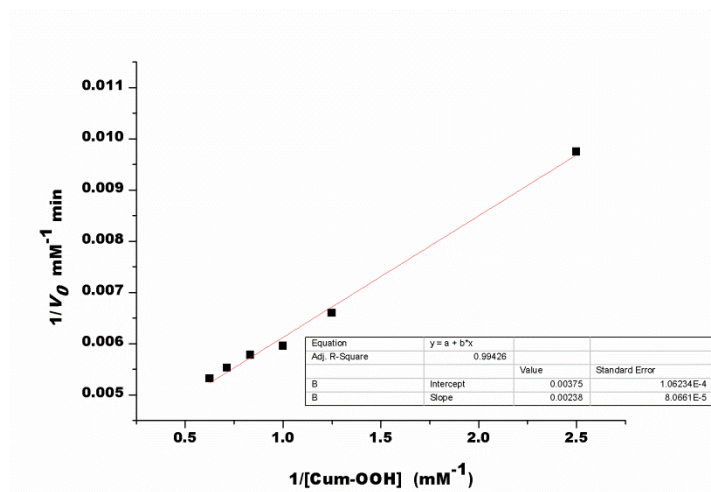

**Figure S4.** The Lineweaver-Burk (double-reciprocal) plots obtained for **12k** with the variation of Cum-OOH at the fixed concentration of GSH.

$$\text{Intercept} = 0.00375 \pm 0.000106$$

$$\text{Slop} = 0.00238 \pm 0.0000806$$

$$V_{\text{max}} = 266.67 \pm 3.51$$

$$K_m = 0.63 \pm 0.08$$

$$k_{\text{cat}} = 3.33 \pm 0.04$$

$$\eta = 5.28 \pm 0.06$$

**Table S4.** Summary for the effect of substrate ( $\text{H}_2\text{O}_2$ ) concentration on the initial rate of **11f**

| $[\text{H}_2\text{O}_2]$<br>(mM) | $v_0(\mu\text{M} \cdot \text{min}^{-1})$ | Mean<br>$v_0(\mu\text{M} \cdot \text{min}^{-1})$ | $1/[\text{H}_2\text{O}_2]$<br>( $\text{mM}^{-1}$ ) | $1/v_0$<br>( $\mu\text{M}^{-1} \cdot \text{min}$ ) |
|----------------------------------|------------------------------------------|--------------------------------------------------|----------------------------------------------------|----------------------------------------------------|
| 1.6                              | 253.08                                   | $251.09 \pm 4.79$                                | 0.6250                                             | 0.0039826                                          |

|     |                            |              |        |           |
|-----|----------------------------|--------------|--------|-----------|
|     | 254.57<br>245.63           |              |        |           |
| 1.4 | 190.38<br>198.10<br>196.32 | 194.93 ±4.02 | 0.7142 | 0.0051300 |
| 1.2 | 169.24<br>168.46<br>169.01 | 168.90 ±0.40 | 0.8333 | 0.0059206 |
| 1.0 | 154.42<br>156.27<br>157.34 | 156.01 ±1.47 | 1.0000 | 0.0064098 |
| 0.8 | 127.85<br>120.66<br>128.65 | 125.72 ±4.40 | 1.2500 | 0.0079541 |
| 0.4 | 81.37<br>81.90<br>85.67    | 82.98 ±2.34  | 2.5000 | 0.0120511 |

Assay conditions: phosphate buffer (100 mM), pH 7.5, with EDTA (1 mM), GSH (2 mM),

NADPH (0.4 mM), GR (1.3 unit/mL), H<sub>2</sub>O<sub>2</sub> (variable) and **11f** (80 μM).

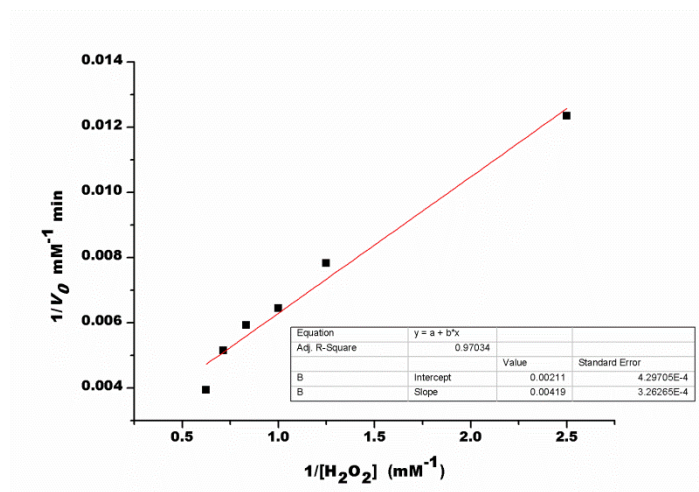

**Figure S5.** The Lineweaver-Burk (double-reciprocal) plots obtained for **11f** with the variation of  $\text{H}_2\text{O}_2$  at the fixed concentration of GSH.

$$\text{Intercept} = 0.00211 \pm 0.000429$$

$$\text{Slop} = 0.00419 \pm 0.000326$$

$$V_{\text{max}} = 473.93 \pm 8.01$$

$$K_{\text{m}} = 1.98 \pm 0.15$$

$$k_{\text{cat}} = 5.92 \pm 0.10$$

$$\eta = 2.99 \pm 0.05$$

**Table S5.** Summary for the effect of substrate (*t*-BuOOH) concentration on the initial rate of **11f**

| [ <i>t</i> -BuOOH]<br>(mM) | $v_0(\mu\text{M} \cdot \text{min}^{-1})$ | Mean<br>$v_0(\mu\text{M} \cdot \text{min}^{-1})$ | $1/[t\text{-BuOOH}]$<br>( $\text{mM}^{-1}$ ) | $1/v_0$<br>( $\mu\text{M}^{-1} \cdot \text{min}$ ) |
|----------------------------|------------------------------------------|--------------------------------------------------|----------------------------------------------|----------------------------------------------------|
| 1.6                        | 58.22                                    | $64.53 \pm 5.69$                                 | 0.6250                                       | 0.0154966                                          |

|     |                         |              |        |            |
|-----|-------------------------|--------------|--------|------------|
|     | 69.27                   |              |        |            |
|     | 66.12                   |              |        |            |
| 1.4 | 56.82<br>55.34<br>53.22 | 55.12 ± 1.81 | 0.7142 | 0.0181422  |
| 1.2 | 56.82<br>44.98<br>45.33 | 49.04 ± 6.73 | 0.8333 | 0.02039151 |
| 1.0 | 30.78<br>47.26<br>38.98 | 39.00 ± 8.24 | 1.0000 | 0.0256410  |
| 0.8 | 27.88<br>33.76<br>32.44 | 31.36 ± 3.08 | 1.2500 | 0.0318877  |
| 0.4 | 13.94<br>12.97<br>13.88 | 13.59 ± 0.54 | 2.5000 | 0.0735835  |

Assay conditions: phosphate buffer (100 mM), pH 7.5, with EDTA (1 mM), GSH (2 mM),

NADPH (0.4 mM), GR (1.3 unit/mL), *t*-BuOOH (variable) and **11f** (80 μM).

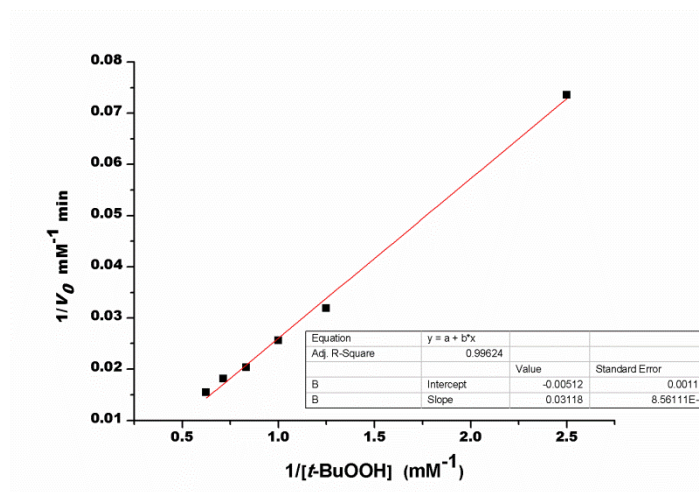

**Figure S6.** The Lineweaver-Burk (double-reciprocal) plots obtained for **11f** with the variation of *t*-BuOOH at the fixed concentration of GSH.

$$\text{Intercept} = -0.00512 \pm 0.00113$$

$$\text{Slop} = 0.03118 \pm 0.000856$$

$$V_{\max} = 195.31 \pm 8.10$$

$$K_m = 6.08 \pm 0.25$$

$$k_{\text{cat}} = 2.44 \pm 0.10$$

$$\eta = 0.40 \pm 0.10$$

**Table S6.** Summary for the effect of substrate (Cum-OOH) concentration on the initial rate of **11f**

| [Cum-OOH]<br>(mM) | $v_0(\mu\text{M} \cdot \text{min}^{-1})$ | Mean<br>$v_0(\mu\text{M} \cdot \text{min}^{-1})$ | $1/[\text{Cum-OOH}]$<br>( $\text{mM}^{-1}$ ) | $1/v_0$<br>( $\mu\text{M}^{-1} \cdot \text{min}$ ) |
|-------------------|------------------------------------------|--------------------------------------------------|----------------------------------------------|----------------------------------------------------|
| 1.6               | 182.49                                   | $180.91 \pm 1.62$                                | 0.6250                                       | 0.0055276                                          |

|     |                            |              |        |           |
|-----|----------------------------|--------------|--------|-----------|
|     | 180.99<br>179.24           |              |        |           |
| 1.4 | 150.04<br>148.99<br>156.44 | 151.82 ±4.03 | 0.7142 | 0.0066370 |
| 1.2 | 133.99<br>126.01<br>135.92 | 131.97 ±5.25 | 0.8333 | 0.0075774 |
| 1.0 | 122.68<br>129.61<br>118.73 | 123.67 ±5.50 | 1.0000 | 0.0080860 |
| 0.8 | 105.84<br>104.35<br>105.14 | 105.11 ±0.74 | 1.2500 | 0.0095138 |
| 0.4 | 55.51<br>57.96<br>59.36    | 57.61 ±1.95  | 2.5000 | 0.0173580 |

Assay conditions: phosphate buffer (100 mM), pH 7.5, with EDTA (1 mM), GSH (2 mM),

NADPH (0.4 mM), GR (1.3 unit/mL), Cum-OOH (variable) and **11f** (80 μM).

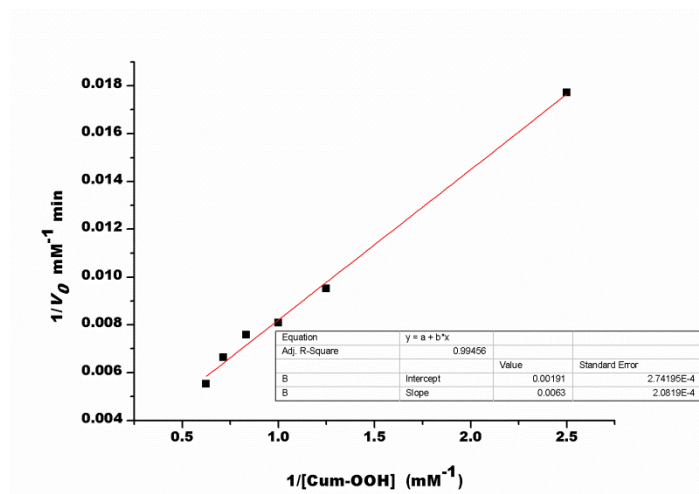

**Figure S7.** The Lineweaver-Burk (double-reciprocal) plots obtained for **11f** with the variation of Cum-OOH at the fixed concentration of GSH.

$$\text{Intercept} = 0.00191 \pm 0.000274$$

$$\text{Slop} = 0.0063 \pm 0.000208$$

$$V_{\text{max}} = 523.56 \pm 10.21$$

$$K_m = 3.30 \pm 0.06$$

$$k_{\text{cat}} = 6.54 \pm 0.12$$

$$\eta = 1.98 \pm 0.03$$

**Table S7.** Summary for the effect of substrate ( $\text{H}_2\text{O}_2$ ) concentration on the initial rate of **ebsele**n

| $[\text{H}_2\text{O}_2]$<br>(mM) | $v_0(\mu\text{M} \cdot \text{min}^{-1})$ | Mean<br>$v_0(\mu\text{M} \cdot \text{min}^{-1})$ | $1/[\text{H}_2\text{O}_2]$<br>( $\text{mM}^{-1}$ ) | $1/v_0$<br>( $\mu\text{M}^{-1} \cdot \text{min}$ ) |
|----------------------------------|------------------------------------------|--------------------------------------------------|----------------------------------------------------|----------------------------------------------------|
| 1.6                              | 128.64                                   | $129.25 \pm 0.66$                                | 0.6250                                             | 0.0077369                                          |



|     |                            |              |        |           |
|-----|----------------------------|--------------|--------|-----------|
|     | 129.17<br>129.96           |              |        |           |
| 1.4 | 128.38<br>124.70<br>132.85 | 128.64 ±4.08 | 0.7142 | 0.0077736 |
| 1.2 | 116.72<br>116.63<br>110.31 | 114.55 ±3.67 | 0.8333 | 0.0087298 |
| 1.0 | 109.70<br>113.03<br>111.42 | 111.38 ±1.66 | 1.0000 | 0.0089782 |
| 0.8 | 111.45<br>99.44<br>104.98  | 105.29 ±6.01 | 1.2500 | 0.0094975 |
| 0.4 | 65.24<br>61.12<br>63.04    | 63.13 ±2.06  | 2.5000 | 0.0158277 |

Assay conditions: phosphate buffer (100 mM), pH 7.5, with EDTA (1 mM), GSH (2 mM),

NADPH (0.4 mM), GR (1.3 unit/mL), H<sub>2</sub>O<sub>2</sub> (variable) and **ebsele**n (80 μM).

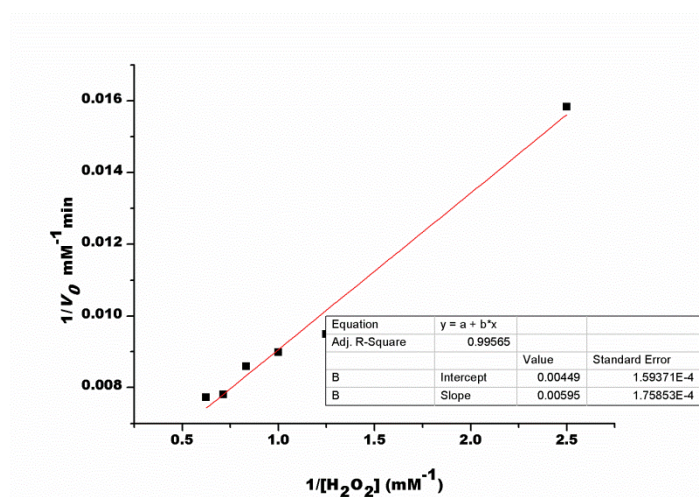

**Figure S8.** The Lineweaver-Burk (double-reciprocal) plots obtained for **ebselen** with the variation of  $\text{H}_2\text{O}_2$  at the fixed concentration of GSH.

$$\text{Intercept} = 0.00449 \pm 0.0001593$$

$$\text{Slop} = 0.00595 \pm 0.000175$$

$$V_{\text{max}} = 222.71 \pm 3.46$$

$$K_{\text{m}} = 1.32 \pm 0.04$$

$$k_{\text{cat}} = 2.78 \pm 0.20$$

$$\eta = 2.10 \pm 0.1$$

**Table S8.** Summary for the effect of substrate (*t*-BuOOH) concentration on the initial rate of **ebselen**

| [ <i>t</i> -BuOOH]<br>(mM) | $v_0(\mu\text{M} \cdot \text{min}^{-1})$ | Mean<br>$v_0(\mu\text{M} \cdot \text{min}^{-1})$ | $1/[t\text{-BuOOH}]$<br>( $\text{mM}^{-1}$ ) | $1/v_0$<br>( $\mu\text{M}^{-1} \cdot \text{min}$ ) |
|----------------------------|------------------------------------------|--------------------------------------------------|----------------------------------------------|----------------------------------------------------|
| 1.6                        | 52.04                                    | $51.75 \pm 2.30$                                 | 0.6250                                       | 0.0193236                                          |

|     |                         |              |        |            |
|-----|-------------------------|--------------|--------|------------|
|     | 49.32<br>53.89          |              |        |            |
| 1.4 | 49.02<br>39.81<br>37.70 | 42.17 ± 6.01 | 0.7142 | 0.0237090  |
| 1.2 | 32.35<br>33.14<br>34.63 | 33.37 ± 1.15 | 0.8333 | 0.0299640  |
| 1.0 | 27.44<br>30.69<br>25.99 | 28.04 ± 2.40 | 1.0000 | 0.0356633  |
| 0.8 | 17.62<br>14.90<br>20.08 | 17.53 ± 2.59 | 1.2500 | 0.05703422 |
| 0.4 | 6.84<br>9.03<br>8.93    | 8.26 ± 1.23  | 2.5000 | 0.12096774 |

Assay conditions: phosphate buffer (100 mM), pH 7.5, with EDTA (1 mM), GSH (2 mM),

NADPH (0.4 mM), GR (1.3 unit/mL), *t*-BuOOH (variable) and **eb**selen (80 μM).

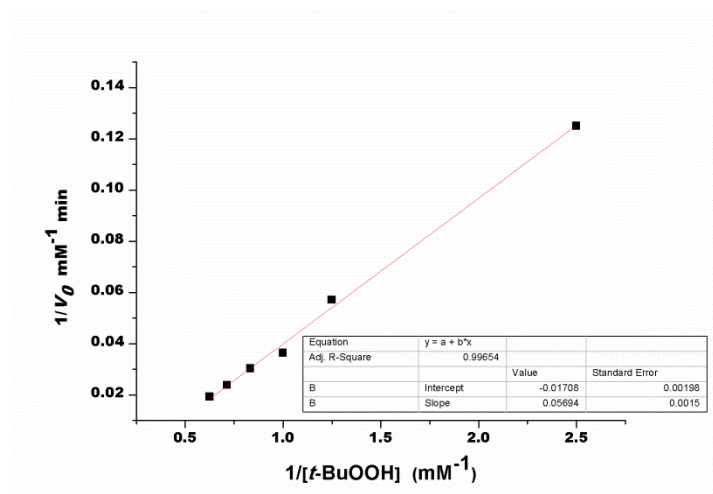

**Figure S9.** The Lineweaver-Burk (double-reciprocal) plots obtained for **ebselen** with the variation of *t*-BuOOH at the fixed concentration of GSH.

$$\text{Intercept} = -0.01708 \pm 0.00198$$

$$\text{Slop} = 0.05694 \pm 0.0015$$

$$V_{\max} = 58.55 \pm 3.00$$

$$K_m = 3.33 \pm 0.17$$

$$k_{\text{cat}} = 0.73 \pm 0.03$$

$$\eta = 0.22 \pm 0.01$$

**Table S9.** Summary for the effect of substrate (Cum-OOH) concentration on the initial rate of **ebselen**

| [Cum-OOH]<br>(mM) | $v_0(\mu\text{M} \cdot \text{min}^{-1})$ | Mean<br>$v_0(\mu\text{M} \cdot \text{min}^{-1})$ | $1/[\text{Cum-OOH}]$<br>( $\text{mM}^{-1}$ ) | $1/v_0$<br>( $\mu\text{M}^{-1} \cdot \text{min}$ ) |
|-------------------|------------------------------------------|--------------------------------------------------|----------------------------------------------|----------------------------------------------------|
| 1.6               | 87.60                                    | $86.41 \pm 1.33$                                 | 0.6250                                       | 0.0115727                                          |

|     |                         |             |        |           |
|-----|-------------------------|-------------|--------|-----------|
|     | 84.97<br>86.66          |             |        |           |
| 1.4 | 73.66<br>83.04<br>84.35 | 80.35 ±5.83 | 0.7142 | 0.0124455 |
| 1.2 | 77.69<br>77.97<br>79.62 | 78.42 ±1.04 | 0.8333 | 0.0127507 |
| 1.0 | 62.96<br>65.06<br>61.12 | 63.04 ±1.97 | 1.0000 | 0.0158612 |
| 0.8 | 59.45<br>56.12<br>56.29 | 57.28 ±1.87 | 1.2500 | 0.0174560 |
| 0.4 | 39.63<br>38.32<br>34.98 | 37.64 ±2.39 | 2.5000 | 0.0265651 |

Assay conditions: phosphate buffer (100 mM), pH 7.5, with EDTA (1 mM), GSH (2 mM),

NADPH (0.4 mM), GR (1.3 unit/mL), Cum-OOH (variable) and **eb**selen (80 μM).

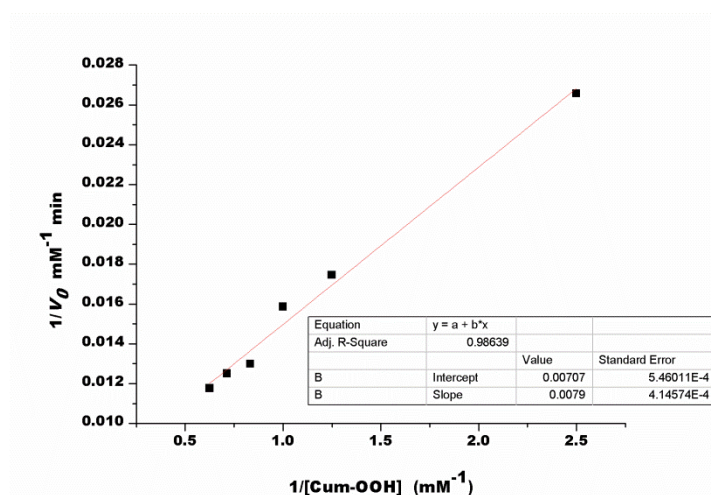

**Figure S10.** The Lineweaver-Burk (double-reciprocal) plots obtained for **ebselen** with the variation of Cum-OOH at the fixed concentration of GSH.

$$\text{Intercept} = 0.00707 \pm 0.000546$$

$$\text{Slop} = 0.0079 \pm 0.000414$$

$$V_{\text{max}} = 141.44 \pm 8.10$$

$$K_{\text{m}} = 1.11 \pm 0.06$$

$$k_{\text{cat}} = 1.77 \pm 0.10$$

$$\eta = 1.59 \pm 0.09$$

**Table S10.** Summary for the effect of substrate (GSH) concentration on the initial rate of **11f•HCl**.

| [GSH]<br>(mM) | $v_0(\mu\text{M} \cdot \text{min}^{-1})$ | Mean<br>$v_0(\mu\text{M} \cdot \text{min}^{-1})$ | 1/[GSH]<br>(mM <sup>-1</sup> ) | 1/ $v_0$<br>( $\mu\text{M}^{-1} \cdot \text{min}$ ) |
|---------------|------------------------------------------|--------------------------------------------------|--------------------------------|-----------------------------------------------------|
| 0.2           | 70.68                                    | 72.98 ± 2.28                                     | 5.0000                         | 0.0137023                                           |

|     |                            |               |        |            |
|-----|----------------------------|---------------|--------|------------|
|     | 75.24                      |               |        |            |
|     | 73.02                      |               |        |            |
| 0.4 | 130.57<br>132.06<br>133.05 | 131.89 ±1.24  | 2.5000 | 0.0075818  |
| 0.5 | 150.65<br>154.32<br>149.54 | 151.50 ±2.50  | 2.0000 | 0.00660151 |
| 1   | 213.97<br>209.32<br>217.65 | 213.64 ±4.17  | 1.0000 | 0.00468062 |
| 1.5 | 215.98<br>210.22<br>220.89 | 215.69 ±5.34  | 0.6667 | 0.00463614 |
| 2   | 240.28<br>233.96<br>259.23 | 244.49 ±13.15 | 0.5000 | 0.00409014 |

Assay conditions: phosphate buffer (100 mM), pH 7.5, with EDTA (1 mM), GSH (variable),

NADPH (0.4 mM), GR (1.3 unit/mL), H<sub>2</sub>O<sub>2</sub> (1.6 mM) and **11f•HCl** (80 μM).

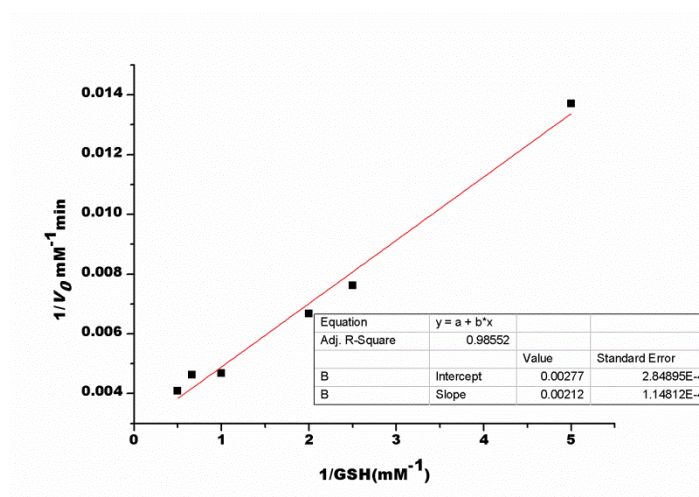

**Figure S11.** The Lineweaver-Burk (double-reciprocal) plots obtained for **11f•HCl** with the variation of GSH at the fixed concentration of H<sub>2</sub>O<sub>2</sub>.

$$\text{Intercept} = 0.00277 \pm 0.00028$$

$$\text{Slop} = 0.00212 \pm 0.00011$$

$$V_{\text{max}} = 361.01 \pm 7.21$$

$$K_m = 0.76 \pm 0.01$$

$$k_{\text{cat}} = 4.51 \pm 0.09$$

$$\eta = 5.90 \pm 0.12$$

**Table S11.** Summary for the effect of substrate (GSH) concentration on the initial rate of **11f•HCl**.

| [GSH]<br>(mM) | $v_0(\mu\text{M} \cdot \text{min}^{-1})$ | Mean<br>$v_0(\mu\text{M} \cdot \text{min}^{-1})$ | 1/[GSH]<br>(mM <sup>-1</sup> ) | 1/ $v_0$<br>( $\mu\text{M}^{-1} \cdot \text{min}$ ) |
|---------------|------------------------------------------|--------------------------------------------------|--------------------------------|-----------------------------------------------------|
|               |                                          |                                                  |                                |                                                     |



|     |       |             |        |            |
|-----|-------|-------------|--------|------------|
| 0.2 | 10.12 | 10.45 ±1.74 | 5.0000 | 0.09569378 |
|     | 12.34 |             |        |            |
|     | 8.89  |             |        |            |
| 0.4 | 15.87 | 15.90 ±1.72 | 2.5000 | 0.06286672 |
|     | 17.65 |             |        |            |
|     | 14.20 |             |        |            |
| 0.5 | 19.11 | 19.33 ±2.13 | 2.0000 | 0.05172413 |
|     | 21.57 |             |        |            |
|     | 17.32 |             |        |            |
| 1   | 23.32 | 23.53 ±4.06 | 1.0000 | 0.04250495 |
|     | 24.81 |             |        |            |
|     | 22.45 |             |        |            |
| 1.5 | 30.78 | 32.47 ±5.97 | 0.6667 | 0.03079449 |
|     | 39.11 |             |        |            |
|     | 27.53 |             |        |            |
| 2   | 37.18 | 34.19 ±3.12 | 0.5000 | 0.02924261 |
|     | 30.95 |             |        |            |
|     | 34.46 |             |        |            |

Assay conditions: phosphate buffer (100 mM), pH 7.5, with EDTA (1 mM), GSH (variable), NADPH (0.4 mM), GR (1.3 unit/mL), *t*-BuOOH (1.6 mM) and **11f•HCl** (80 μM).

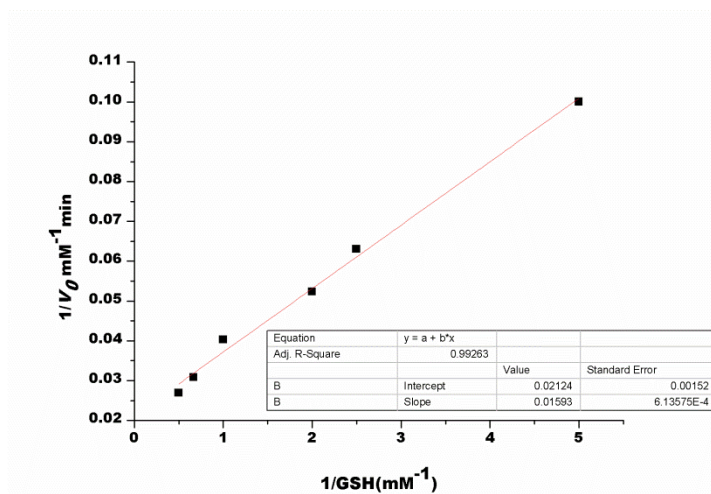

**Figure S12.** The Lineweaver-Burk (double-reciprocal) plots obtained for **11f•HCl** with the variation of GSH at the fixed concentration of *t*-BuOOH.

$$\text{Intercept} = 0.02124 \pm 0.00152$$

$$\text{Slop} = 0.01593 \pm 0.00061$$

$$V_{\max} = 62.77 \pm 0.30$$

$$K_m = 0.75 \pm 0.01$$

$$k_{\text{cat}} = 0.78 \pm 0.01$$

$$\eta = 1.05 \pm 0.01$$

**Table S12.** Summary for the effect of substrate (GSH) concentration on the initial rate of **11f•HCl**.

| [GSH]<br>(mM) | $v_0(\mu\text{M} \cdot \text{min}^{-1})$ | Mean<br>$v_0(\mu\text{M} \cdot \text{min}^{-1})$ | $1/[\text{GSH}]$<br>( $\text{mM}^{-1}$ ) | $1/v_0$<br>( $\mu\text{M}^{-1} \cdot \text{min}$ ) |
|---------------|------------------------------------------|--------------------------------------------------|------------------------------------------|----------------------------------------------------|
|               |                                          |                                                  |                                          |                                                    |

|     |        |              |        |            |
|-----|--------|--------------|--------|------------|
| 0.2 | 55.51  | 55.41 ±6.96  | 5.0000 | 0.0180472  |
|     | 48.40  |              |        |            |
|     | 62.32  |              |        |            |
| 0.4 | 78.03  | 78.08 ±2.09  | 2.5000 | 0.0128062  |
|     | 80.21  |              |        |            |
|     | 76.02  |              |        |            |
| 0.5 | 85.06  | 87.96 ±2.58  | 2.0000 | 0.0011367  |
|     | 88.83  |              |        |            |
|     | 90.01  |              |        |            |
| 1   | 135.74 | 137.17 ±9.24 | 1.0000 | 0.00728987 |
|     | 128.73 |              |        |            |
|     | 147.06 |              |        |            |
| 1.5 | 140.13 | 141.30 ±1.28 | 0.6667 | 0.00707714 |
|     | 142.67 |              |        |            |
|     | 141.10 |              |        |            |
| 2   | 153.46 | 151.61 ±1.76 | 0.5000 | 0.00659558 |
|     | 151.44 |              |        |            |
|     | 149.95 |              |        |            |

Assay conditions: phosphate buffer (100 mM), pH 7.5, with EDTA (1 mM), GSH (variable), NADPH (0.4 mM), GR (1.3 unit/mL), Cum-OOH (1.6 mM) and **11f•HCl** (80 μM).

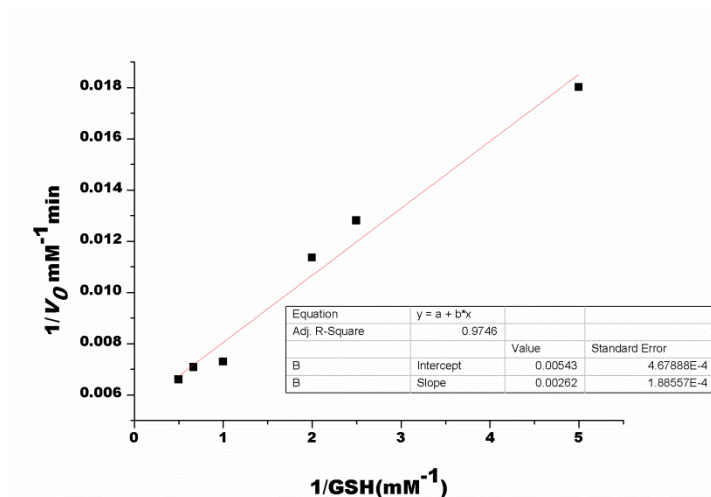

**Figure S13.** The Lineweaver-Burk (double-reciprocal) plots obtained for **11f•HCl** with the variation of GSH at the fixed concentration of Cum-OOH.

$$\text{Intercept} = 0.00543 \pm 0.00034$$

$$\text{Slop} = 0.00262 \pm 0.00014$$

$$V_{\text{max}} = 184.16 \pm 8.72$$

$$K_{\text{m}} = 0.48 \pm 0.01$$

$$k_{\text{cat}} = 2.30 \pm 0.02$$

$$\eta = 4.78 \pm 0.04$$

**Table S13.** Summary for the effect of substrate (GSH) concentration on the initial rate of **12k•HCl**.

| [GSH]<br>(mM) | $v_0(\mu\text{M} \cdot \text{min}^{-1})$ | Mean<br>$v_0(\mu\text{M} \cdot \text{min}^{-1})$ | $1/[\text{GSH}]$<br>(mM <sup>-1</sup> ) | $1/v_0$<br>( $\mu\text{M}^{-1} \cdot \text{min}$ ) |
|---------------|------------------------------------------|--------------------------------------------------|-----------------------------------------|----------------------------------------------------|
|               |                                          |                                                  |                                         |                                                    |

|     |                            |                |        |            |
|-----|----------------------------|----------------|--------|------------|
| 0.2 | 112.07<br>112.94<br>113.01 | 112.67 ± 0.52  | 5.0000 | 0.0088752  |
| 0.4 | 153.57<br>160.06<br>158.27 | 157.30 ± 3.35  | 2.5000 | 0.00635729 |
| 0.5 | 180.82<br>176.17<br>178.67 | 178.55 ± 2.32  | 2.0000 | 0.00560056 |
| 1   | 236.50<br>221.25<br>242.64 | 233.46 ± 11.01 | 1.0000 | 0.00428332 |
| 1.5 | 234.34<br>232.65<br>236.07 | 234.35 ± 5.34  | 0.6667 | 0.00426706 |
| 2   | 250.28<br>233.96<br>229.23 | 237.82 ± 11.04 | 0.5000 | 0.00420480 |

Assay conditions: phosphate buffer (100 mM), pH 7.5, with EDTA (1 mM), GSH (variable), NADPH (0.4 mM), GR (1.3 unit/mL), H<sub>2</sub>O<sub>2</sub> (1.6 mM) and **12k•HCl** (80 μM).

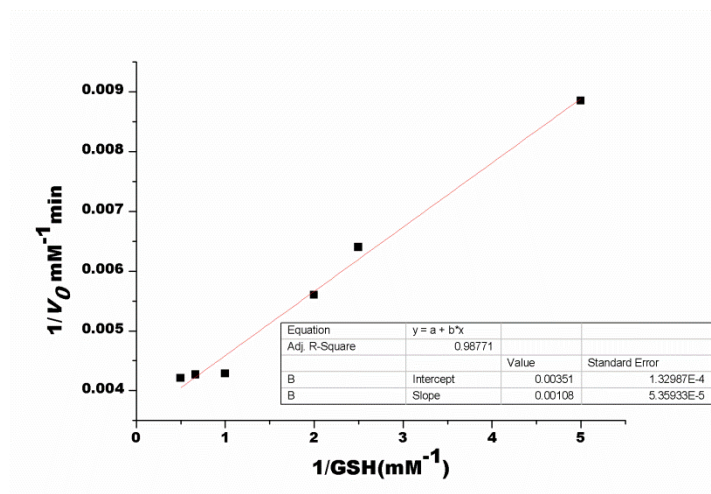

**Figure S14.** The Lineweaver-Burk (double-reciprocal) plots obtained for **12k•HCl** with the variation of GSH at the fixed concentration of H<sub>2</sub>O<sub>2</sub>.

$$\text{Intercept} = 0.00351 \pm 0.00013$$

$$\text{Slop} = 0.00108 \pm 0.00005$$

$$V_{\text{max}} = 284.90 \pm 7.12$$

$$K_{\text{m}} = 0.30 \pm 0.01$$

$$k_{\text{cat}} = 3.56 \pm 0.09$$

$$\eta = 11.87 \pm 0.30$$

**Table S14.** Summary for the effect of substrate (GSH) concentration on the initial rate of **12k•HCl**.

| [GSH]<br>(mM) | $v_0(\mu\text{M} \cdot \text{min}^{-1})$ | Mean<br>$v_0(\mu\text{M} \cdot \text{min}^{-1})$ | 1/[GSH]<br>(mM <sup>-1</sup> ) | 1/ $v_0$<br>( $\mu\text{M}^{-1} \cdot \text{min}$ ) |
|---------------|------------------------------------------|--------------------------------------------------|--------------------------------|-----------------------------------------------------|
| 0.2           | 29.89                                    | 29.99 ± 2.82                                     | 5.0000                         | 0.03333703                                          |

|     |                         |             |        |            |
|-----|-------------------------|-------------|--------|------------|
|     | 27.23                   |             |        |            |
|     | 32.87                   |             |        |            |
| 0.4 | 43.20<br>42.12<br>43.61 | 42.97 ±0.76 | 2.5000 | 0.02326284 |
| 0.5 | 47.02<br>46.91<br>47.07 | 47.00 ±0.10 | 2.0000 | 0.02127659 |
| 1   | 55.12<br>59.54<br>51.43 | 55.36 ±4.06 | 1.0000 | 0.01806249 |
| 1.5 | 62.69<br>64.32<br>60.55 | 62.52 ±1.89 | 0.6667 | 0.01599488 |
| 2   | 68.82<br>66.66<br>67.34 | 67.60 ±1.10 | 0.5000 | 0.01479144 |

Assay conditions: phosphate buffer (100 mM), pH 7.5, with EDTA (1 mM), GSH (variable), NADPH (0.4 mM), GR (1.3 unit/mL), *t*-BuOOH (1.6 mM) and **12k•HCl** (80 μM).

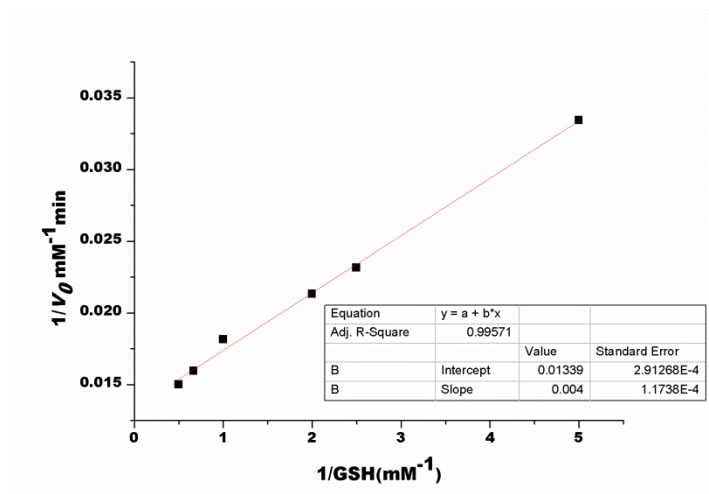

**Figure S15.** The Lineweaver-Burk (double-reciprocal) plots obtained for **12k•HCl** with the variation of GSH at the fixed concentration of *t*-BuOOH.

$$\text{Intercept} = 0.01339 \pm 0.00029$$

$$\text{Slop} = 0.004 \pm 0.00017$$

$$V_{\max} = 74.68 \pm 0.60$$

$$K_m = 0.30 \pm 0.01$$

$$k_{\text{cat}} = 0.94 \pm 0.01$$

$$\eta = 3.13 \pm 0.30$$

**Table S15.** Summary for the effect of substrate (GSH) concentration on the initial rate of **12k•HCl**.

| [GSH]<br>(mM) | $v_0(\mu\text{M}\cdot\text{min}^{-1})$ | Mean<br>$v_0(\mu\text{M}\cdot\text{min}^{-1})$ | 1/[GSH]<br>(mM <sup>-1</sup> ) | 1/ $v_0$<br>( $\mu\text{M}^{-1}\cdot\text{min}$ ) |
|---------------|----------------------------------------|------------------------------------------------|--------------------------------|---------------------------------------------------|
| 0.2           | 83.83                                  | 83.29 ± 0.46                                   | 5.0000                         | 0.01200528                                        |



|     |                            |               |        |            |
|-----|----------------------------|---------------|--------|------------|
|     | 83.04                      |               |        |            |
|     | 83.02                      |               |        |            |
| 0.4 | 120.75<br>128.03<br>112.05 | 120.27 ±8.00  | 2.5000 | 0.00831416 |
| 0.5 | 132.28<br>150.31<br>124.04 | 135.54 ±13.43 | 2.0000 | 0.00737771 |
| 1   | 167.18<br>169.87<br>160.57 | 165.87 ±4.78  | 1.0000 | 0.00602869 |
| 1.5 | 179.53<br>183.38<br>182.59 | 181.83 ±2.03  | 0.6667 | 0.00549954 |
| 2   | 191.35<br>187.67<br>192.49 | 190.50 ±2.51  | 0.5000 | 0.00524925 |

Assay conditions: phosphate buffer (100 mM), pH 7.5, with EDTA (1 mM), GSH (variable), NADPH (0.4 mM), GR (1.3 unit/mL), Cum-OOH (1.6 mM) and **12k•HCl** (80 μM).

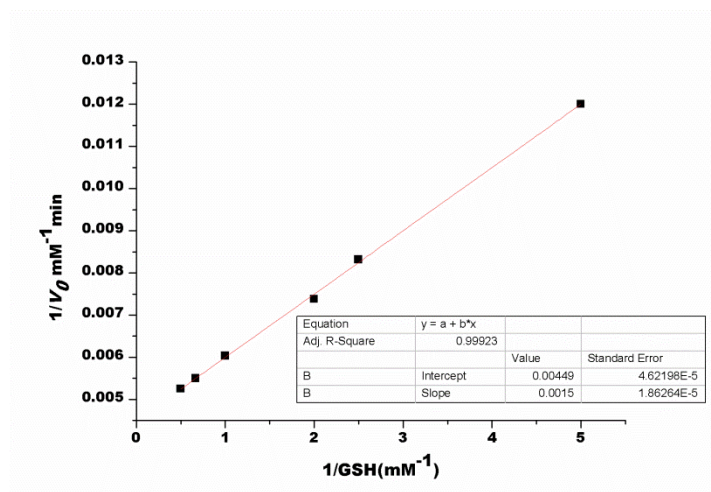

**Figure S16.** The Lineweaver-Burk (double-reciprocal) plots obtained for **12k•HCl** with the variation of GSH at the fixed concentration of Cum-OOH.

$$\text{Intercept} = 0.00449 \pm 0.000046$$

$$\text{Slop} = 0.00150 \pm 0.000018$$

$$V_{\text{max}} = 222.71 \pm 1.79$$

$$K_{\text{m}} = 0.33 \pm 0.01$$

$$k_{\text{cat}} = 2.78 \pm 0.01$$

$$\eta = 8.42 \pm 0.03$$

**Table S16.** Summary for the effect of substrate (GSH) concentration on the initial rate of **ebsele**.

| [GSH]<br>(mM) | $v_0(\mu\text{M} \cdot \text{min}^{-1})$ | Mean<br>$v_0(\mu\text{M} \cdot \text{min}^{-1})$ | 1/[GSH]<br>(mM <sup>-1</sup> ) | 1/ $v_0$<br>( $\mu\text{M}^{-1} \cdot \text{min}$ ) |
|---------------|------------------------------------------|--------------------------------------------------|--------------------------------|-----------------------------------------------------|
|               |                                          |                                                  |                                |                                                     |

|     |                            |              |        |            |
|-----|----------------------------|--------------|--------|------------|
| 1.0 | 94.67<br>92.51<br>92.21    | 93.13 ±1.34  | 1.0000 | 0.01073767 |
| 1.5 | 107.33<br>105.49<br>111.72 | 108.18 ±3.20 | 0.6667 | 0.00924385 |
| 2.0 | 120.40<br>117.33<br>123.43 | 120.38 ±3.05 | 0.5000 | 0.00830656 |
| 3.0 | 138.73<br>138.82<br>132.57 | 136.70 ±3.58 | 0.3333 | 0.00731493 |
| 4.0 | 150.56<br>153.21<br>147.32 | 150.36 ±2.94 | 0.2500 | 0.00665055 |
| 5.0 | 160.21<br>162.32<br>158.46 | 160.33 ±1.93 | 0.2000 | 0.00623713 |

Assay conditions: phosphate buffer (100 mM), pH 7.5, with EDTA (1 mM), GSH (variable), NADPH (0.4 mM), GR (1.3 unit/mL), H<sub>2</sub>O<sub>2</sub> (1.6 mM) and **eselen** (80 μM).

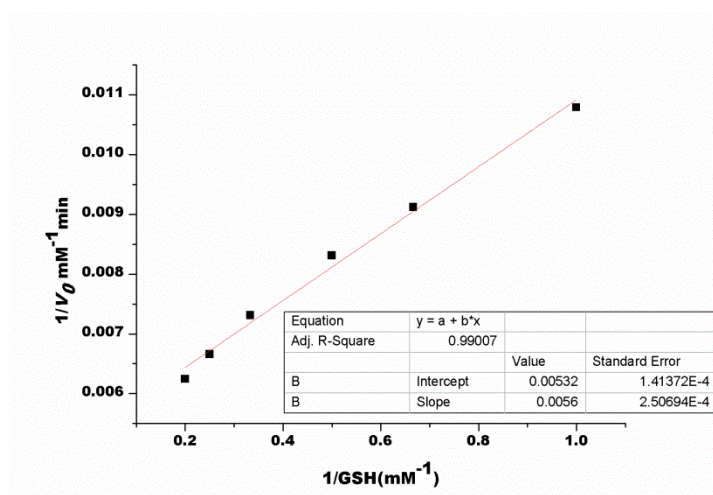

**Figure S17.** The Lineweaver-Burk (double-reciprocal) plots obtained for **ebselen** with the variation of GSH at the fixed concentration of H<sub>2</sub>O<sub>2</sub>.

$$\text{Intercept} = 0.00532 \pm 0.00014$$

$$\text{Slop} = 0.0056 \pm 0.00025$$

$$V_{\max} = 187.96 \pm 2.77$$

$$K_m = 1.05 \pm 0.01$$

$$k_{\text{cat}} = 2.35 \pm 0.03$$

$$\eta = 2.23 \pm 0.02$$

**Table S17.** Summary for the effect of substrate (GSH) concentration on the initial rate of **ebselen**.

| [GSH] | $v_0(\mu\text{M} \cdot \text{min}^{-1})$ | Mean | $1/[\text{GSH}]$ | $1/v_0$ |
|-------|------------------------------------------|------|------------------|---------|
|-------|------------------------------------------|------|------------------|---------|

| (mM) |       | $v_0(\mu\text{M}\cdot\text{min}^{-1})$ | (mM <sup>-1</sup> ) | ( $\mu\text{M}^{-1}\cdot\text{min}$ ) |
|------|-------|----------------------------------------|---------------------|---------------------------------------|
| 0.2  | 6.40  | 8.44 ± 2.81                            | 5.0000              | 0.11843663                            |
|      | 11.66 |                                        |                     |                                       |
|      | 7.27  |                                        |                     |                                       |
| 0.5  | 13.41 | 15.51 ± 2.10                           | 2.0000              | 0.06447453                            |
|      | 17.62 |                                        |                     |                                       |
|      | 15.50 |                                        |                     |                                       |
| 1    | 21.30 | 22.12 ± 8.44                           | 1.0000              | 0.04520795                            |
|      | 14.11 |                                        |                     |                                       |
|      | 30.95 |                                        |                     |                                       |
| 1.5  | 27.88 | 28.19 ± 0.31                           | 0.6667              | 0.03546937                            |
|      | 28.50 |                                        |                     |                                       |
|      | 28.20 |                                        |                     |                                       |
| 2    | 33.41 | 33.42 ± 1.10                           | 0.5000              | 0.02991921                            |
|      | 32.34 |                                        |                     |                                       |
|      | 34.52 |                                        |                     |                                       |
| 3    | 34.32 | 34.37 ± 1.10                           | 0.3333              | 0.02909514                            |
|      | 35.23 |                                        |                     |                                       |
|      | 33.56 |                                        |                     |                                       |

Assay conditions: phosphate buffer (100 mM), pH 7.5, with EDTA (1 mM), GSH (variable), NADPH (0.4 mM), GR (1.3 unit/mL), *t*-BuOOH (1.6 mM) and **eb**selen (80  $\mu\text{M}$ ).

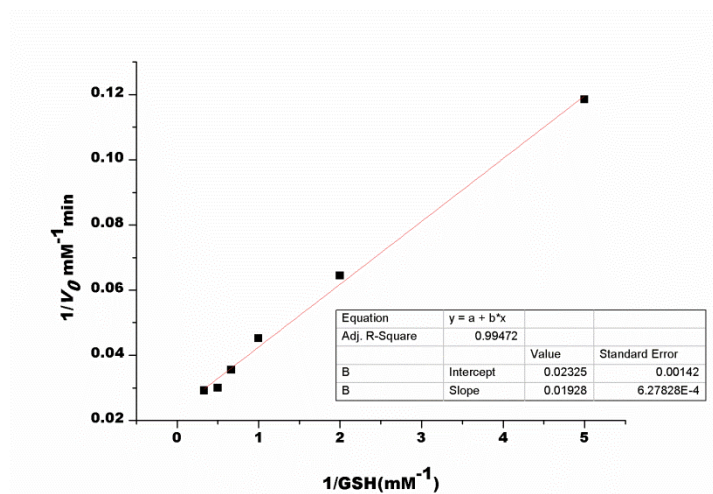

**Figure S18.** The Lineweaver-Burk (double-reciprocal) plots obtained for **ebselen** with the variation of GSH at the fixed concentration of *t*-BuOOH.

$$\text{Intercept} = 0.02325 \pm 0.00142$$

$$\text{Slop} = 0.01928 \pm 0.00062$$

$$V_{\max} = 43.01 \pm 0.60$$

$$K_m = 0.83 \pm 0.01$$

$$k_{\text{cat}} = 0.54 \pm 0.07$$

$$\eta = 0.65 \pm 0.08$$

**Table S18.** Summary for the effect of substrate (GSH) concentration on the initial rate of **ebselen**.

| [GSH]<br>(mM) | $v_0(\mu\text{M} \cdot \text{min}^{-1})$ | Mean<br>$v_0(\mu\text{M} \cdot \text{min}^{-1})$ | $1/[\text{GSH}]$<br>( $\text{mM}^{-1}$ ) | $1/v_0$<br>( $\mu\text{M}^{-1} \cdot \text{min}$ ) |
|---------------|------------------------------------------|--------------------------------------------------|------------------------------------------|----------------------------------------------------|
|               |                                          |                                                  |                                          |                                                    |

|     |       |             |        |            |
|-----|-------|-------------|--------|------------|
| 0.2 | 8.41  | 11.60 ±2.76 | 5.0000 | 0.08620689 |
|     | 13.15 |             |        |            |
|     | 13.24 |             |        |            |
| 0.5 | 19.99 | 20.10 ±0.71 | 2.0000 | 0.04973474 |
|     | 20.87 |             |        |            |
|     | 19.46 |             |        |            |
| 1   | 32.53 | 32.64 ±0.13 | 1.0000 | 0.03063099 |
|     | 32.62 |             |        |            |
|     | 32.79 |             |        |            |
| 1.5 | 46.38 | 47.75 ±1.28 | 0.6667 | 0.02093948 |
|     | 48.93 |             |        |            |
|     | 47.96 |             |        |            |
| 2   | 51.73 | 50.47 ±2.24 | 0.5000 | 0.01981112 |
|     | 47.88 |             |        |            |
|     | 51.82 |             |        |            |
| 3   | 58.31 | 58.51 ±0.22 | 0.3333 | 0.01708914 |
|     | 58.75 |             |        |            |
|     | 58.49 |             |        |            |

Assay conditions: phosphate buffer (100 mM), pH 7.5, with EDTA (1 mM), GSH (variable), NADPH (0.4 mM), GR (1.3 unit/mL), Cum-OOH (1.6 mM) and **eb**selen (80 μM).

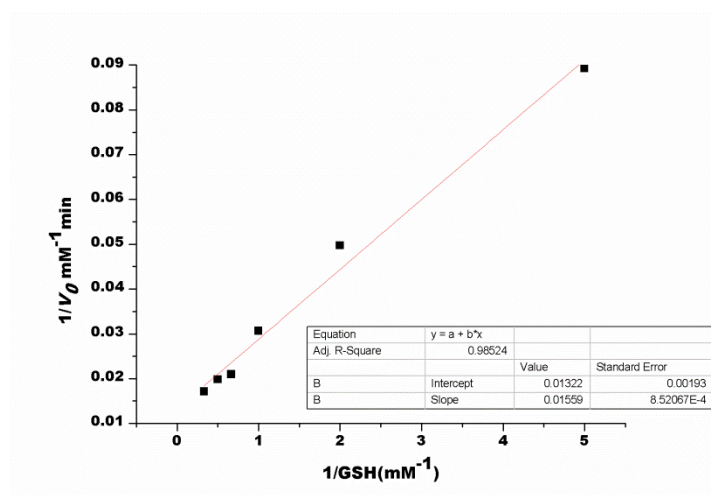

**Figure S19.** The Lineweaver-Burk (double-reciprocal) plots obtained for **ebselen** with the variation of GSH at the fixed concentration of Cum-OOH.

$$\text{Intercept} = 0.01322 \pm 0.00193$$

$$\text{Slop} = 0.01559 \pm 0.00085$$

$$V_{\text{max}} = 75.64 \pm 4.21$$

$$K_{\text{m}} = 1.18 \pm 0.06$$

$$k_{\text{cat}} = 0.95 \pm 0.05$$

$$\eta = 0.80 \pm 0.04$$



## 5. Scavenging peroxide by GSH in the Presence of Compound

### Scavenging H<sub>2</sub>O<sub>2</sub>

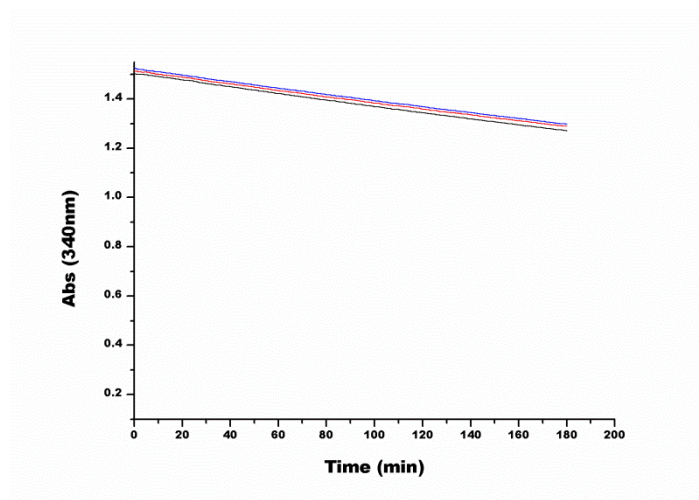

**Figure S20. (Control)** Rate of consumption for H<sub>2</sub>O<sub>2</sub> in the absence of catalyst with time. Assay conditions: reactions were carried out with phosphate buffer (100 mM), pH 7.5, with EDTA (1 mM), GSH (0.25 mM), NADPH (0.50 mM), glutathione reductase(1.3 unit/ml), and H<sub>2</sub>O<sub>2</sub>(0.20 mM).

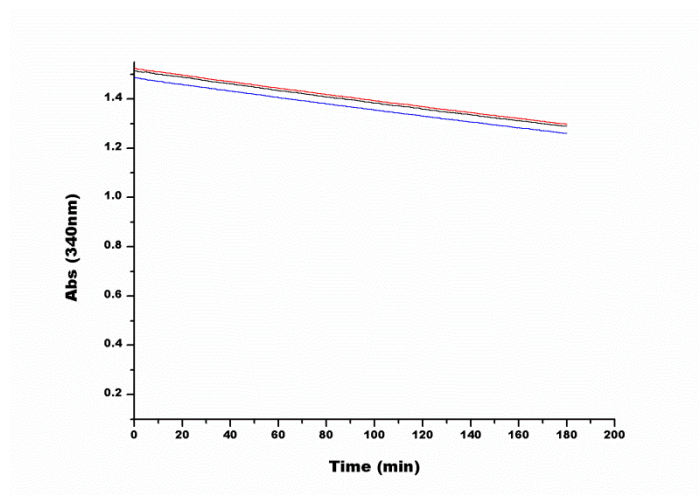

**Figure S21. (CQ)** Rate of consumption for H<sub>2</sub>O<sub>2</sub> in the absence of catalyst with time. Assay conditions: reactions were carried out with phosphate buffer (100 mM), pH 7.5, with EDTA (1 mM), GSH (0.25 mM), NADPH (0.50 mM), glutathione reductase(1.3 unit/ml), and H<sub>2</sub>O<sub>2</sub>(0.20 mM).

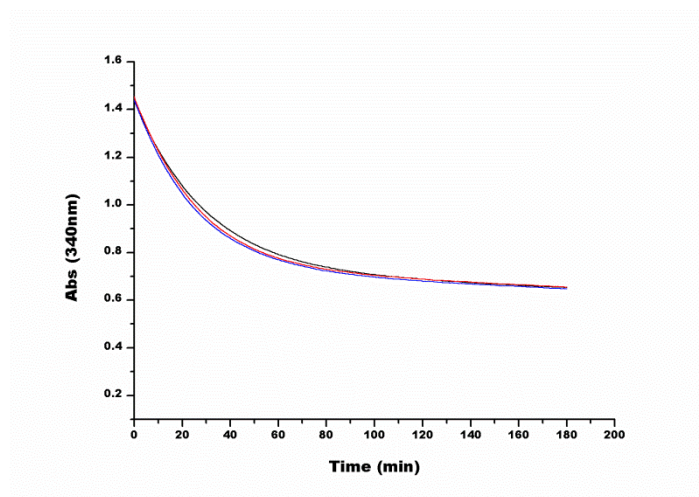

**Figure S22. (ebselen)** Rate of consumption for H<sub>2</sub>O<sub>2</sub> in the presence of catalyst with time. Assay conditions: reactions were carried out with phosphate buffer (100 mM), pH 7.5, with EDTA (1 mM), GSH (0.25 mM), NADPH (0.50 mM), glutathione reductase(1.3 unit/ml), and H<sub>2</sub>O<sub>2</sub>(0.20 mM).

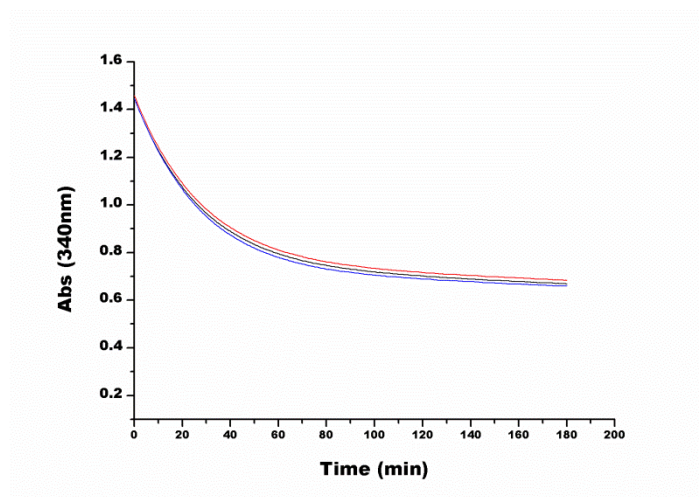

**Figure S23. (11f•HCl)** Rate of consumption for H<sub>2</sub>O<sub>2</sub> in the presence of catalyst with time. Assay conditions: reactions were carried out with phosphate buffer (100 mM), pH 7.5, with EDTA (1 mM), GSH (0.25 mM), NADPH (0.50 mM), glutathione reductase(1.3 unit/ml), and H<sub>2</sub>O<sub>2</sub>(0.20 mM).

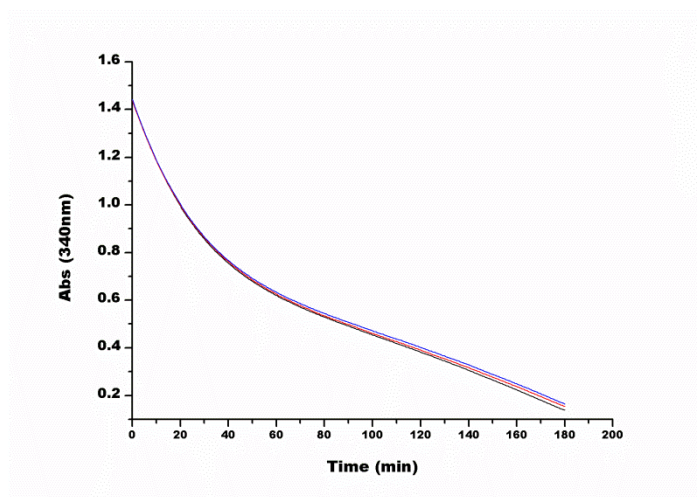

**Figure S24. (12k•HCl)** Rate of consumption for H<sub>2</sub>O<sub>2</sub> in the presence of catalyst with time. Assay conditions: reactions were carried out with phosphate buffer (100 mM), pH 7.5, with EDTA (1 mM), GSH (0.25 mM), NADPH (0.50 mM), glutathione reductase(1.3 unit/ml), and H<sub>2</sub>O<sub>2</sub>(0.20 mM).

**Scavenging *t*-BuOOH**

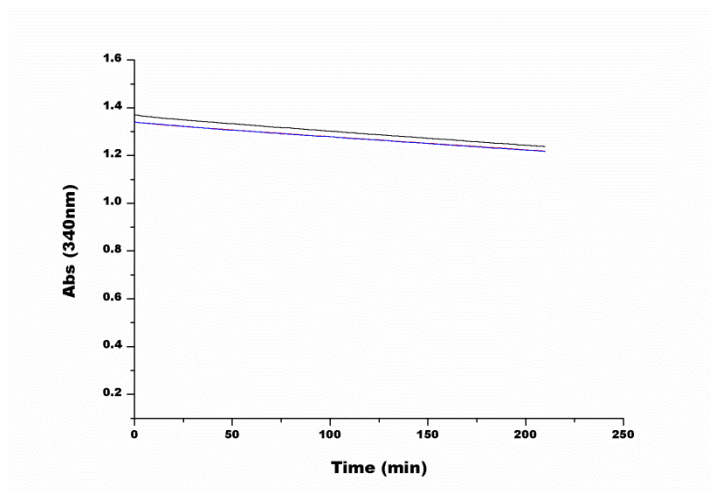

**Figure S25. (Control)** Rate of consumption for *t*-BuOOH in the absence of catalyst with time.

Assay conditions: reactions were carried out with phosphate buffer (100 mM), pH 7.5, with EDTA (1 mM), GSH (0.25 mM), NADPH (0.50 mM), glutathione reductase(1.3 unit/ml), and *t*-BuOOH (0.20 mM).

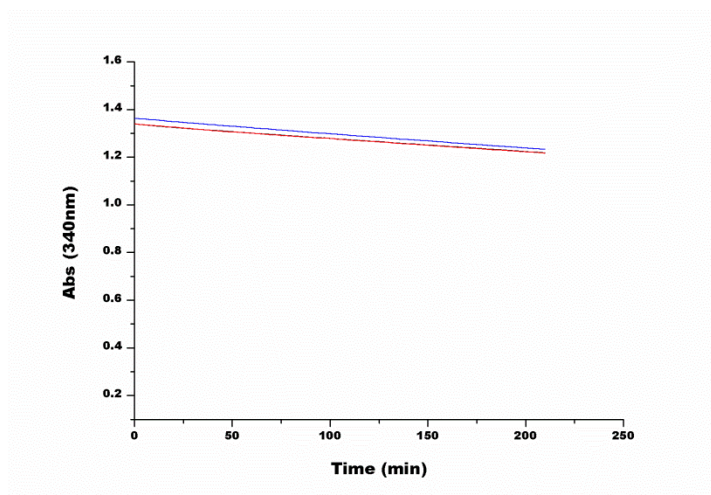

**Figure S26. (CQ)** Rate of consumption for *t*-BuOOH in the presence of catalyst with time. Assay conditions: reactions were carried out with phosphate buffer (100 mM), pH 7.5, with EDTA (1 mM), GSH (0.25 mM), NADPH (0.50 mM), glutathione reductase(1.3 unit/ml), and *t*-BuOOH (0.20 mM).

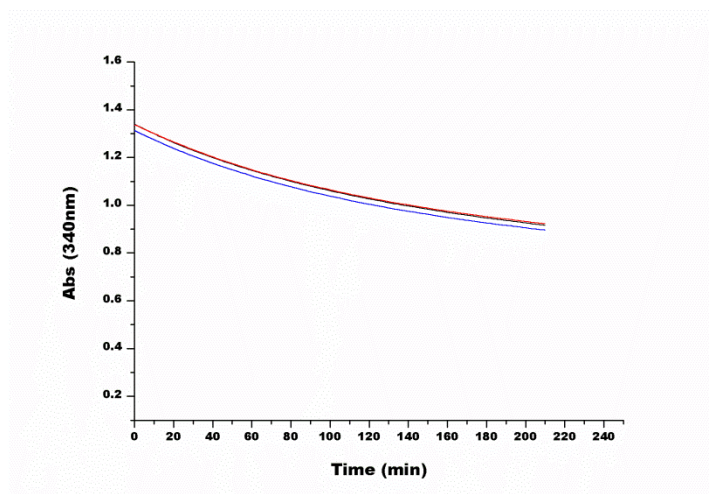

**Figure S27. (ebselen)** Rate of consumption for *t*-BuOOH in the presence of catalyst with time.

Assay conditions: reactions were carried out with phosphate buffer (100 mM), pH 7.5, with EDTA (1 mM), GSH (0.25 mM), NADPH (0.50 mM), glutathione reductase(1.3 unit/ml), and *t*-BuOOH (0.20 mM).

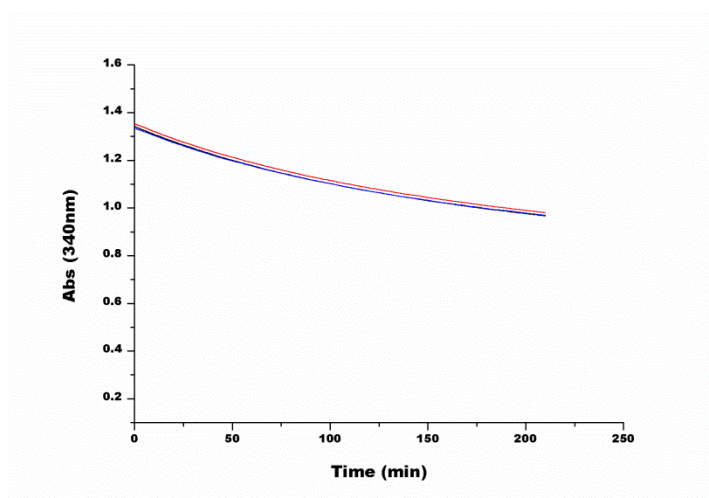

**Figure S28. (11f•HCl)** Rate of consumption for *t*-BuOOH in the presence of catalyst with time.

Assay conditions: reactions were carried out with phosphate buffer (100 mM), pH 7.5, with EDTA (1 mM), GSH (0.25 mM), NADPH (0.50 mM), glutathione reductase(1.3 unit/ml), and *t*-BuOOH (0.20 mM).

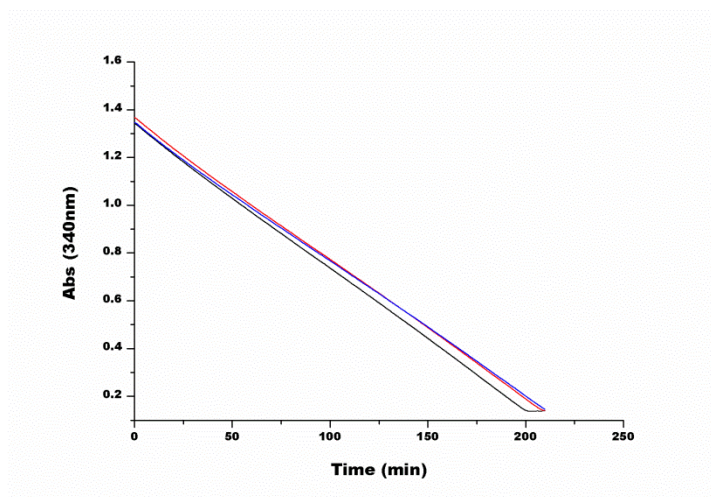

**Figure S29. (12k•HCl)** Rate of consumption for *t*-BuOOH in the presence of catalyst with time.

Assay conditions: reactions were carried out with phosphate buffer (100 mM), pH 7.5, with EDTA (1 mM), GSH (0.25 mM), NADPH (0.50 mM), glutathione reductase(1.3 unit/ml), and *t*-BuOOH (0.20 mM).

### Scavenging Cum-OOH

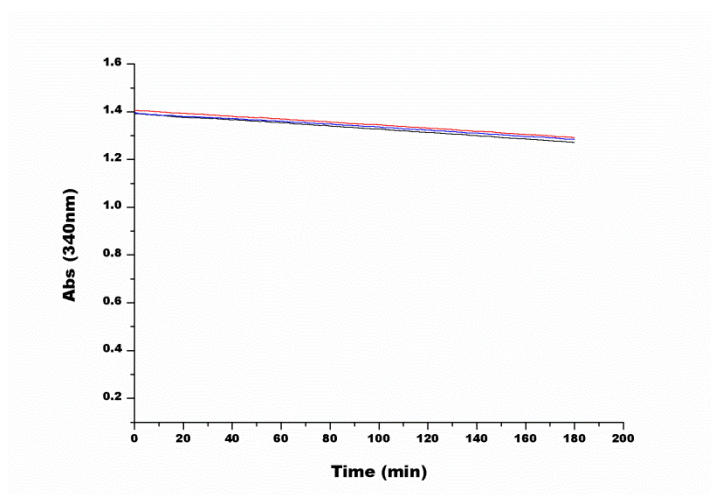

**Figure S30. (Control)** Rate of consumption for Cum-OOH in the absence of catalyst with time.

Assay conditions: reactions were carried out with phosphate buffer (100 mM), pH 7.5, with EDTA (1 mM), GSH (0.25 mM), NADPH (0.50 mM), glutathione reductase(1.3 unit/ml), and Cum-OOH



(0.20 mM).

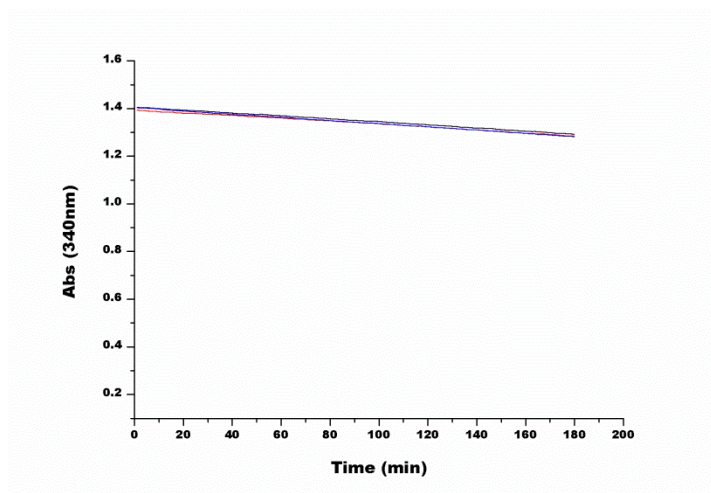

**Figure S31. (CQ)** Rate of consumption for Cum-OOH in the presence of catalyst with time. Assay conditions: reactions were carried out with phosphate buffer (100 mM), pH 7.5, with EDTA (1 mM), GSH (0.25 mM), NADPH (0.50 mM), glutathione reductase(1.3 unit/ml), and Cum-OOH (0.20 mM).

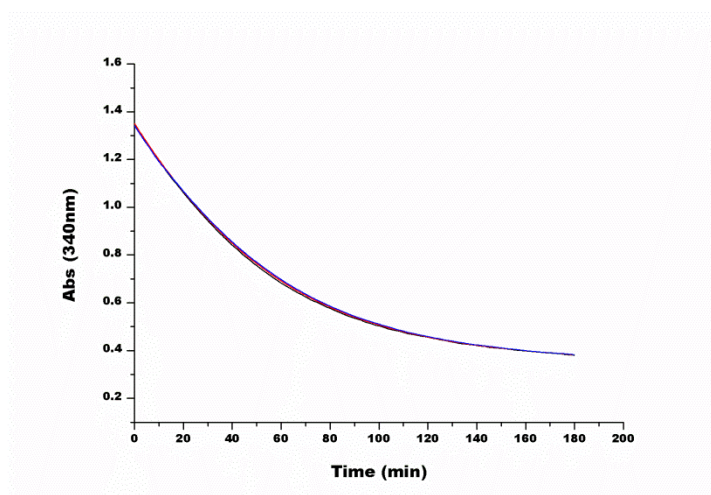

**Figure S32. (Ebselen)** Rate of consumption for Cum-OOH in the presence of catalyst with time. Assay conditions: reactions were carried out with phosphate buffer (100 mM), pH 7.5, with EDTA (1 mM), GSH (0.25 mM), NADPH (0.50 mM), glutathione reductase(1.3 unit/ml), and Cum-OOH

(0.20 mM).

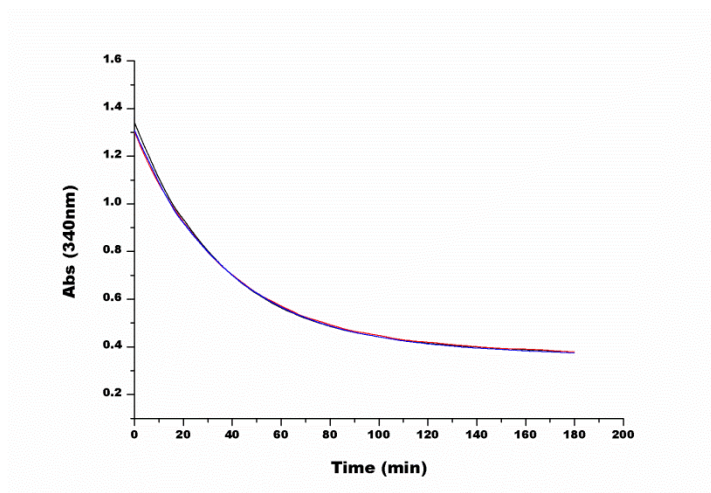

**Figure S33.** (11f•HCl) Rate of consumption for Cum-OOH in the presence of catalyst with time.

Assay conditions: reactions were carried out with phosphate buffer (100 mM), pH 7.5, with EDTA (1 mM), GSH (0.25 mM), NADPH (0.50 mM), glutathione reductase(1.3 unit/ml), and Cum-OOH (0.20 mM).

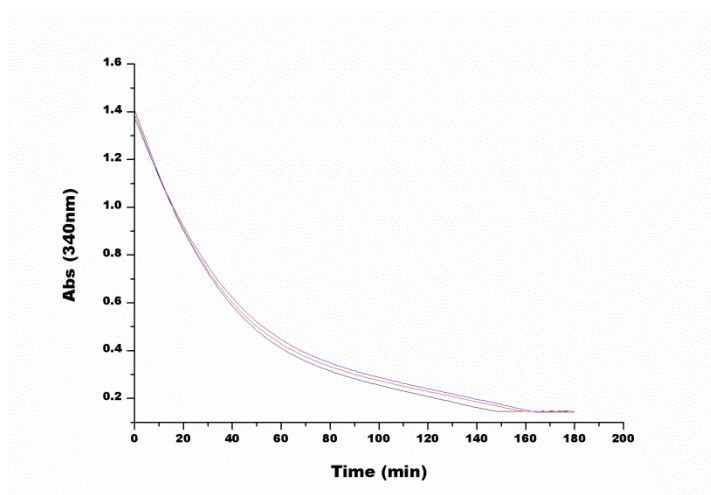

**Figure S34.** (12k•HCl) Rate of consumption for Cum-OOH in the presence of catalyst with time.

Assay conditions: reactions were carried out with phosphate buffer (100 mM), pH 7.5, with EDTA (1 mM), GSH (0.25 mM), NADPH (0.50 mM), glutathione reductase(1.3 unit/ml), and Cum-OOH



(0.20 mM).

## 6. Mechanism of the GPx-like catalytic cycle

The  $^{77}\text{Se}$  NMR spectra were recorded using  $\text{Me}_2\text{Se}$  as external standards on a Bruker AvanceIII spectrometer at 76 MHz. The high-resolution mass spectra (HRMS) were obtained using a Shimadzu LCMS-IT-TOF mass spectrometer.

### Isolation of Selenol

Hybrid compound (5 mg) in a three-necked round-bottomed flask (4 mL  $\text{CH}_3\text{OH}/\text{H}_2\text{O}$  (3:1)) kept under argon atmosphere was treated with 1 equivalent of GSH. The reaction mixture was stirred for 20 minutes. After the hybrid compound completely converted to the selenenyl sulfides, another equivalent of GSH and 1 equivalent of iodoacetic acid was added, the reaction mixture was further stirred for 24 h. The reaction was analyzed by the HRMS. The results showed only selenenyl sulfides and selenol (trapped by generating selenide with iodoacetic acid) produced in the cycle. It indicates that the production diselenide intermediated is not facile using GSH as a substrate.

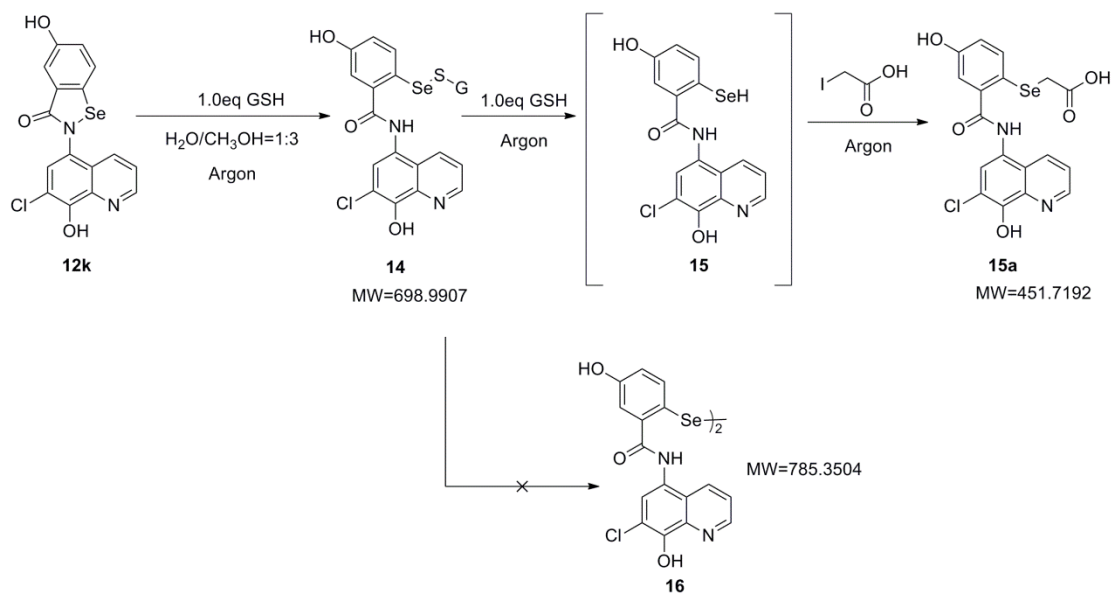

**Scheme S1.** Trapped selenol by generating selenide **15a** with iodoacetic acid in argon atmosphere.

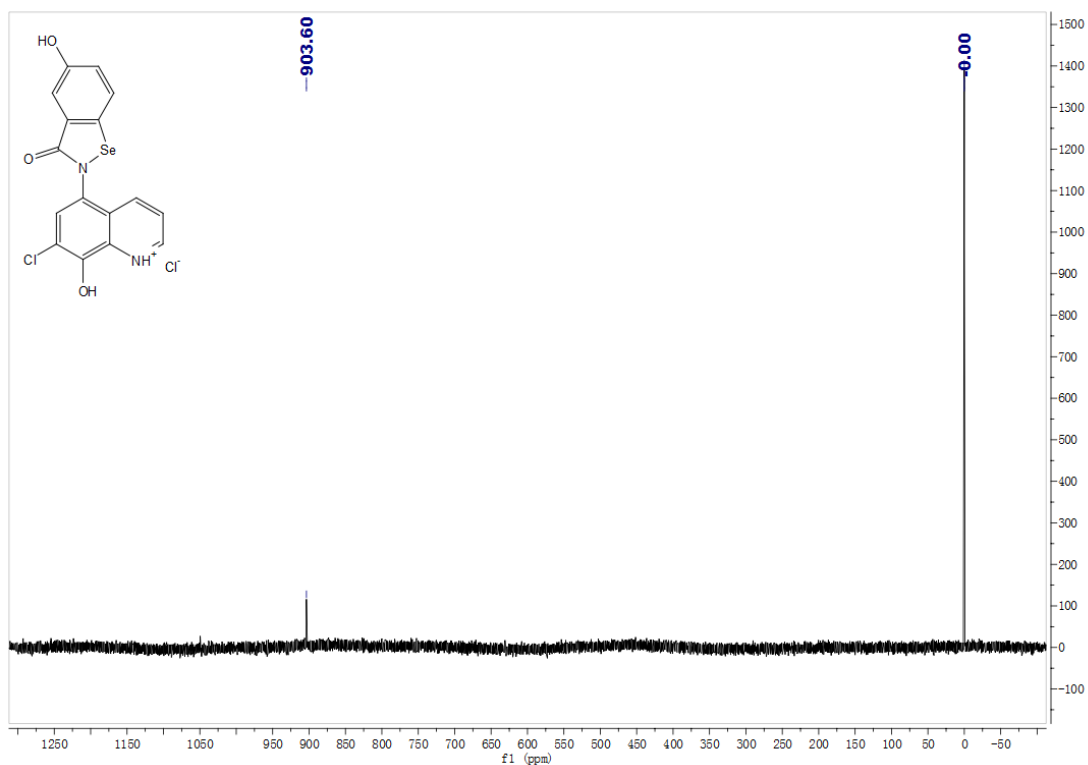

**Figure S35.**  $^{77}\text{Se}$  NMR spectra of **12k** in  $\text{DMSO-}d_6$

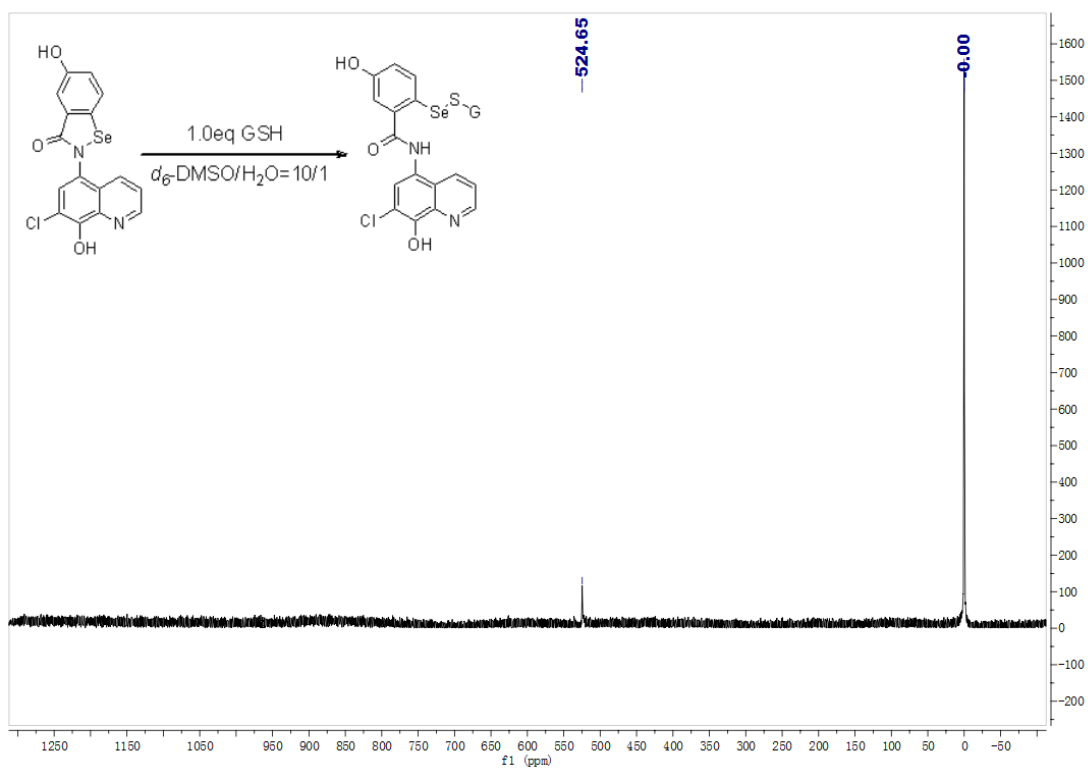

**Figure S36.**  $^{77}\text{Se}$  NMR spectra of selenenyl sulfides **14** obtained from the reaction of **12k** with GSH (1.0 equiv).

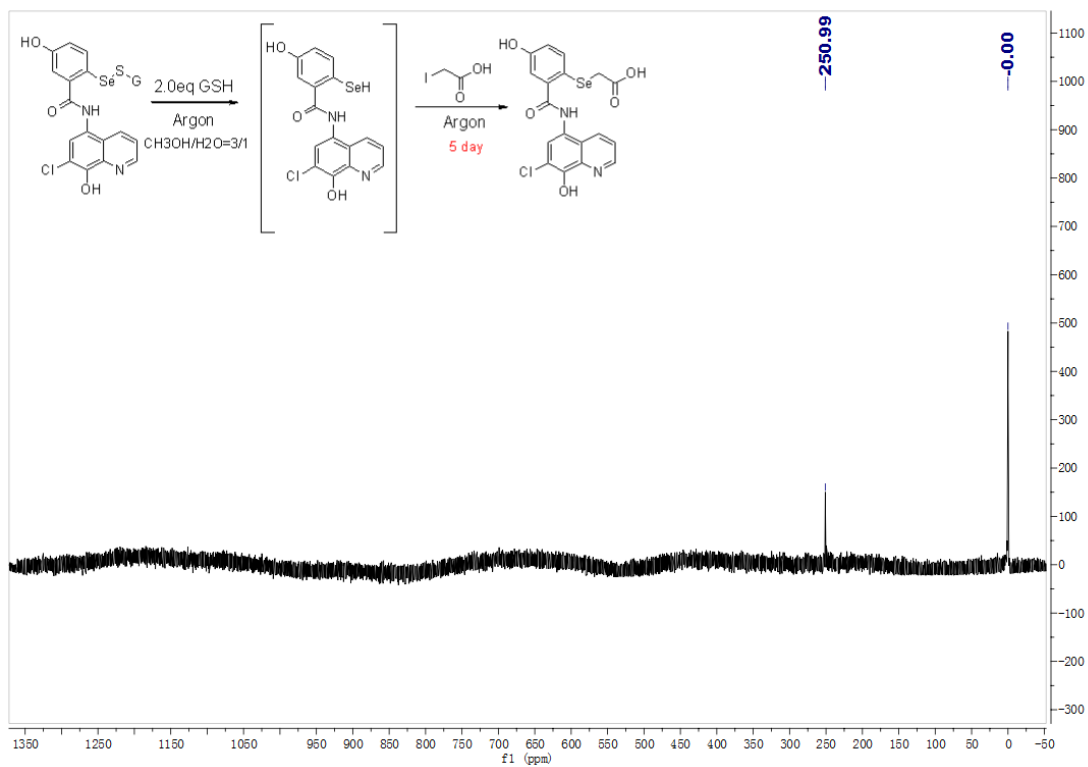

**Figure S37.**  $^{77}\text{Se}$  NMR spectra of selenide **15a** (in  $\text{DMSO-}d_6$ ) obtained from the the reaction of selenenyl sulfides **14** with GSH (2.0 equiv) and iodoacetic acid (1.0 equiv) under argon atmosphere for 5 days.

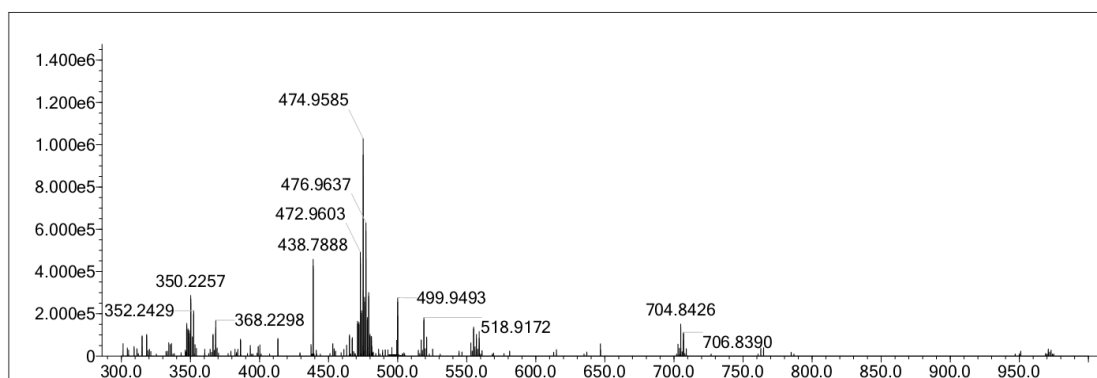

**Figure S38.** HRMS spectra of **15a** obtained from the the reaction of selenenyl sulfides **14** with GSH (2.0 equiv) and iodoacetic acid (1.0 equiv) under argon atmosphere for 12 h.

$[\text{M}+\text{Na}]^+$  for **15a**  $\text{C}_{18}\text{H}_{13}\text{N}_2\text{O}_5\text{ClSe}$  pred. 474.9585, meas. 474.9569

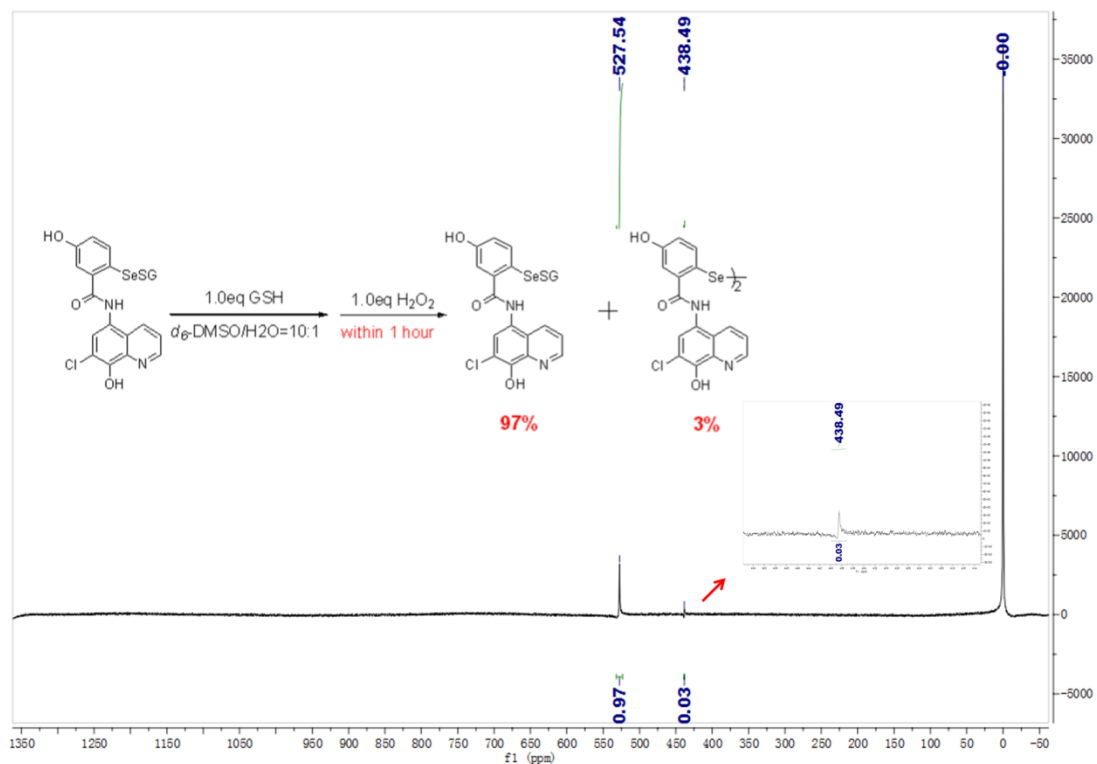

**Figure S39.**  $^{77}\text{Se}$  NMR spectra of selenenyl sulfides **14** ( $\delta$  527 ppm) and diselenide **16** ( $\delta$  438 ppm) obtained from the the reaction of selenenyl sulfides **14** and GSH (1.0 equiv) with  $\text{H}_2\text{O}_2$  (1.0 equiv) in  $\text{DMSO-}d_6/\text{H}_2\text{O} = 10/1$  mixture within 1 hour.

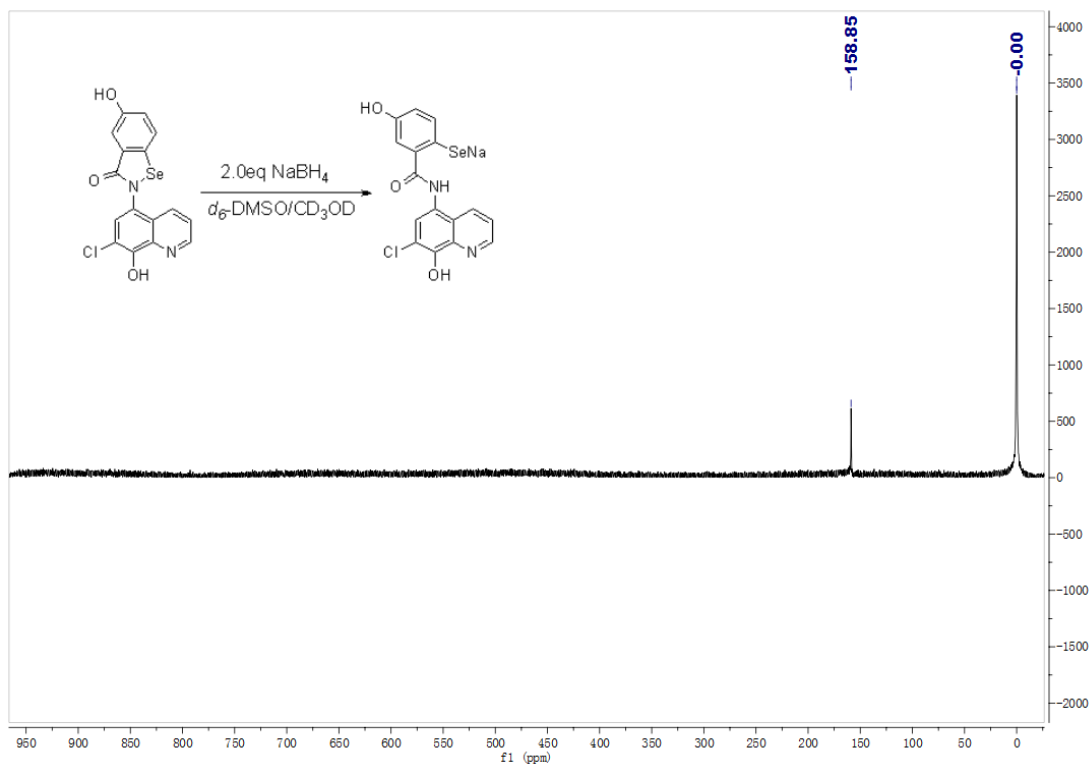

**Figure S40.**  $^{77}\text{Se}$ -NMR spectra of sodium selenolate obtained from the reduction of **12k** with  $\text{NaBH}_4$  in  $\text{DMSO-}d_6/\text{CD}_3\text{OD} = 10/1$  mixture

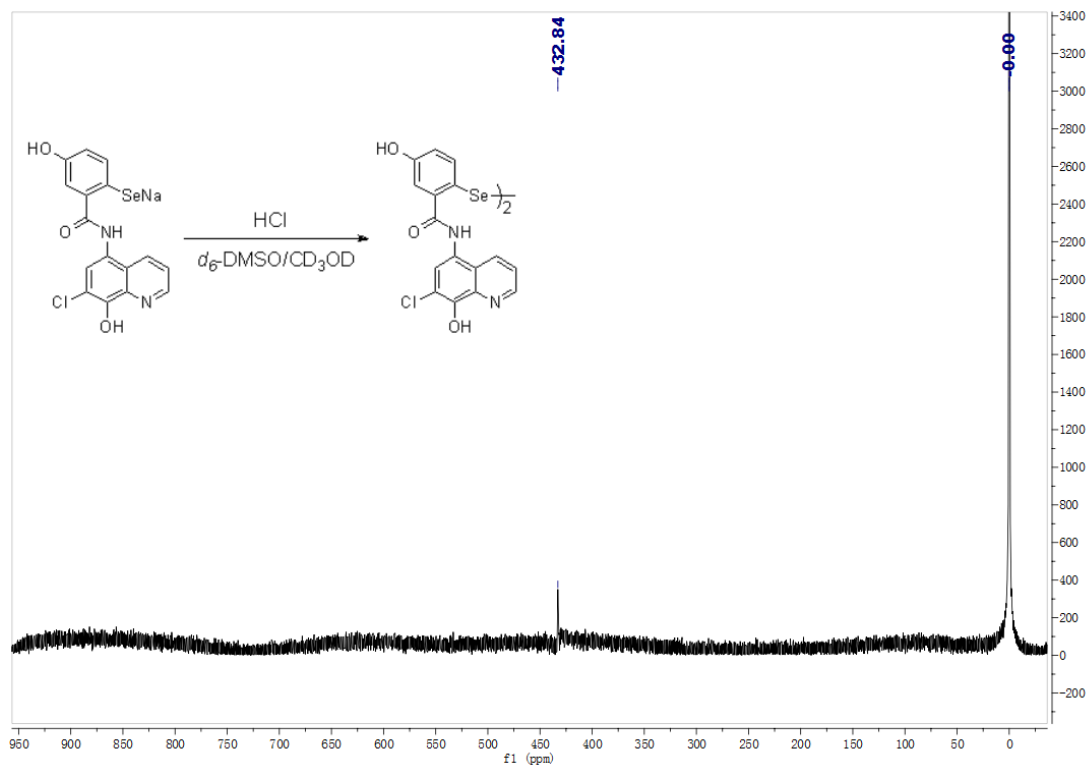

**Figure S41.**  $^{77}\text{Se}$ -NMR spectra of diselenide **16** obtained from the acidification of the sodium selenolate with HCl solution (10%) in  $\text{DMSO-}d_6/\text{CD}_3\text{OD} = 10/1$  mixture under air atmosphere.

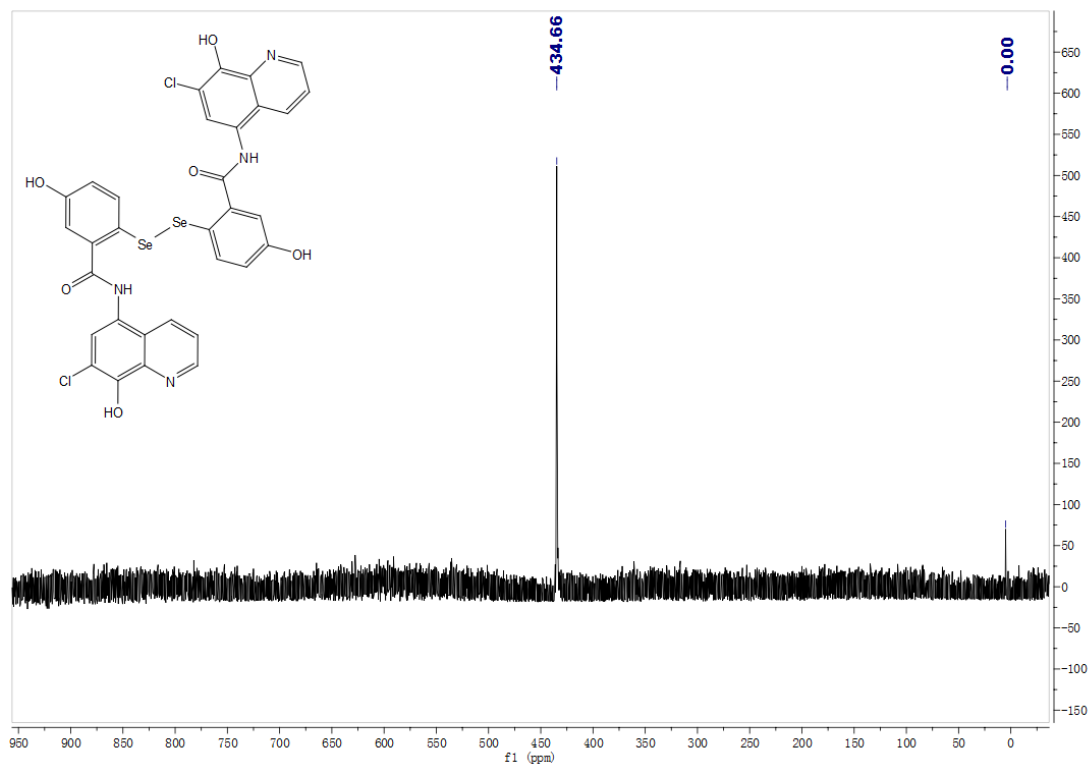

**Figure S42.**  $^{77}\text{Se}$ -NMR spectra of pure diselenide **16** (in  $\text{DMSO-}d_6$ ) obtained from the acidification of the sodium selenolate with HCl solution (10%) in  $\text{CH}_3\text{OH}$  mixture under air atmosphere.



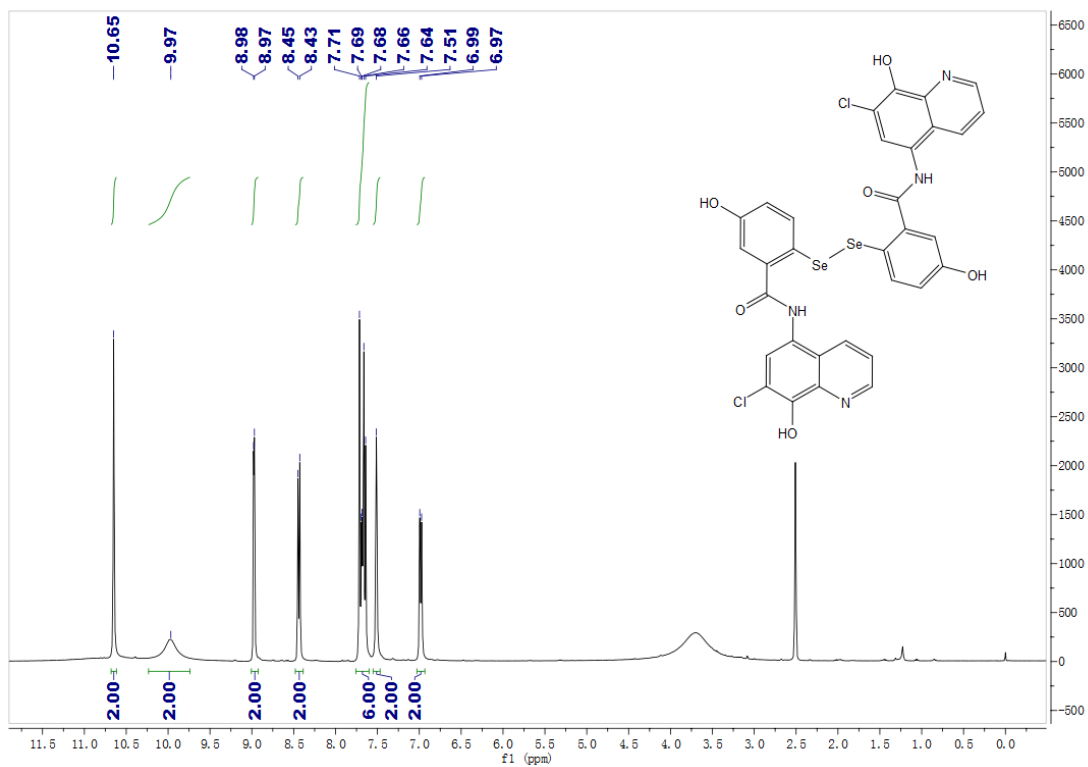

**Figure S43.**  $^1\text{H-NMR}$  spectra of pure diselenide **16** (in  $\text{DMSO-}d_6$ ) obtained from the acidification of the sodium selenolate with HCl solution (10%) in  $\text{CH}_3\text{OH}$  mixture under air atmosphere.

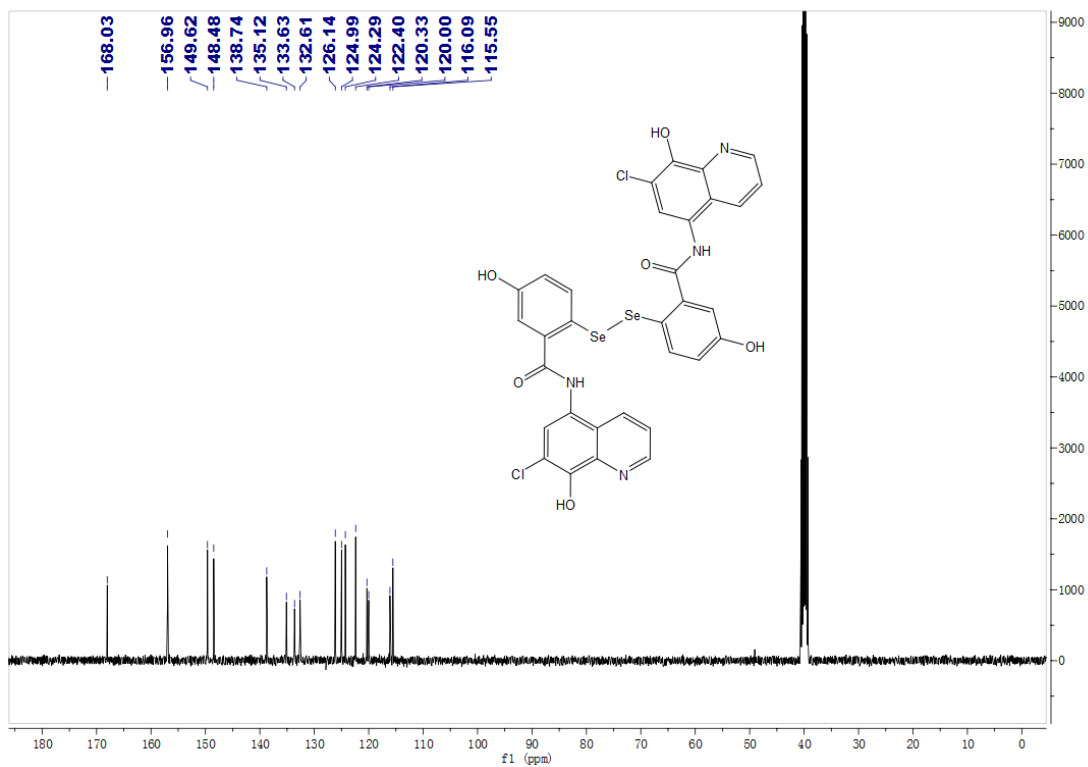

**Figure S44.**  $^{13}\text{C}$ -NMR spectra of pure diselenide **16** (in  $\text{DMSO-}d_6$ ) obtained from the acidification of the sodium selenolate with HCl solution (10%) in  $\text{CH}_3\text{OH}$  mixture under air atmosphere.

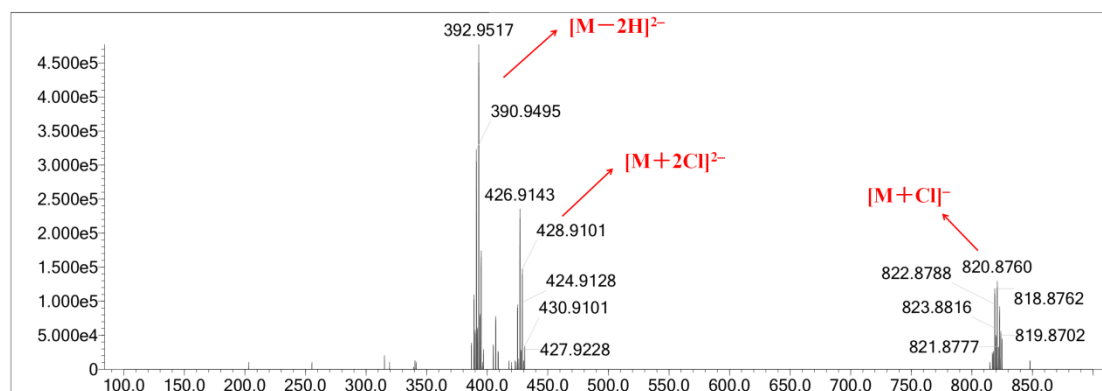

**Figure S45.** HRMS spectra of pure diselenide **16**.  $[\text{M}+\text{Cl}]^-$  for **16**  $\text{C}_{32}\text{H}_{20}\text{N}_4\text{O}_6\text{Cl}_2\text{Se}_2$  pred.

820.8783, meas. 820.8760

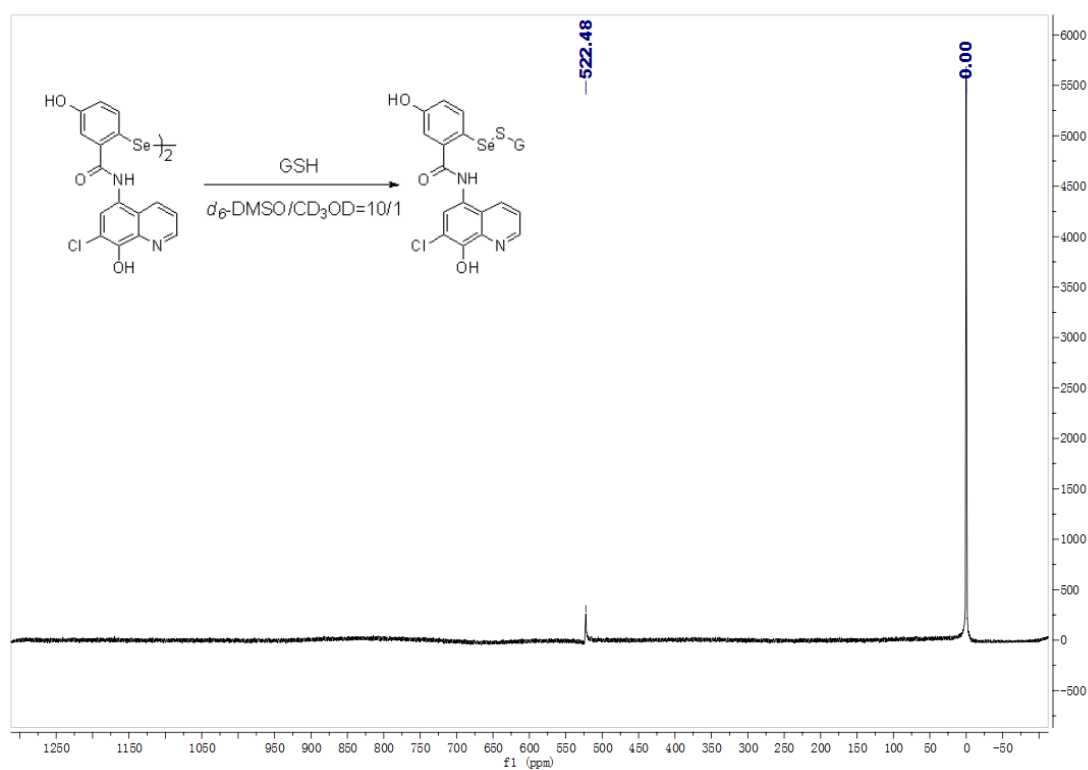

**Figure S46.**  $^{77}\text{Se}$  NMR spectra of selenenyl sulfides **14** obtained from the reaction of diselenide **16** with GSH (2.0 equiv) in  $\text{DMSO-}d_6/\text{H}_2\text{O} = 10/1$  mixture.

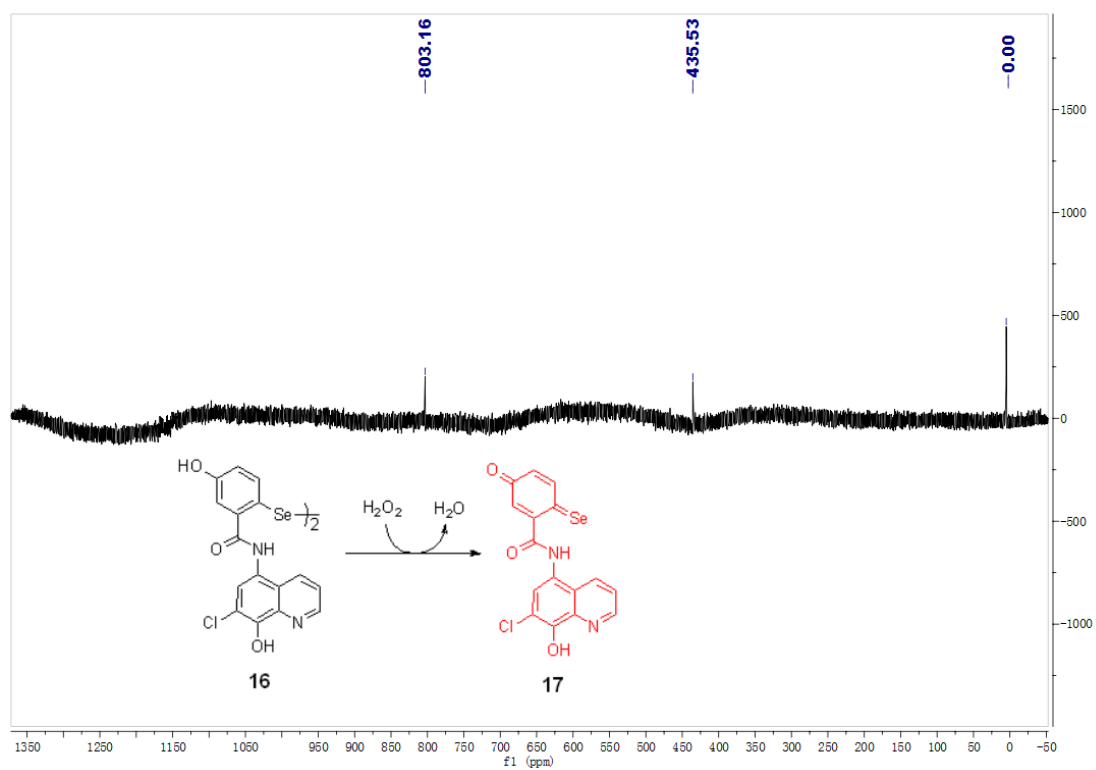

**Figure S47.**  $^{77}\text{Se}$  NMR spectra of diselenide **16** ( $\delta$  435 ppm) and selenium quinone **17** ( $\delta$  803 ppm)

obtained from the the reaction of diselenide **16** with  $\text{H}_2\text{O}_2$  (2.0 equiv) in  $\text{DMSO-}d_6$  within 2 h.

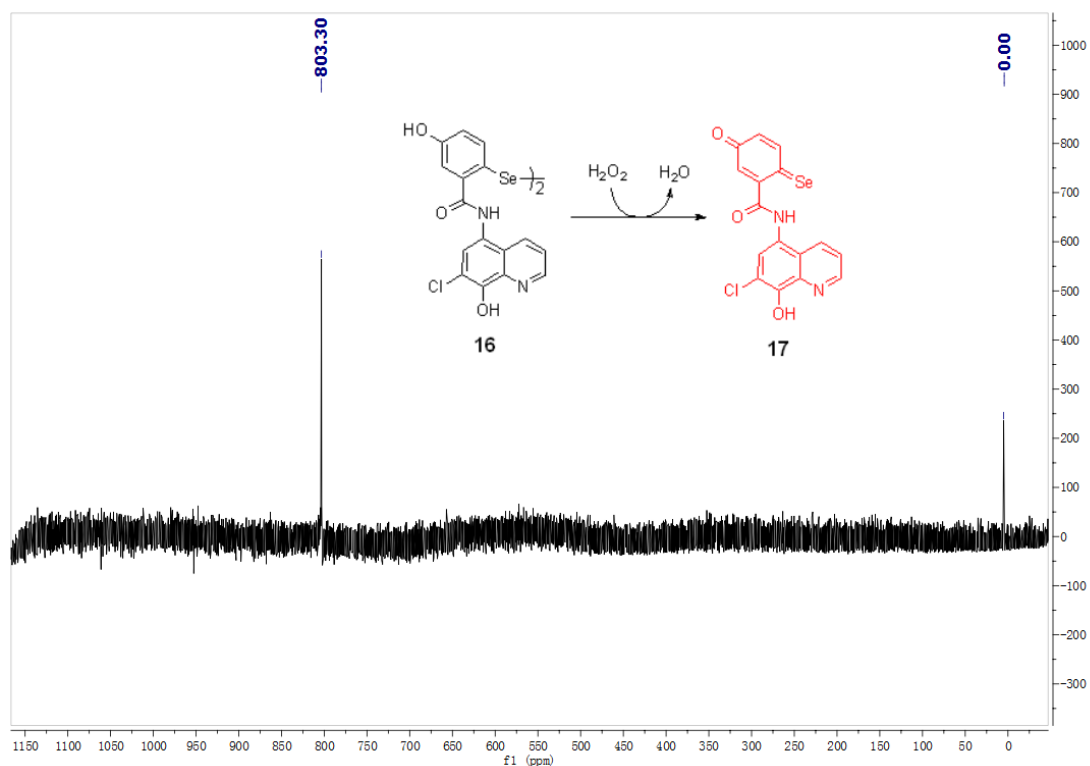

**Figure S48.**  $^{77}\text{Se}$  NMR spectra of selenium quinone **17** ( $\delta$  803 ppm) obtained from the reaction of diselenide **16** with  $\text{H}_2\text{O}_2$  (4.0 equiv) in  $\text{DMSO-}d_6$  after 12 h.

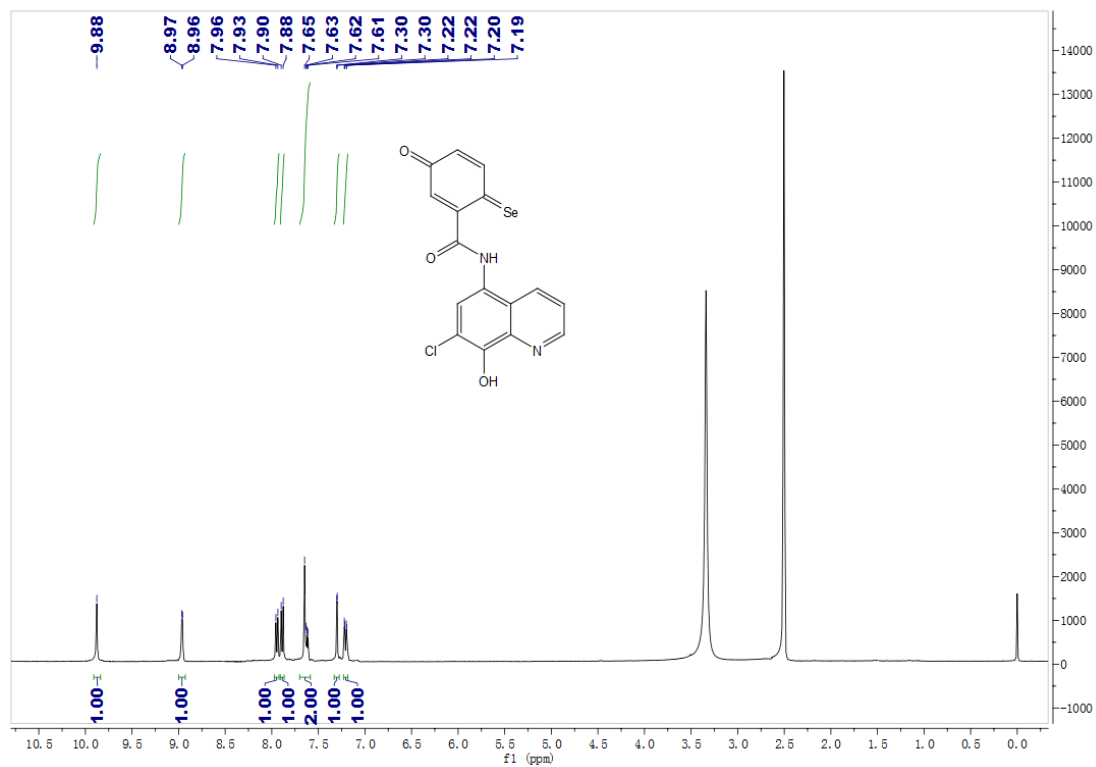

**Figure S49.**  $^1\text{H}$  NMR spectra of selenium quinone **17** (in  $\text{DMSO-}d_6$ ).

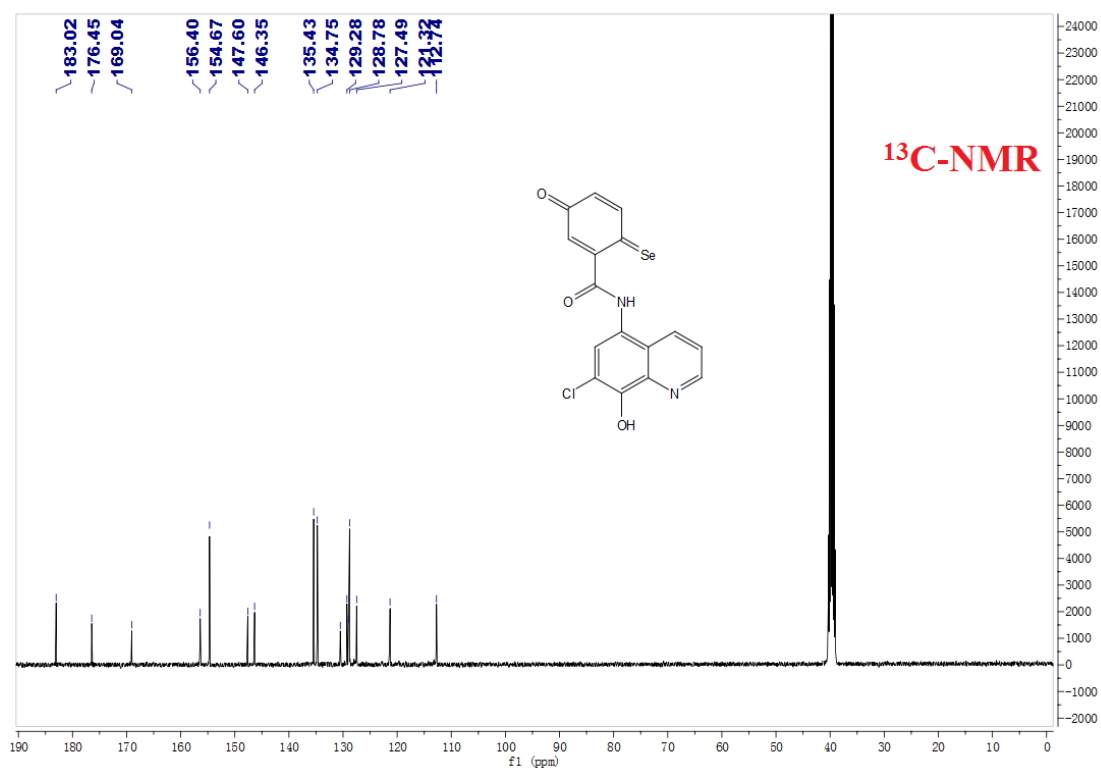

**Figure S50.**  $^{13}\text{C}$  NMR spectra of selenium quinone **17** (in  $\text{DMSO-}d_6$ ). ( $^{13}\text{C}$  NMR  $\delta$  183 ppm and 176 ppm demonstrated the quinone structure)

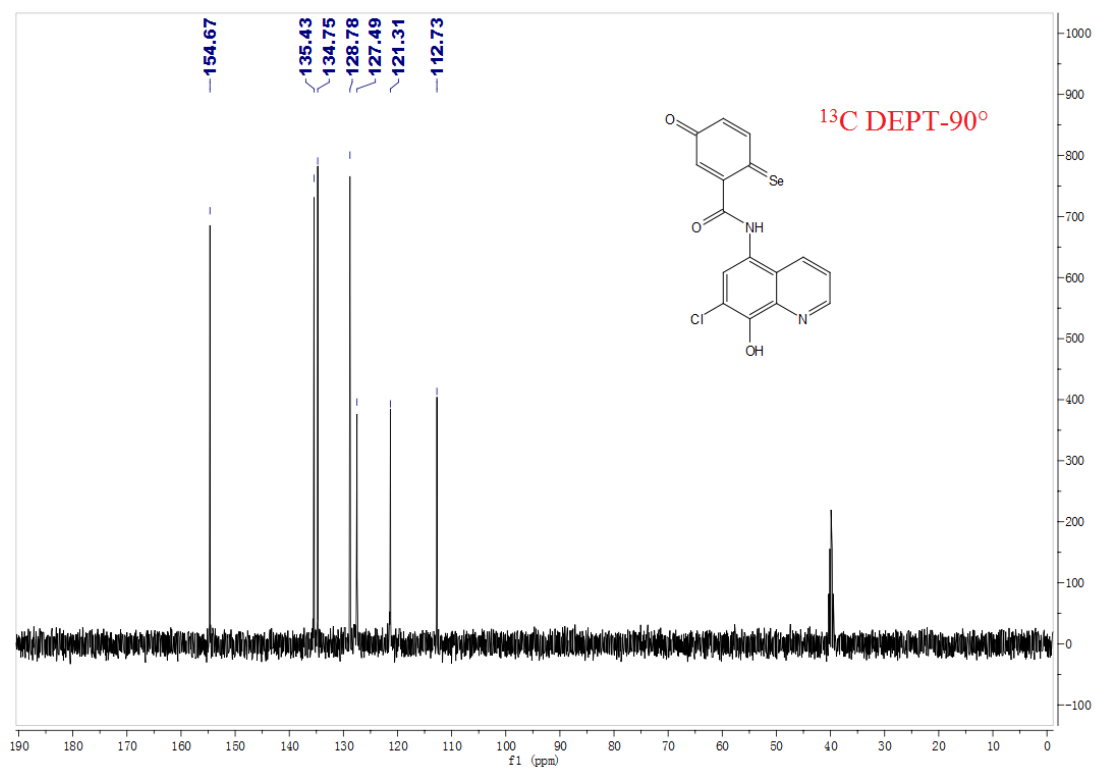

**Figure S51.**  $^{13}\text{C}$  DEPT-90° NMR spectra of selenium quinone **17** (in  $\text{DMSO-}d_6$ ).

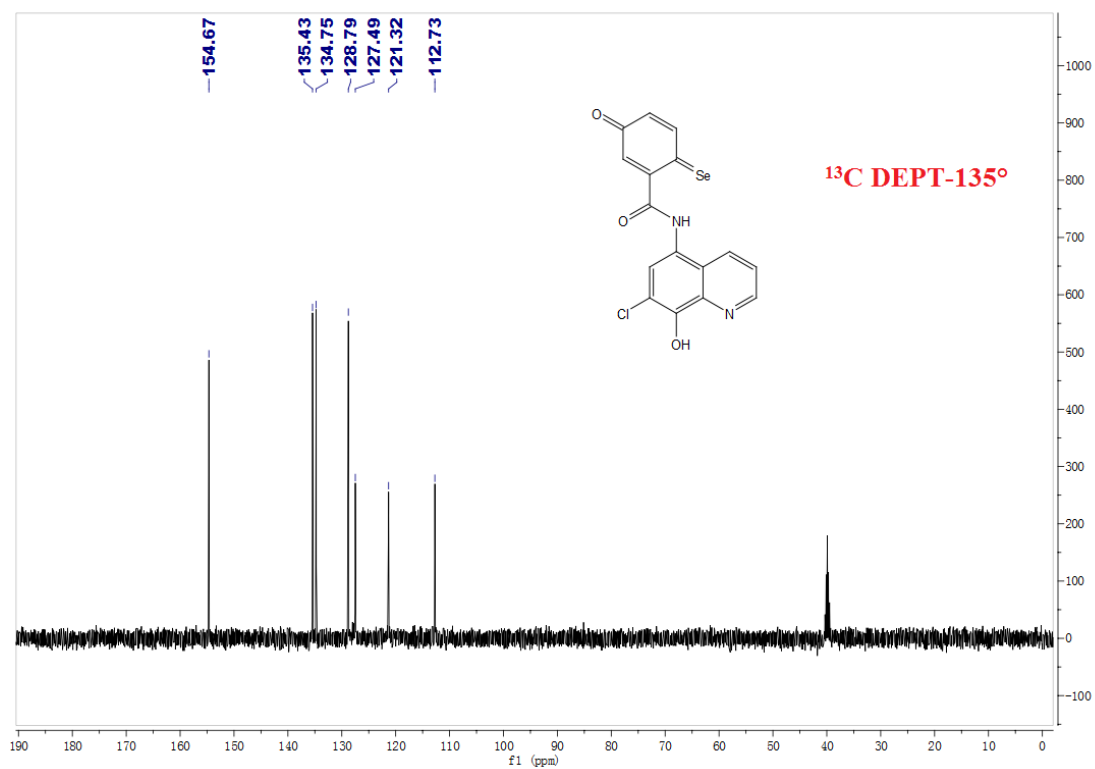

**Figure S52.**  $^{13}\text{C}$  DEPT-135° NMR spectra of selenium quinone **17** (in  $\text{DMSO-}d_6$ ).

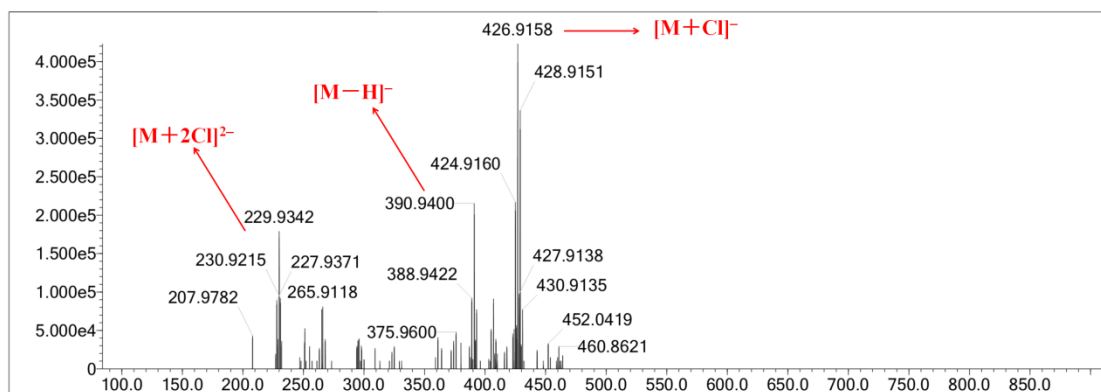

**Figure S53.** HRMS spectra of selenium quinone **17**.  $[M+Cl]^-$  for **17**  $C_{16}H_9N_2O_3ClSe$  pred.

426.9159, meas. 426.9158.

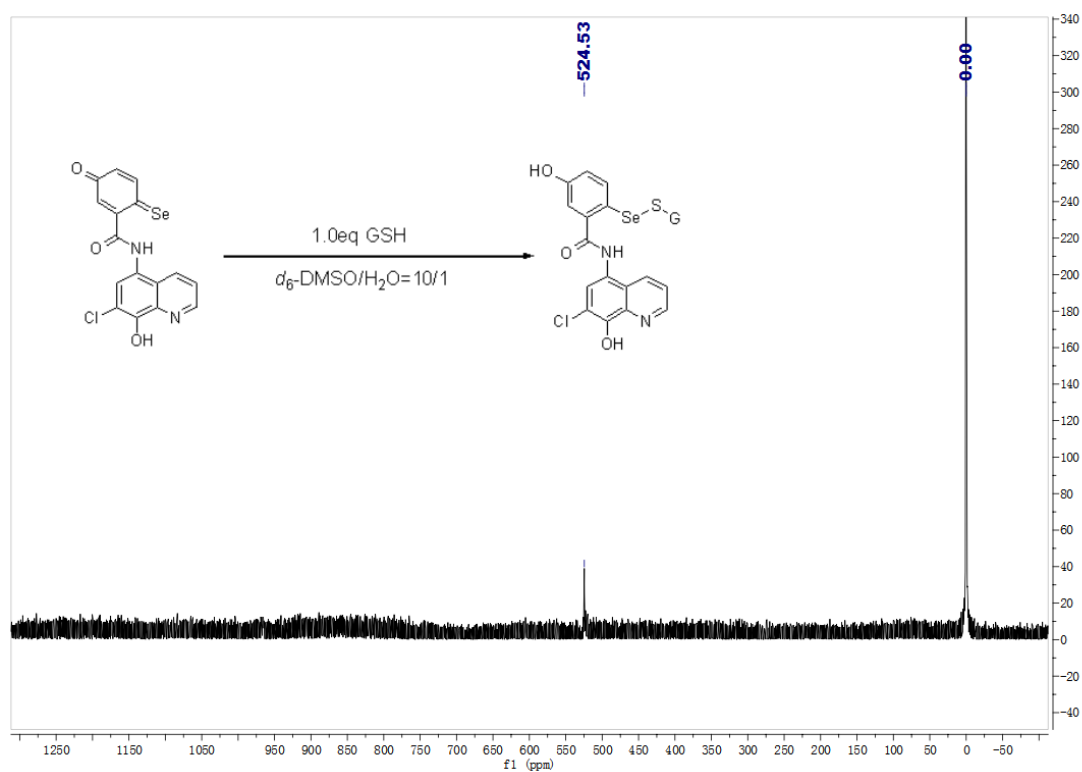

**Figure S54.**  $^{77}Se$  NMR spectra of selenenyl sulfides **14** obtained from the reaction of selenium quinone **17** with GSH (1.0 equiv) in  $DMSO-d_6/H_2O = 10/1$ .

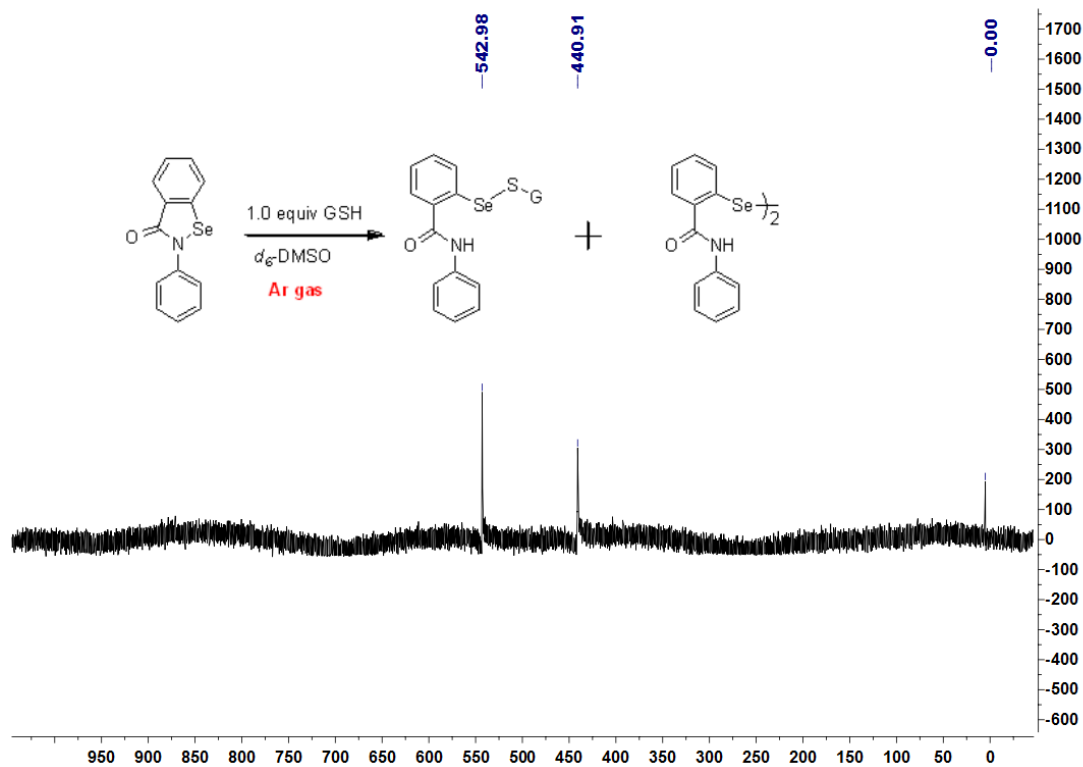

**Figure S55.**  $^{77}\text{Se}$  NMR spectra of selenenyl sulfides and diselenide obtained from the disproportionation reaction of **ebselen** with GSH (1.0 equiv) under Ar condition in  $d_6$ -DMSO.

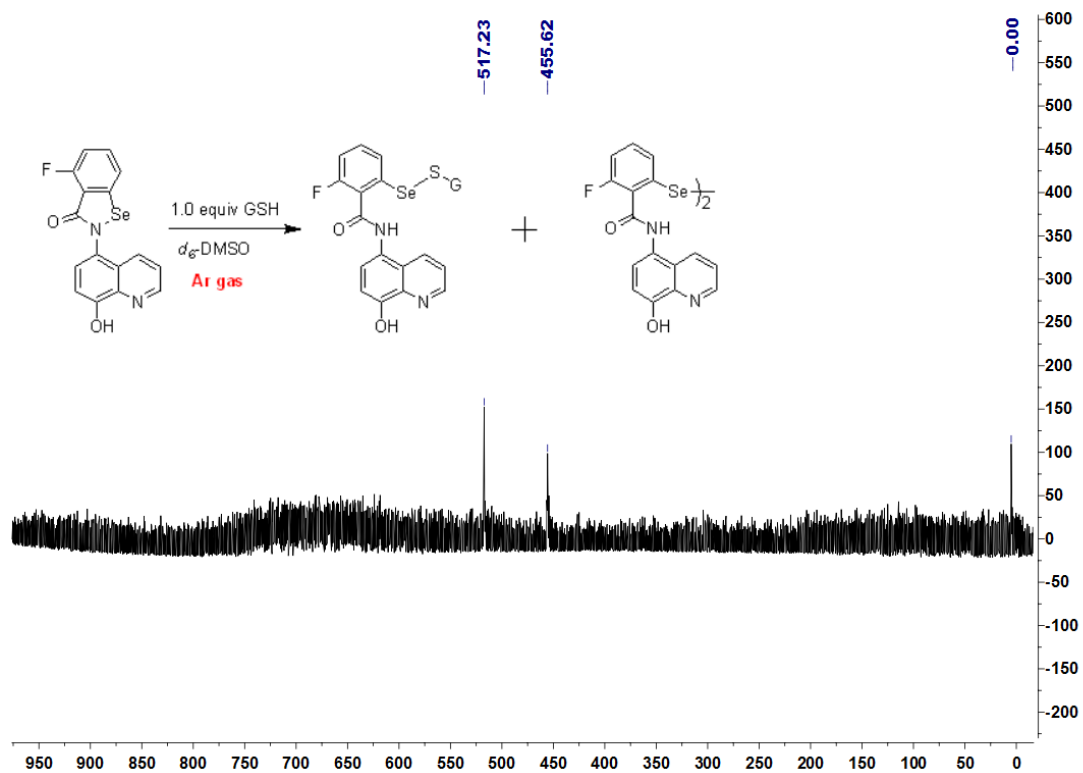



**Figure S56.**  $^{77}\text{Se}$  NMR spectra of selenenyl sulfides and diselenide obtained from the disproportionation reaction of **11f** with GSH (1.0 equiv) under Ar condition in  $d_6$ -DMSO.

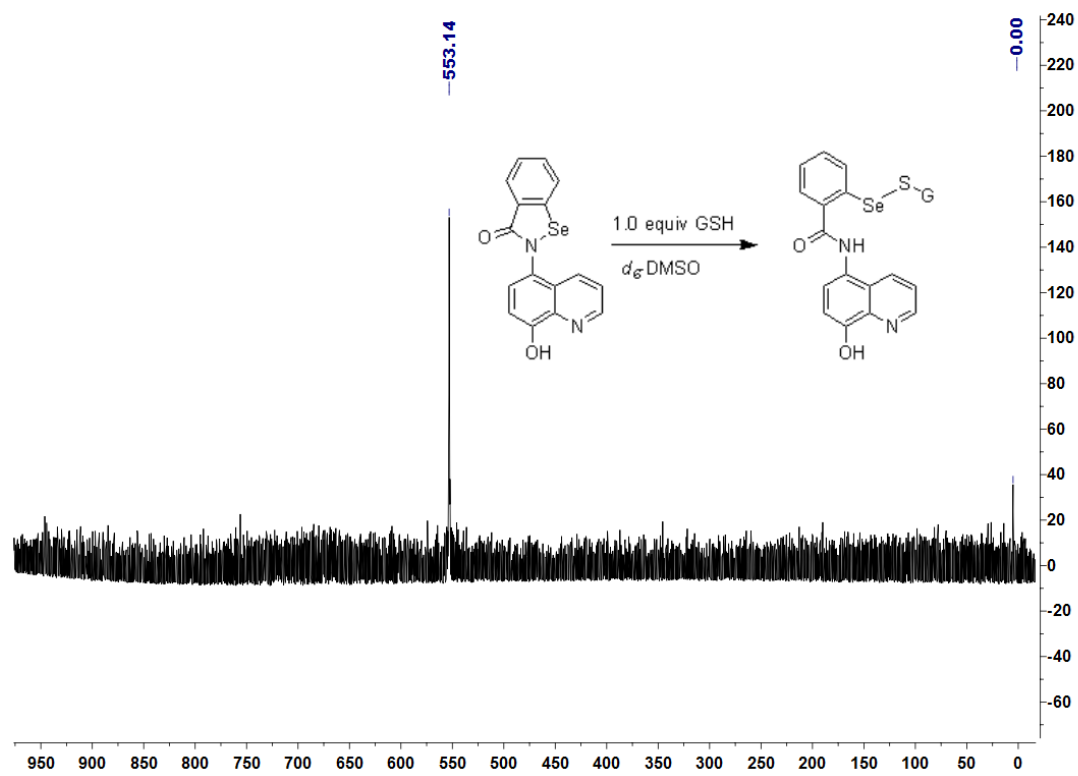

**Figure S57.**  $^{77}\text{Se}$  NMR spectra of selenenyl sulfides obtained from the reaction of **11a** with GSH (1.0 equiv) in  $d_6$ -DMSO.

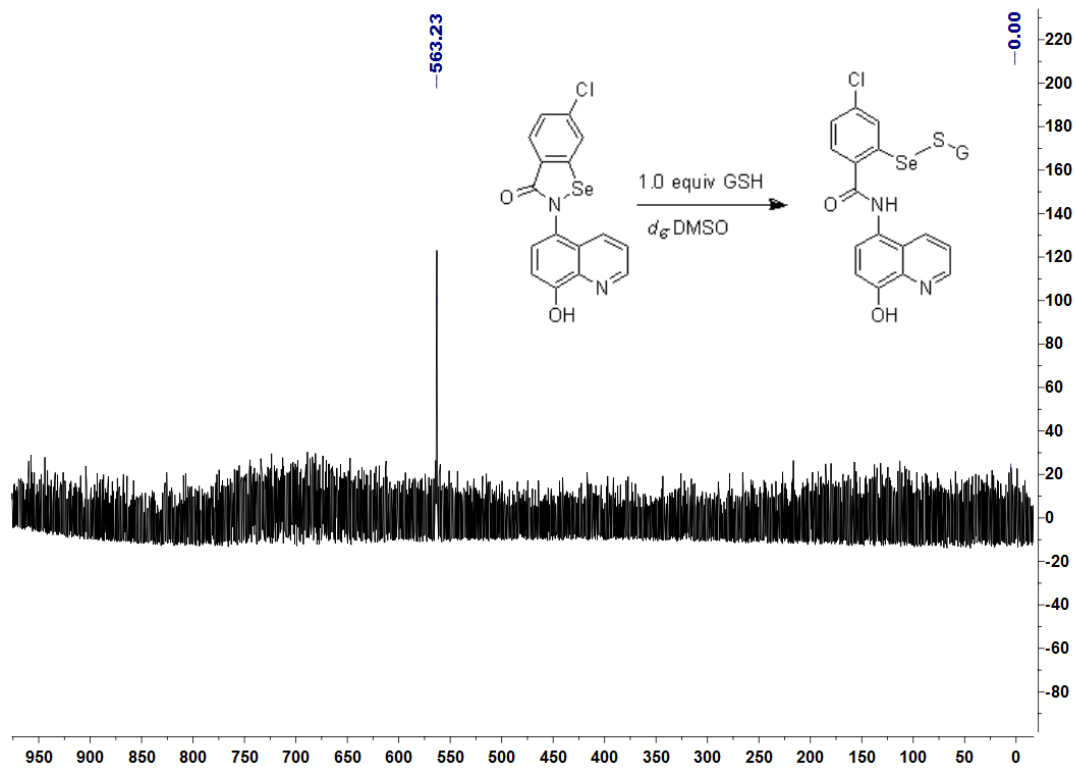

**Figure S58.**  $^{77}\text{Se}$  NMR spectra of selenenyl sulfides obtained from the reaction of **11b** with GSH (1.0 equiv) in  $d_6$ -DMSO.

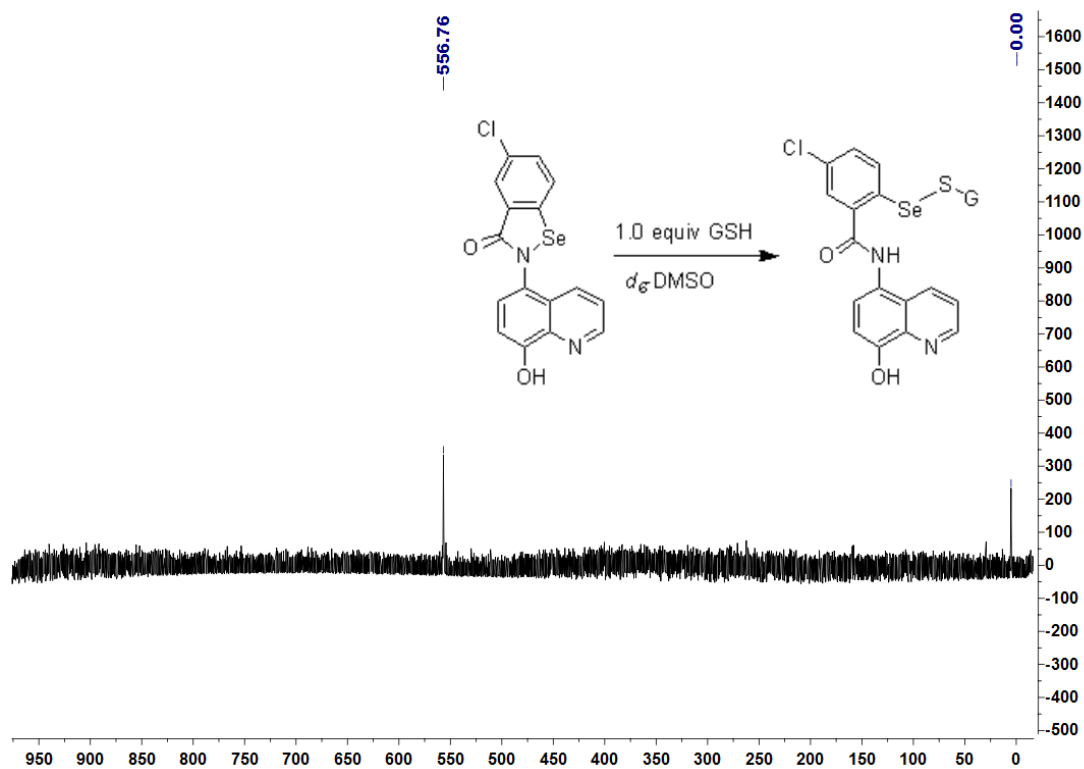

**Figure S59.**  $^{77}\text{Se}$  NMR spectra of selenenyl sulfides obtained from the reaction of **11c** with GSH

(1.0 equiv) in  $d_6$ -DMSO.

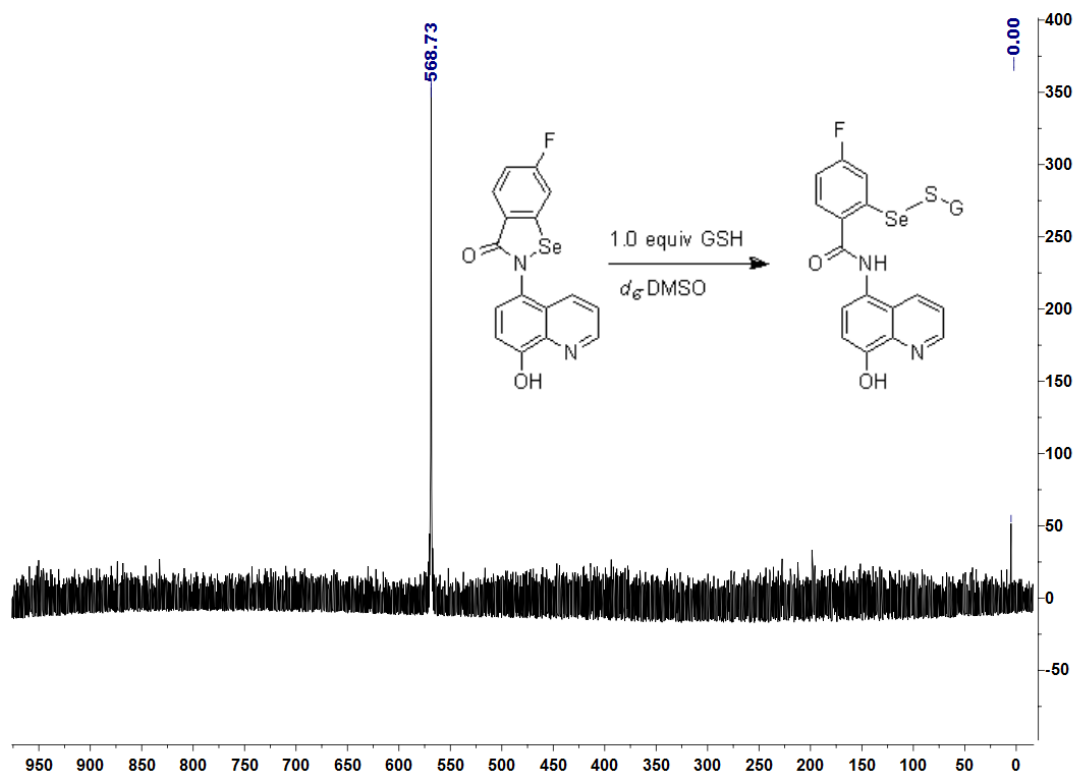

**Figure S60.**  $^{77}\text{Se}$  NMR spectra of selenenyl sulfides obtained from the reaction of **11d** with GSH

(1.0 equiv) in  $d_6$ -DMSO.

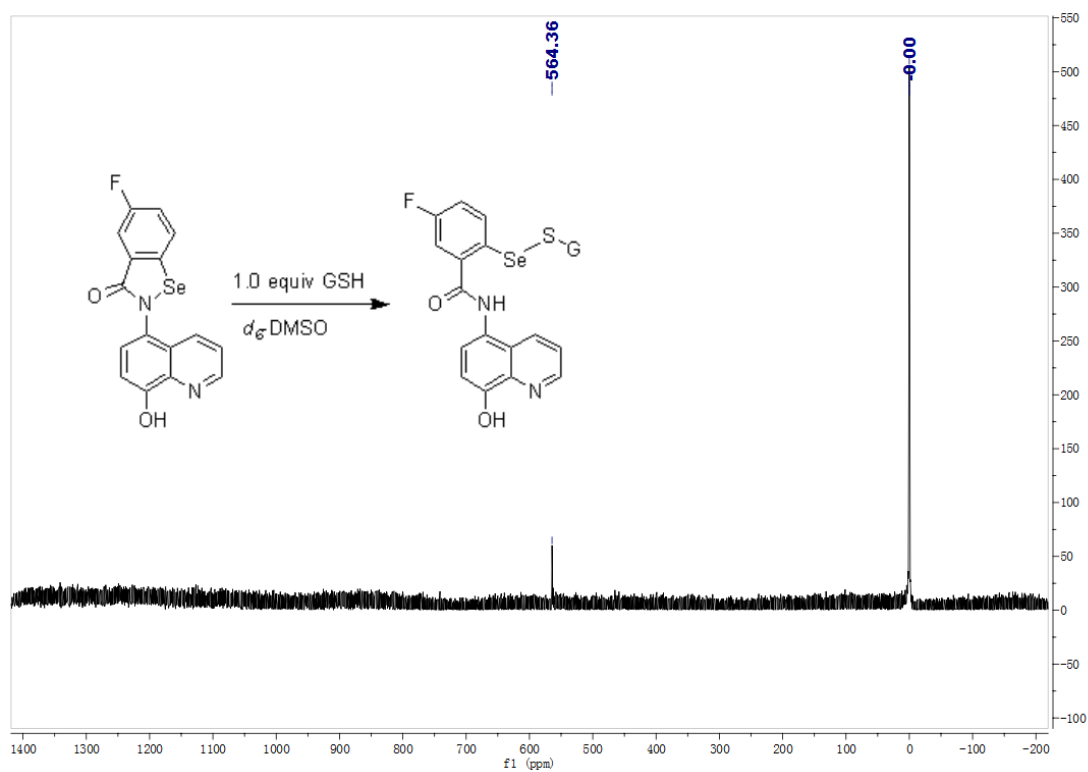

**Figure S61.**  $^{77}\text{Se}$  NMR spectra of selenenyl sulfides obtained from the reaction of **11e** with GSH (1.0 equiv) in  $d_6$ -DMSO.

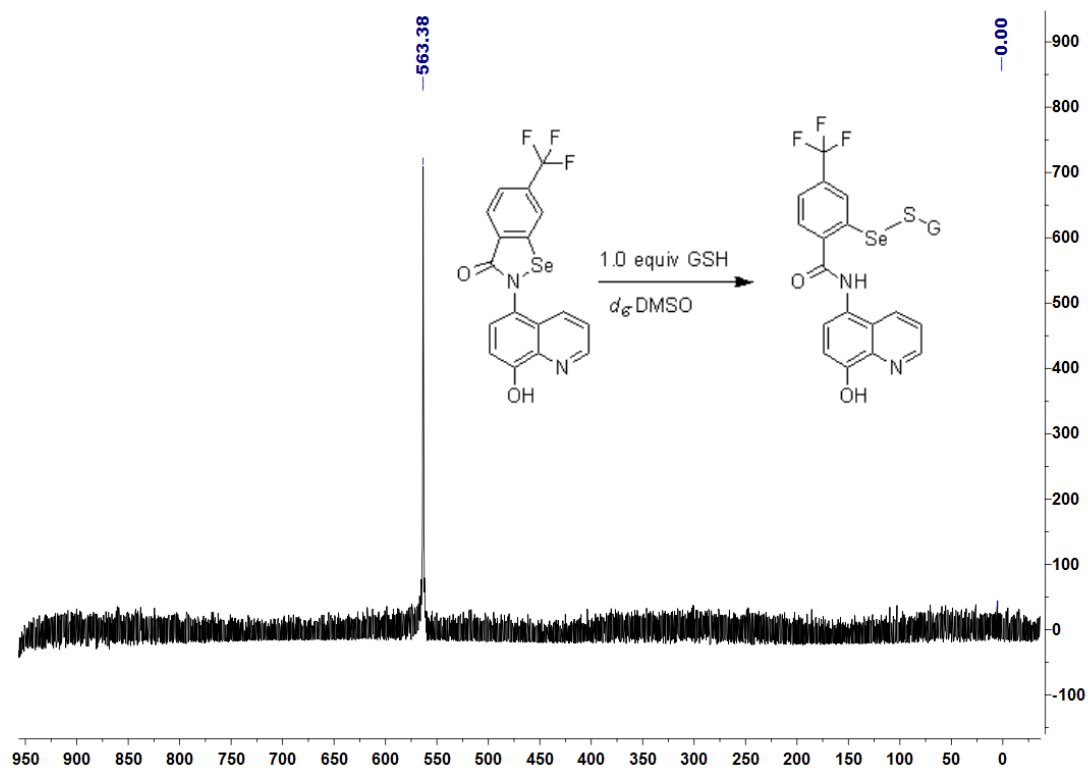

**Figure S62.**  $^{77}\text{Se}$  NMR spectra of selenenyl sulfides obtained from the reaction of **11g** with GSH

(1.0 equiv) in  $d_6$ -DMSO.

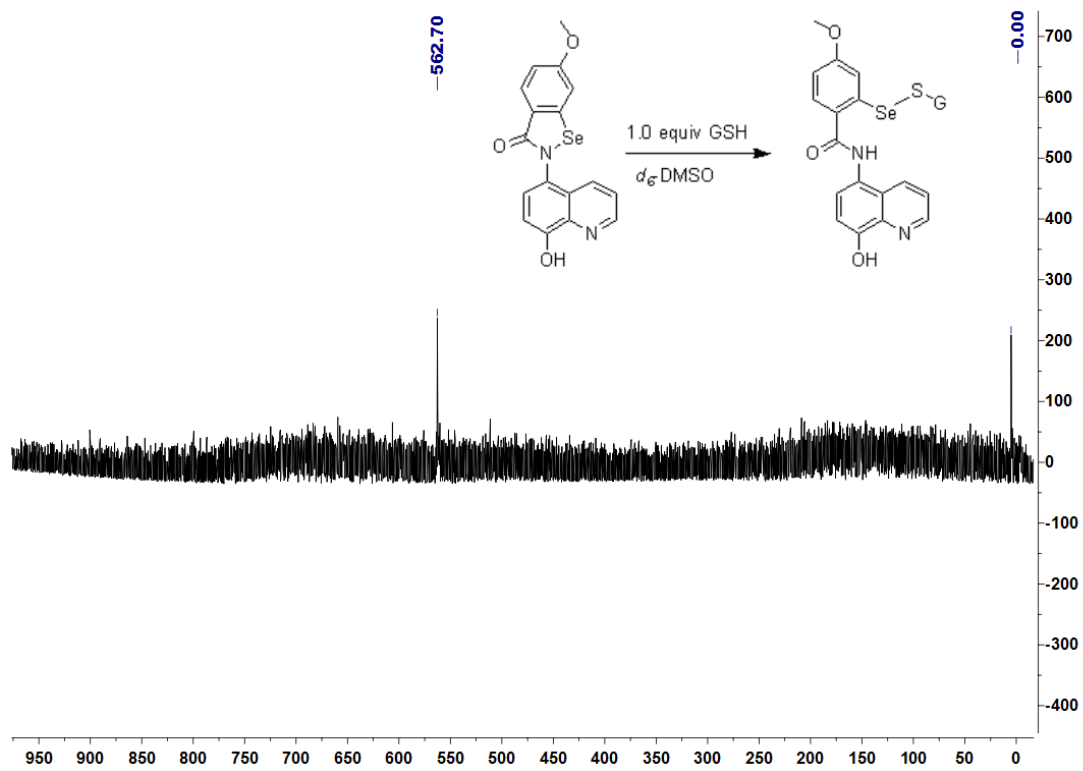

**Figure S63.**  $^{77}\text{Se}$  NMR spectra of selenenyl sulfides obtained from the reaction of **11h** with GSH

(1.0 equiv) in  $d_6$ -DMSO.

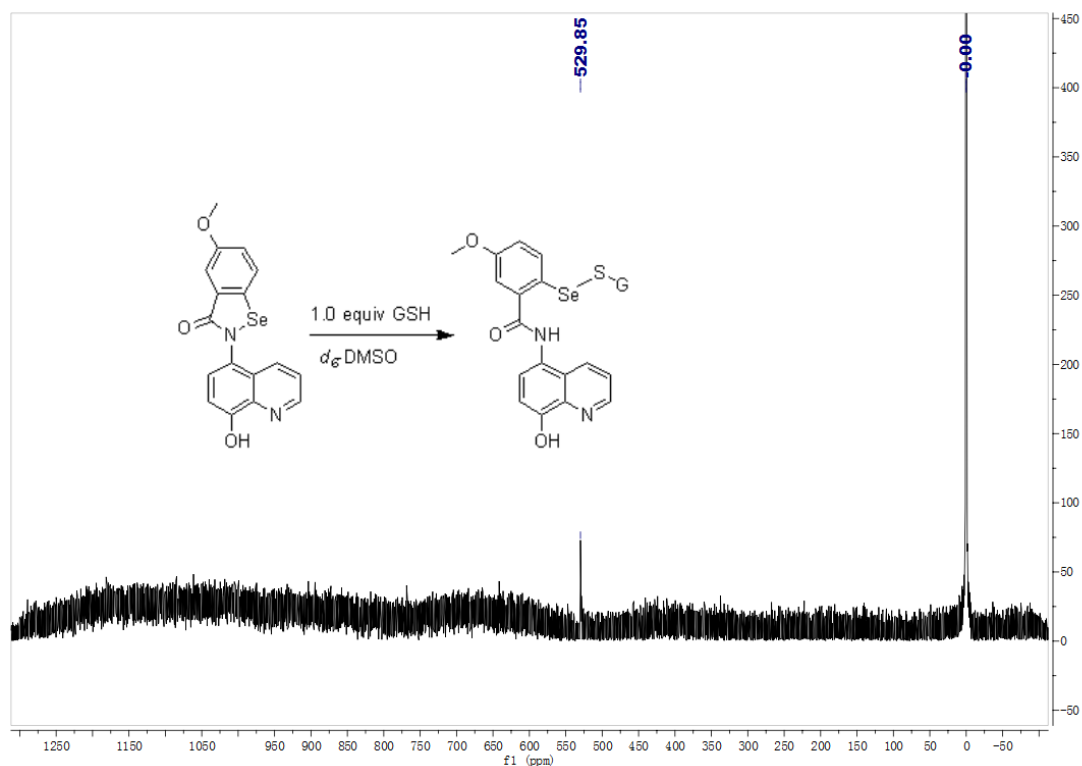

**Figure S64.**  $^{77}\text{Se}$  NMR spectra of selenenyl sulfides obtained from the reaction of **11i** with GSH (1.0 equiv) in  $d_6$ -DMSO.

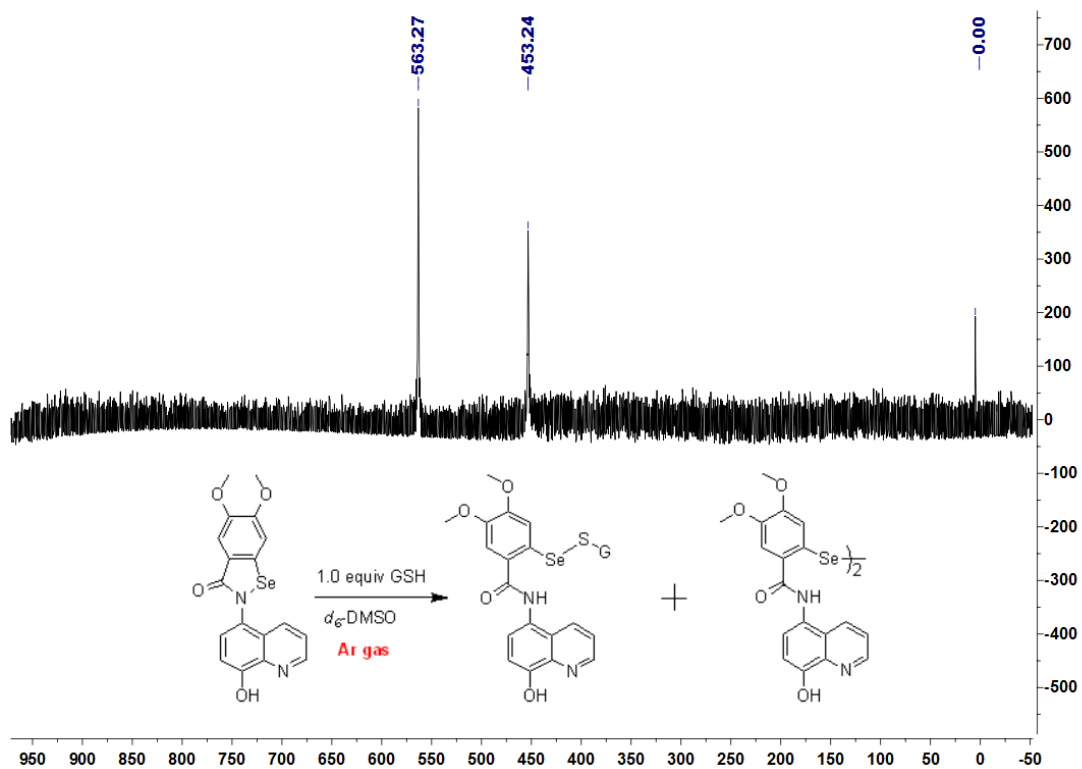

**Figure S65.**  $^{77}\text{Se}$  NMR spectra of selenenyl sulfides and diselenide obtained from the disproportionation reaction of **11j** with GSH (1.0 equiv) under Ar condition in  $d_6$ -DMSO.

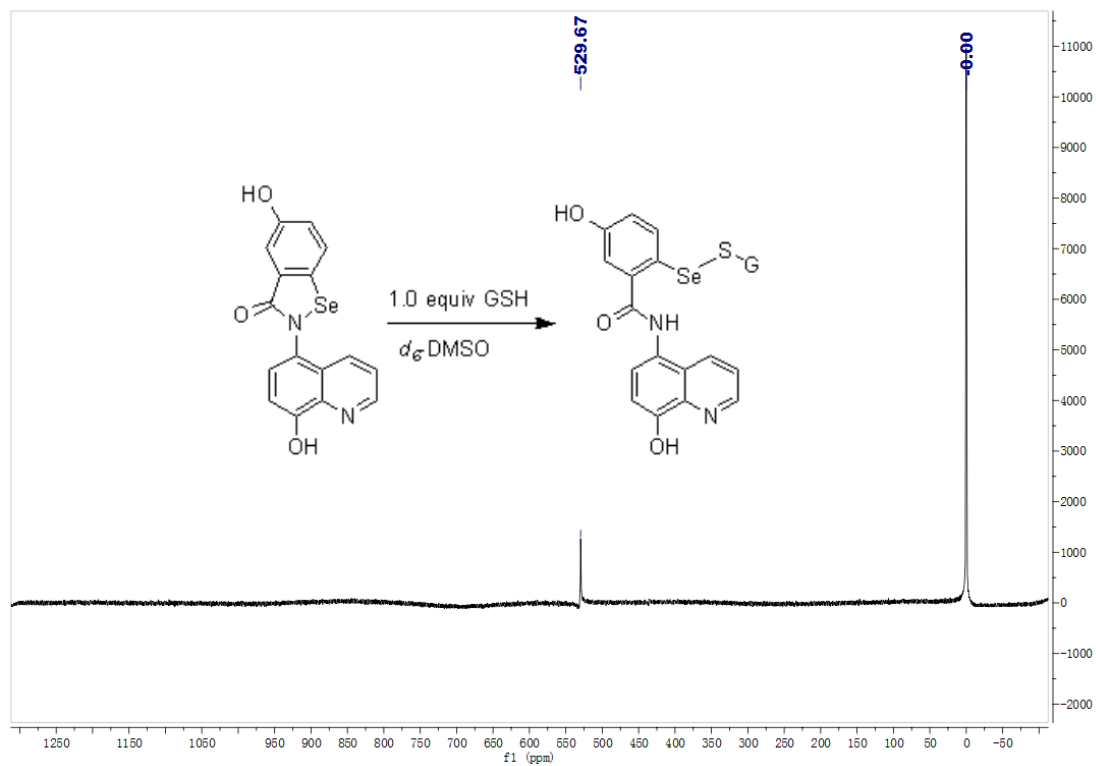

**Figure S66.**  $^{77}\text{Se}$  NMR spectra of selenenyl sulfides obtained from the reaction of **11k** with GSH (1.0 equiv) in  $d_6$ -DMSO.

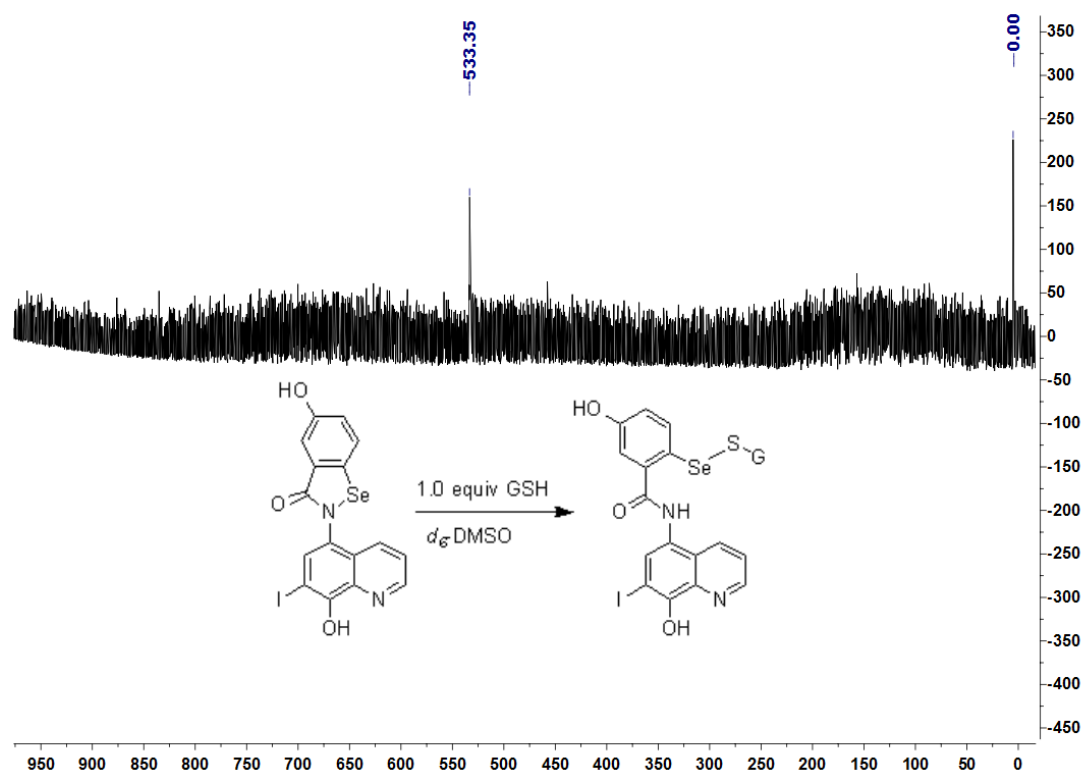

**Figure S67.**  $^{77}\text{Se}$  NMR spectra of selenenyl sulfides obtained from the reaction of **13k** with GSH (1.0 equiv) in  $d_6$ -DMSO.



## 7. UV spectrum of Metal binding

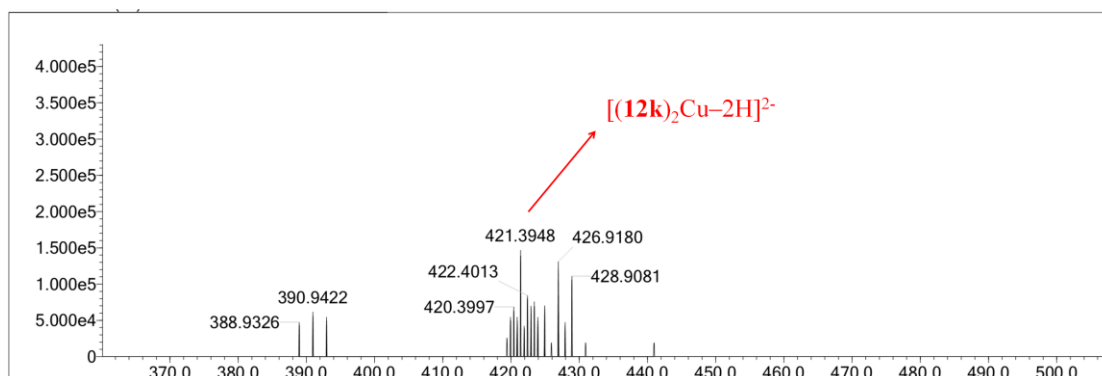

**Figure S68.** High-resolution mass spectra (HRMS) of the **12k**-Cu complex.

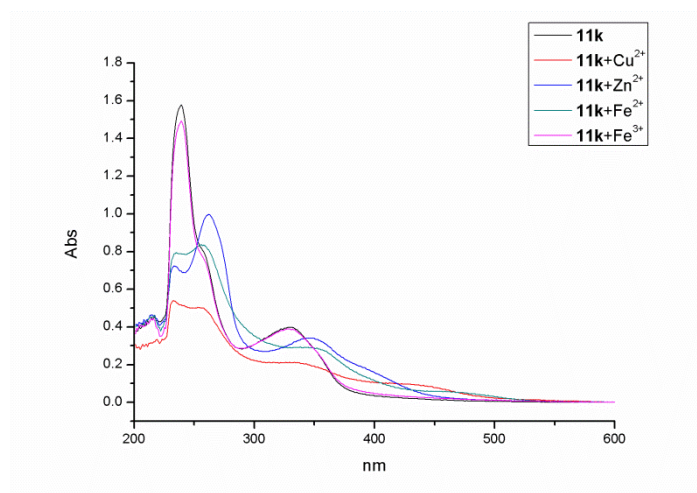

**Figure S69.** UV spectrum of compound **11k** (50  $\mu$ M) alone or in the presence of  $CuSO_4$  (50  $\mu$ M),  $ZnCl_2$  (50  $\mu$ M) or  $FeSO_4$  (50  $\mu$ M) in buffer (20 mM HEPES, 150 mM NaCl, pH 7.4).

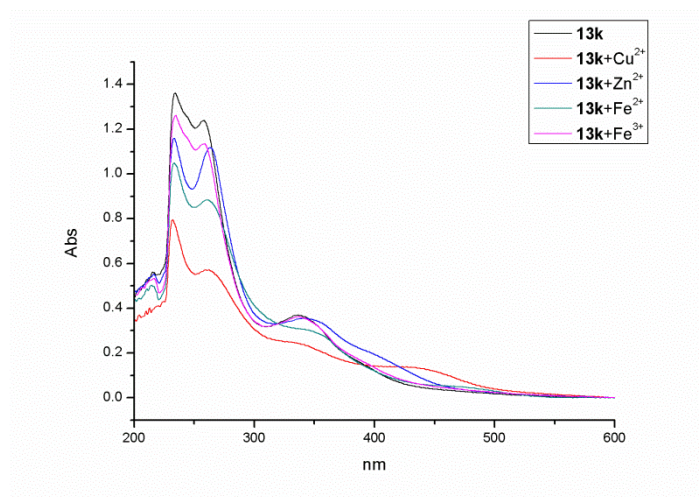

**Figure S70.** UV spectrum of compound **13k** (50 μM) alone or in the presence of CuSO<sub>4</sub> (50 μM), ZnCl<sub>2</sub> (50 μM) or FeSO<sub>4</sub>(50 μM) in buffer (20 mM HEPES, 150 mM NaCl, pH 7.4).

## 8. Tables of results for the PAMPA

**Table S19.** Permeability ( $P_e \times 10^{-6} \text{ cm s}^{-1}$ ) in the PAMPA-BBB assay for 13 commercial drugs, used in the Experiment Validation.

| Commercial drugs | Bibl <sup>a</sup> | PBS : EtOH (70 : 30) <sup>b</sup> |
|------------------|-------------------|-----------------------------------|
| testosterone     | 17                | 22.3 ± 1.4                        |
| verapamil        | 16                | 21.2 ± 1.9                        |
| desipramine      | 12                | 16.4 ± 1.2                        |
| progesterone     | 9.3               | 17.7 ± 1.2                        |
| promazine        | 8.8               | 14.3 ± 0.5                        |
| chlorpromazine   | 6.5               | 6.0 ± 0.3                         |
| clonidine        | 5.3               | 5.1 ± 0.3                         |
| piroxicam        | 2.5               | 0.24 ± 0.01                       |
| hydrocortisone   | 1.9               | 0.65 ± 0.01                       |
| lomefloxacin     | 1.1               | 0.37 ± 0.02                       |
| atenolol         | 0.8               | 0.78 ± 0.02                       |
| ofloxacin        | 0.8               | 0.37 ± 0.02                       |
| theophylline     | 0.1               | 0.26 ± 0.01                       |

<sup>a</sup> Taken from reference.<sup>7</sup> <sup>b</sup> Data are the mean ± SD of three independent experiments

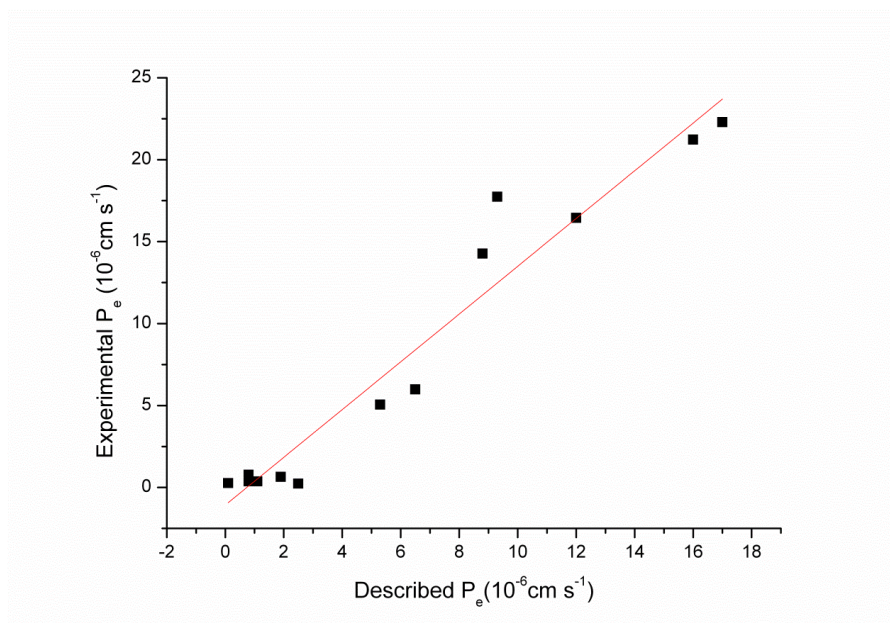

**Figure S71.** Lineal correlation between experimental and reported permeability of commercial drugs using the PAMPA-BBB assay.  $P_e(\text{exp.}) = 1.4574P_e(\text{bibl.}) - 1.0773$  ( $R^2 = 0.9427$ )

**Table S20.** Ranges of Permeability of PAMPA-BBB Assays ( $P_e$ ,  $10^{-6} \text{ cm s}^{-1}$ )

|                                                |                   |
|------------------------------------------------|-------------------|
| Compounds of high BBB permeation (CNS+)        | $P_e > 4.7$       |
| Compounds of uncertain BBB permeation (CNS+/-) | $4.7 > P_e > 1.8$ |
| Compounds of low BBB permeation (CNS-)         | $P_e < 1.8$       |

**Table S21.** Permeability ( $P_e \times 10^{-6} \text{ cm s}^{-1}$ ) determined by the PAMPA-BBB assay for target compounds and predicted penetration of the CNS.

| Compound <sup>a</sup> | $P_e(\times 10^{-6} \text{ cm s}^{-1})^b$ | Prediction | Compound <sup>a</sup> | $P_e(\times 10^{-6} \text{ cm s}^{-1})^b$ | Prediction |
|-----------------------|-------------------------------------------|------------|-----------------------|-------------------------------------------|------------|
| <b>11a</b>            | $6.8 \pm 0.3$                             | CNS+       | <b>11h•HBr</b>        | $8.8 \pm 0.1$                             | CNS+       |
| <b>11b</b>            | $12.7 \pm 0.5$                            | CNS+       | <b>11i</b>            | $7.3 \pm 0.1$                             | CNS+       |

|                |            |      |                |           |      |
|----------------|------------|------|----------------|-----------|------|
| <b>11c</b>     | 12.9 ± 0.2 | CNS+ | <b>11j</b>     | 1.1 ± 0.1 | CNS- |
| <b>11d•HCl</b> | 10.8 ± 0.3 | CNS+ | <b>11k•HCl</b> | 1.2 ± 0.1 | CNS- |
| <b>11e</b>     | 11.9 ± 0.2 | CNS+ | <b>12k•HCl</b> | 5.3 ± 0.1 | CNS+ |
| <b>11f•HCl</b> | 3.2 ± 0.1  | CNS± | <b>13k•HCl</b> | 3.0 ± 0.1 | CNS± |
| <b>11g•HCl</b> | 13.3 ± 0.4 | CNS± | Chlorpromazine | 5.1 ± 0.2 | CNS+ |

---

<sup>a</sup> Compounds were dissolved in DMSO at 5 mg mL<sup>-1</sup> and diluted with PBS / EtOH (70:30).

<sup>b</sup> Values are expressed as the means ± SD of three independent experiments.

## References

1. B. K. Sarma and G. Mugesh, *J. Am. Chem. Soc.*, 2005, **127**, 11477-11485.
2. K. Selvakumar, P. Shah, H. B. Singh and R. J. Butcher, *Chem. Eur. J.*, 2011, **17**, 12741-12755.
3. N. B. Patel, J. C. Patel and S. H. Modi, *J. Saudi. Chem. Soc.*, 2011, **15**, 167-176.
4. U. K. Mazumder, M. Gupta, S. Bhattacharya, S. S. Karki, S. Rathinasamy and S. Thangavel, *J. Enzyme. Inhib. Med. Chem.*, 2004, **19**, 185-192.
5. Z. Wang, Y. Wang, W. Li, F. Mao, Y. Sun, L. Huang and X. Li, *ACS Chem. Neurosci.*, 2014, **5**, 952-962.
6. J. He, D. Li, K. Xiong, Y. Ge, H. Jin, G. Zhang, M. Hong, Y. Tian, J. Yin and H. Zeng, *Bioorg. Med. Chem.*, 2012, **20**, 3816-3827.
7. L. Di, E. H. Kerns, K. Fan, O. J. McConnell and G. T. Carter, *Eur. J. Med. Chem.*, 2003, **38**, 223-232.
